# Supplementary material for: Connectivity in Spanish metapopulation of Dupont’s lark may be maintained by dispersal over medium-distance range and stepping stones
Source: PeerJ journal article supplement (doi:10.7717/peerj.11925), 2021-08-19

**Population n° 1: Arribes del Duero Oeste.** 1 subpopulation: Fariza.

**Population n° 2: Sierra de la Culebra.** 4 subpopulations: Donadillo, Villanueva de Valrojo, Tábara, Vegalatrave.

**Population n° 3: Arribes del Duero Este.** 2 subpopulations: Villaseco del Pan, Almaraz de Duero.

**Subpopulations of recent extinction (post-2000):** Sierra de Cantadores, Páramo de Castañeda.

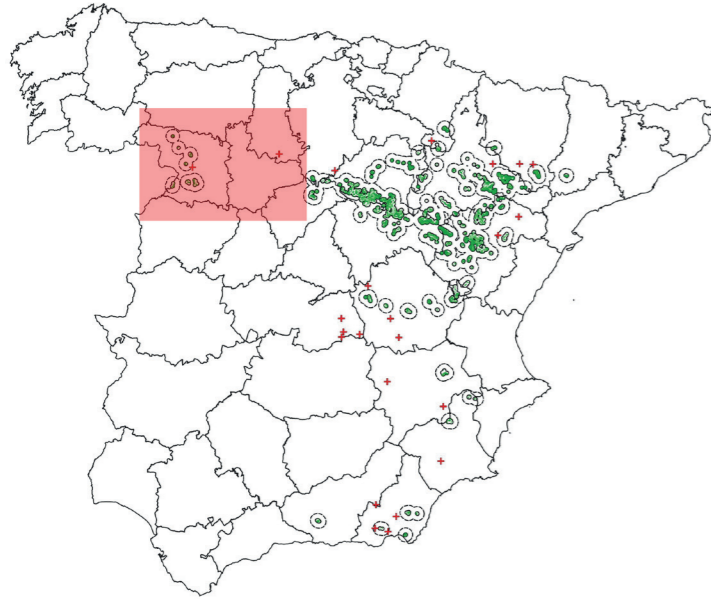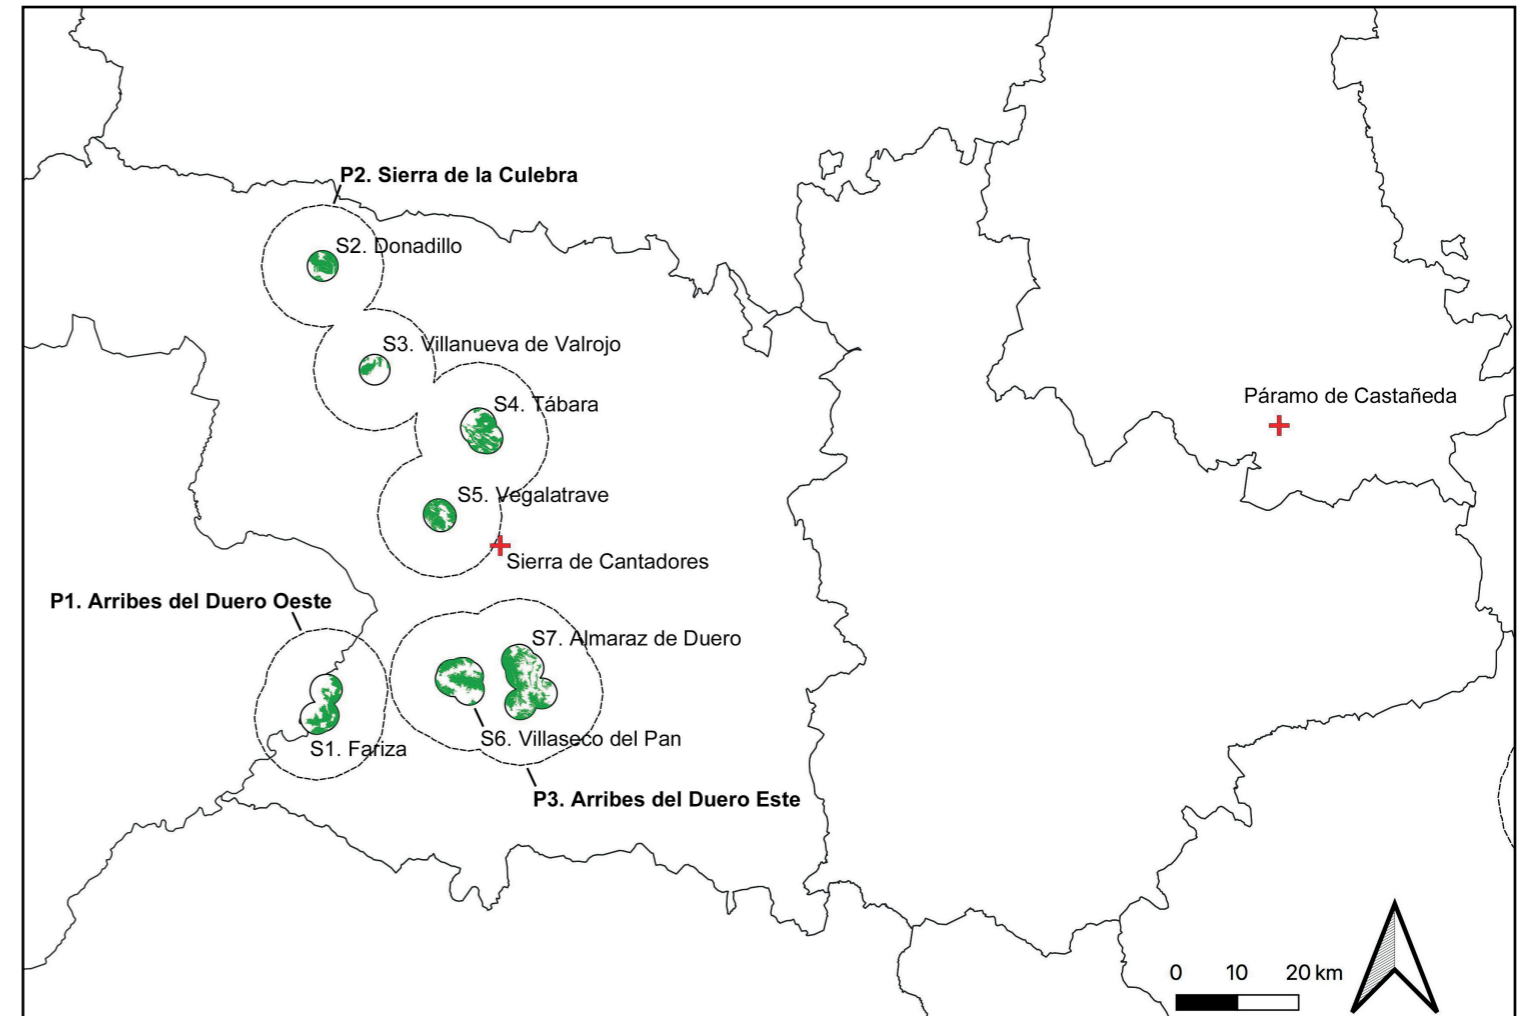

**Population n° 4: Moncayo-Gómara.** 8 subpopulations: Velilla de la Sierra, Arancón, Aldealpozo, Pozalmuro, Pinilla del Campo, Dévanos, Aranda de Moncayo, Deza.

**Population n° 5: Ablitas.** 1 subpopulation: Ablitas.

**Population n° 6: Bardenas.** 1 subpopulation: Bardenas.

**Population n° 7: Campo de borja.** 1 subpopulation: Talamantes.

**Subpopulations of recent extinction (post-2000):** Balsa del Pulguer.

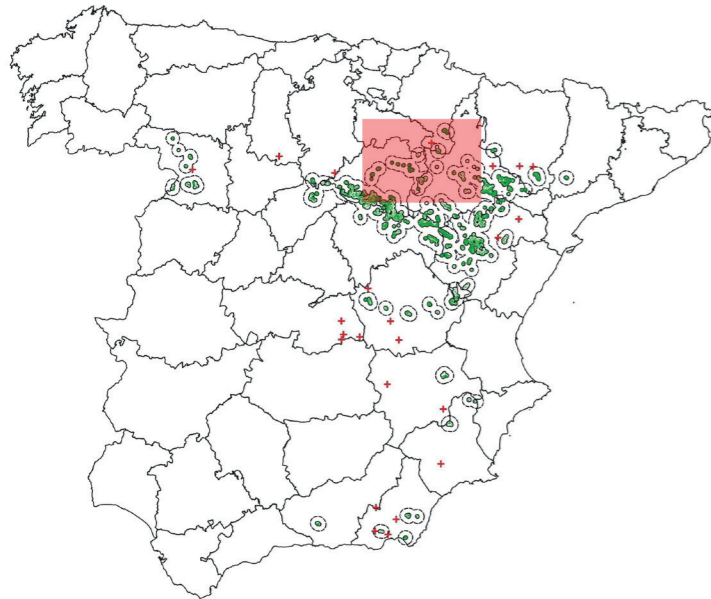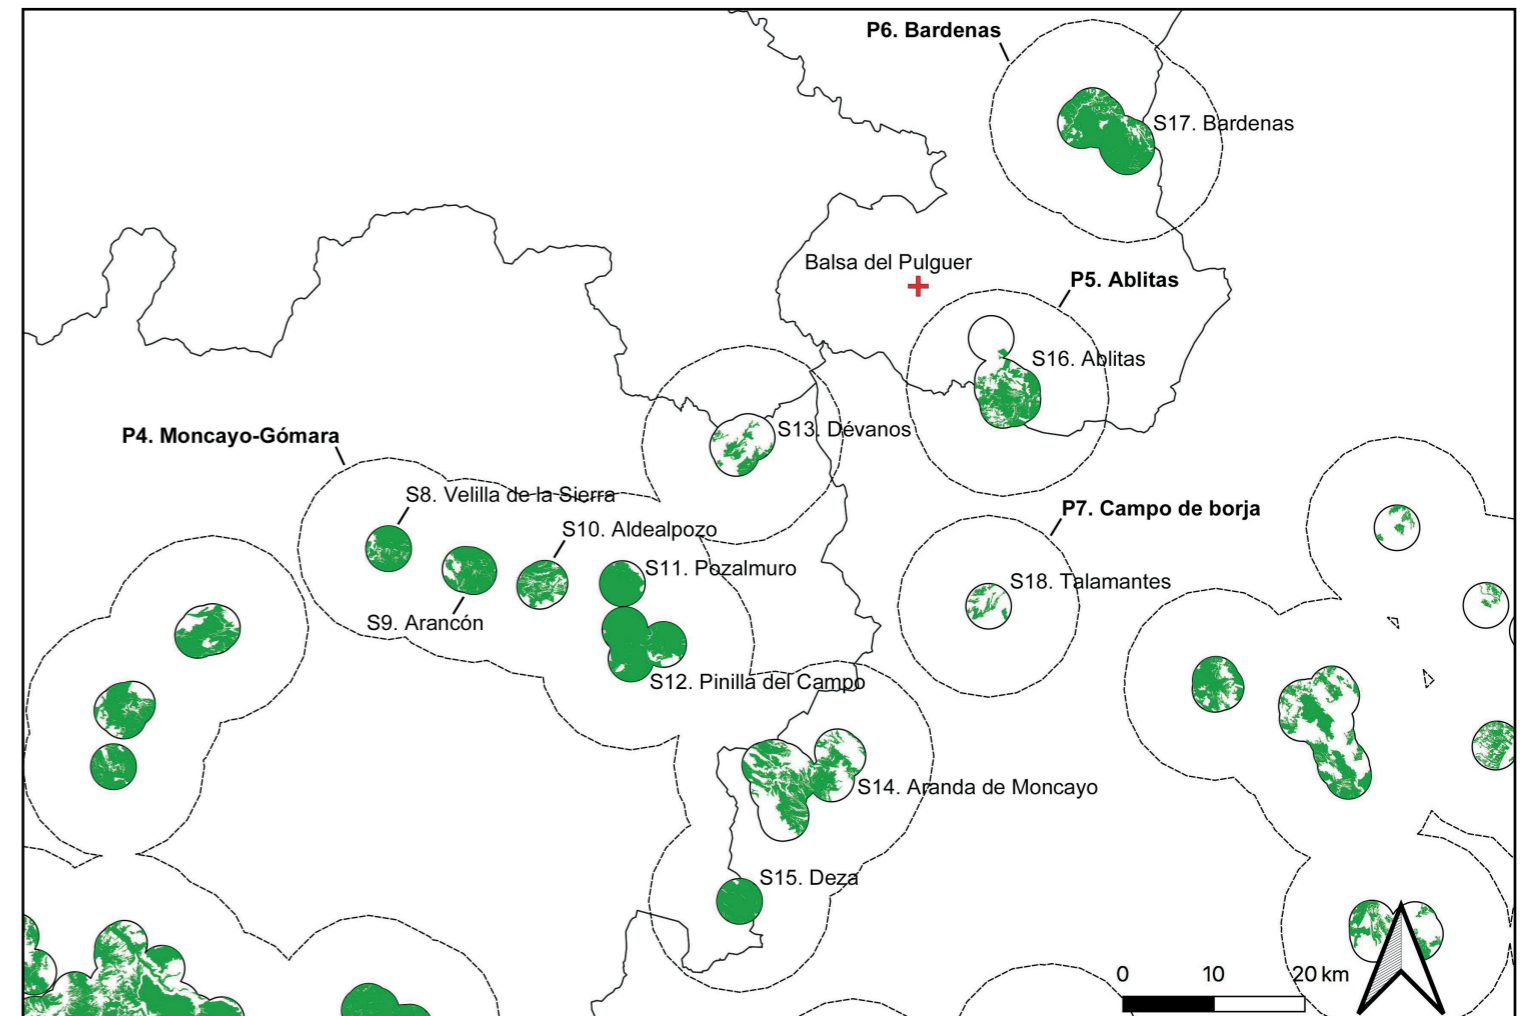

**Population n° 8: Tardienta.** 1 subpopulation: Tardienta.

**Population n° 9: Bajo Cinca.** 1 subpopulation: Ballobar.

**Population n° 10: Alfés.** 1 subpopulation: Alfés.

**Subpopulations of recent extinction (post-2000):** Perdiguera, Albalatillo, Alcolea de Cinca.

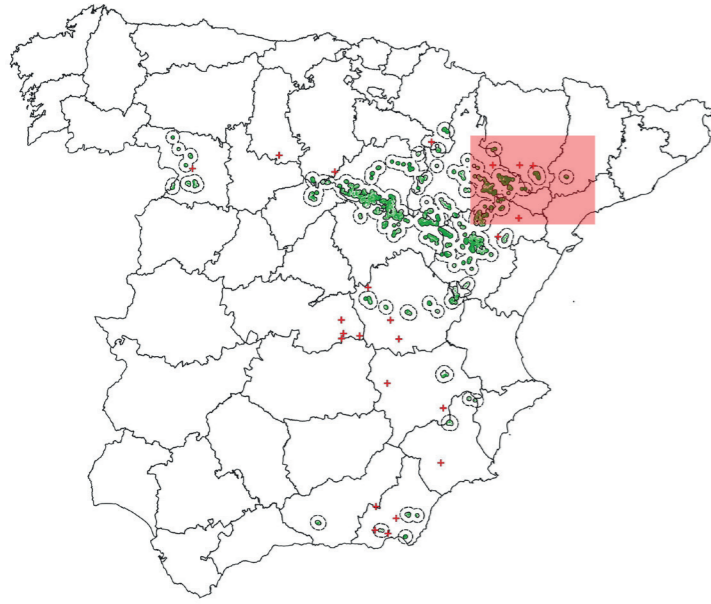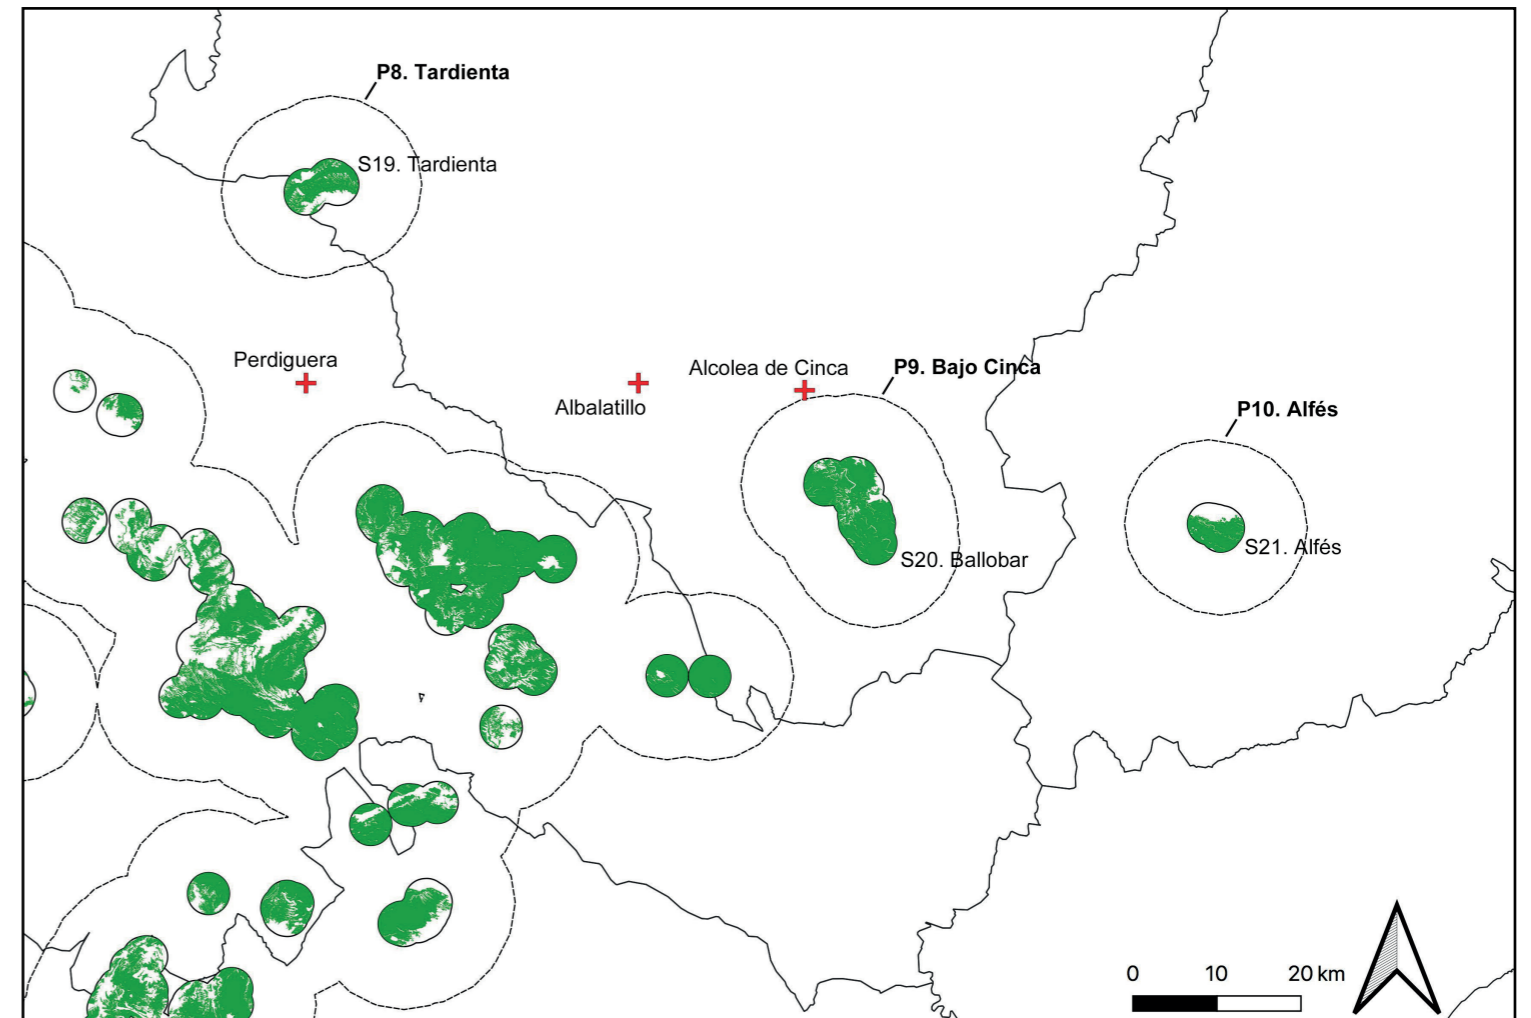

**Population n° 11: S. Ibérico - V. del Ebro.** 61 subpopulations: Páramo de Corcos, Hoces del Riaza, Los Castros, Hoces del Duratón, Cenegro, Atauta, Las Fraguas, Nafria la Llana, Fuentelárbol, Brias, Altos de Barahona, Hiendelaencina, Conquezuela, Sigüenza, Layna, La Torresaviñán, Hortezueta de Océn, Riba de Saelices, Cueva de la Hoz, Marañchón, [continues in the next map].

**Subpopulations of recent extinction (post-2000):** Casanova.

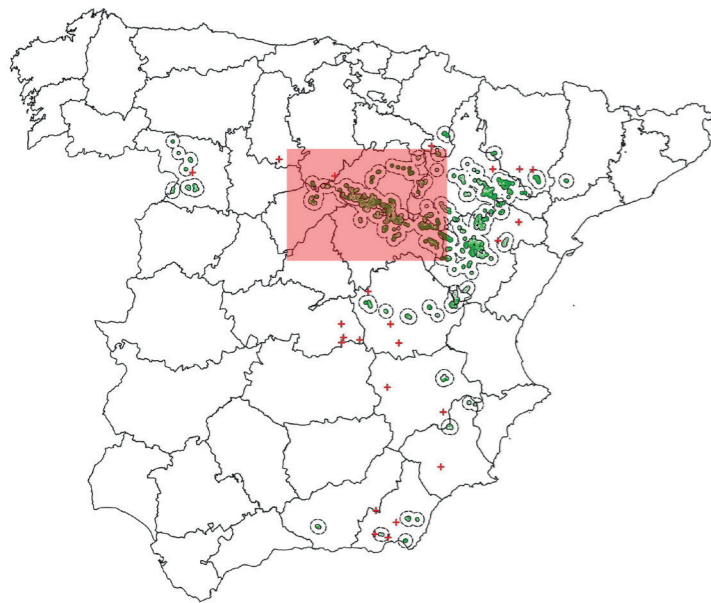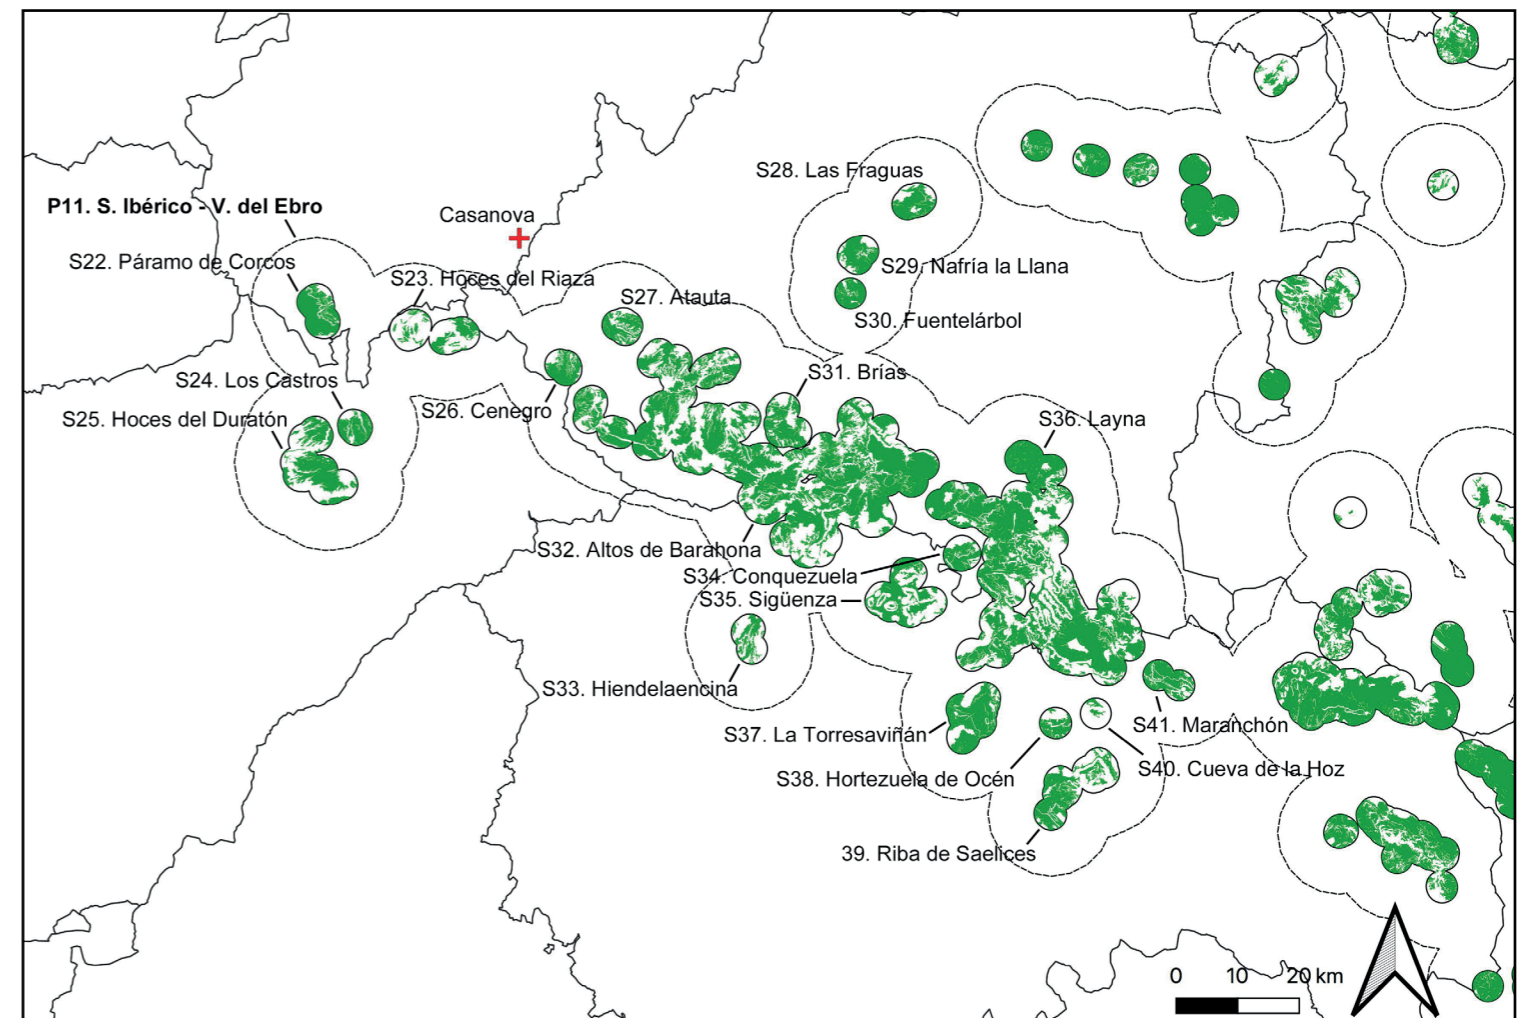

**Population n° 11: S. Ibérico - V. del Ebro.** 61 subpopulations: Alhama de Aragón, Milmarcos-Llumes, Paramera de Molina, Torralba de los Frailes, Calatayud, Campo Romanos, Segura de los Baños, Lechago, Cutanda, Castilnovo, Río Gallo, Blancas, Puerto Bañón, Aitiplano de Teruel, Villar del Salz, Aguatón, Orihuela del Tremedal, Pozondón, Gea de Albarracín, Celadas Oeste, Celadas Este Valdecebro, Allepuz, [continues in the next map].

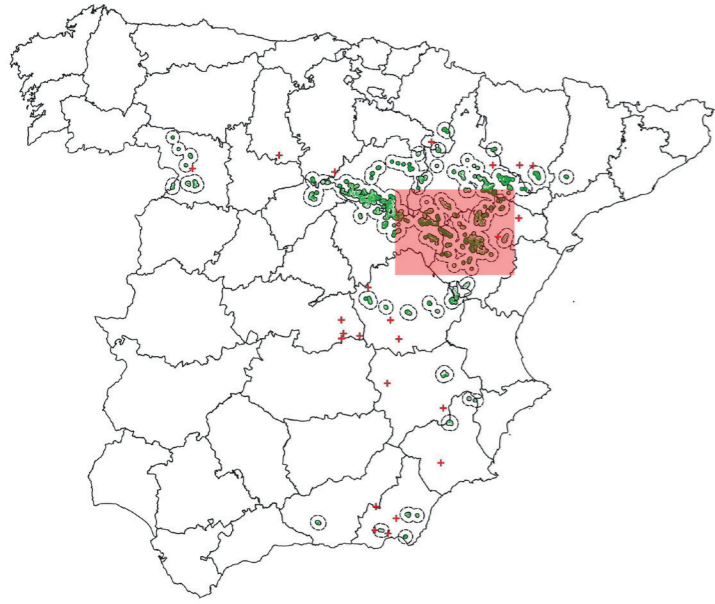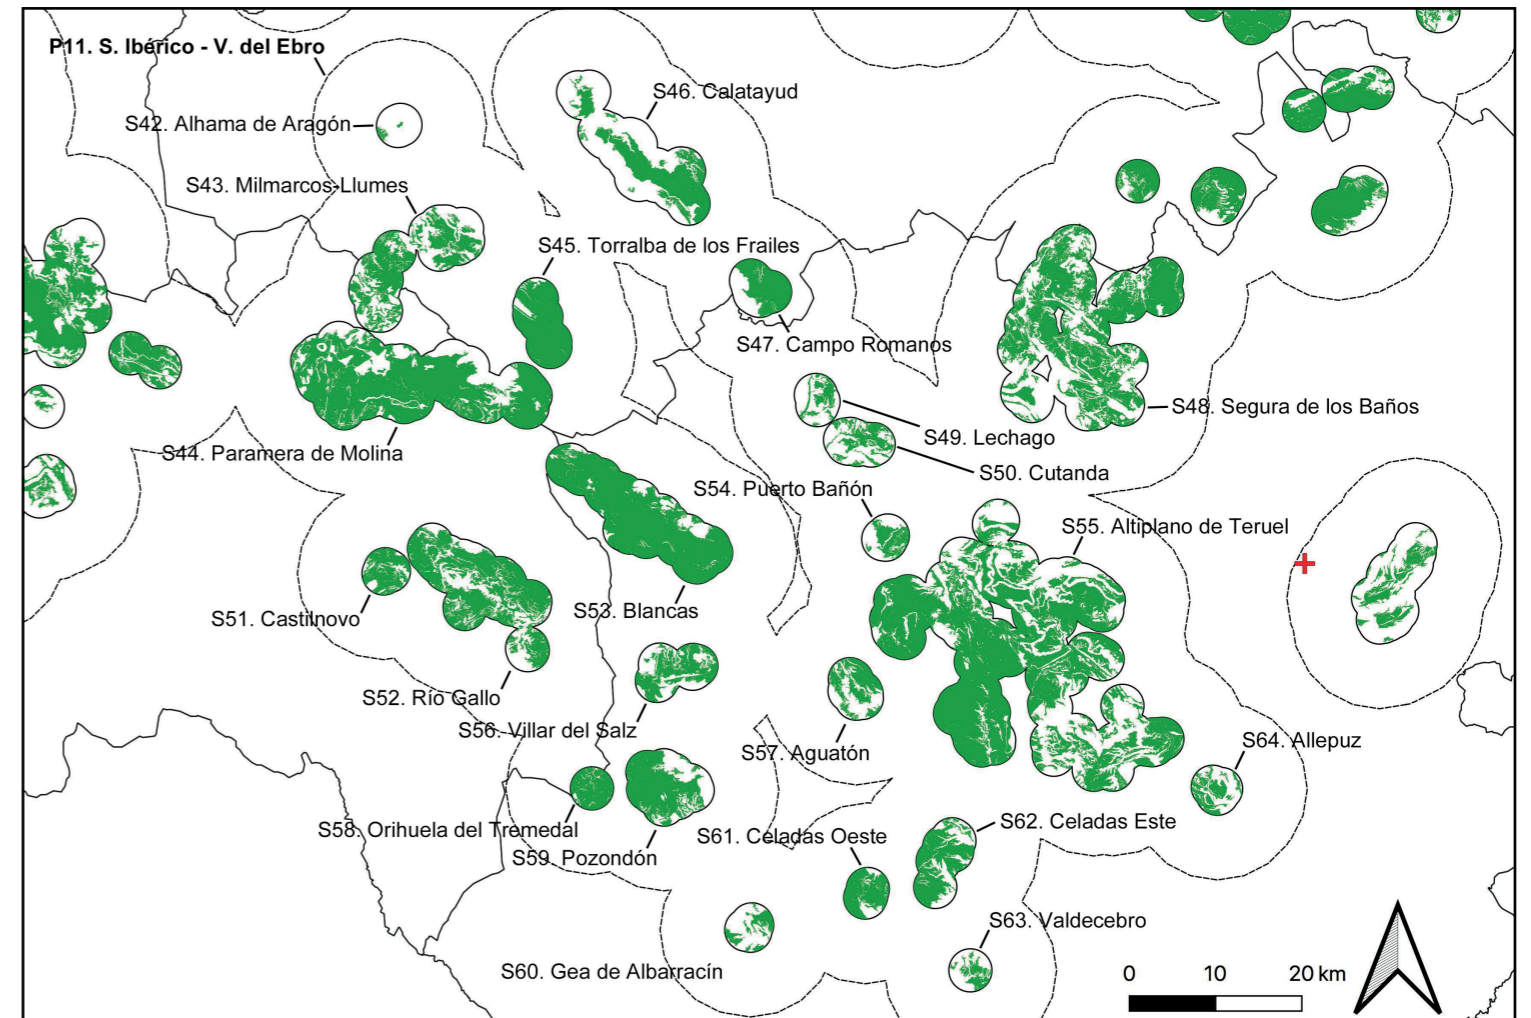

**Population n° 11: S. Ibérico - V. del Ebro.** 61 subpopulations: Alagón, Utebo, Juslibol, Lumpiaque, Val de Urrea, Longares-Mezalocha, Cuarte de Huerva, Belchite, Monegros, Gelsa, Laguna de Pito, Bujaraloz, Alforque, Azajla, Vinaceite, Lagata, Lécera, Albalate del Arzobispo.

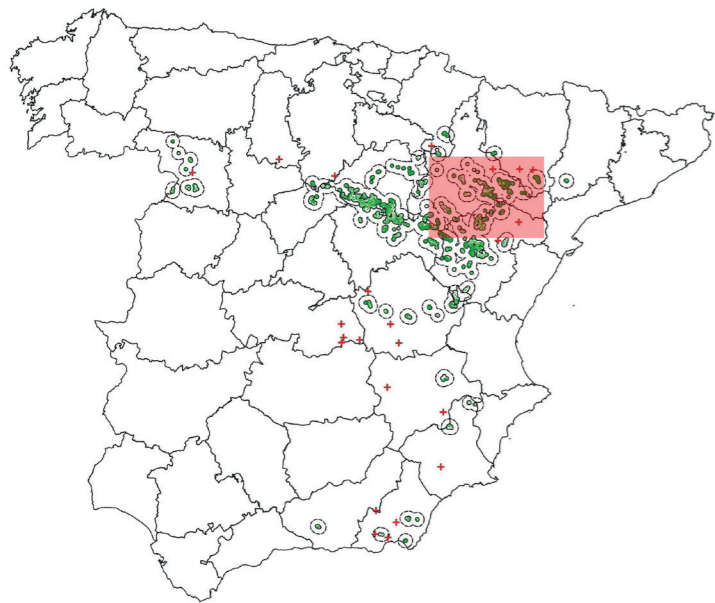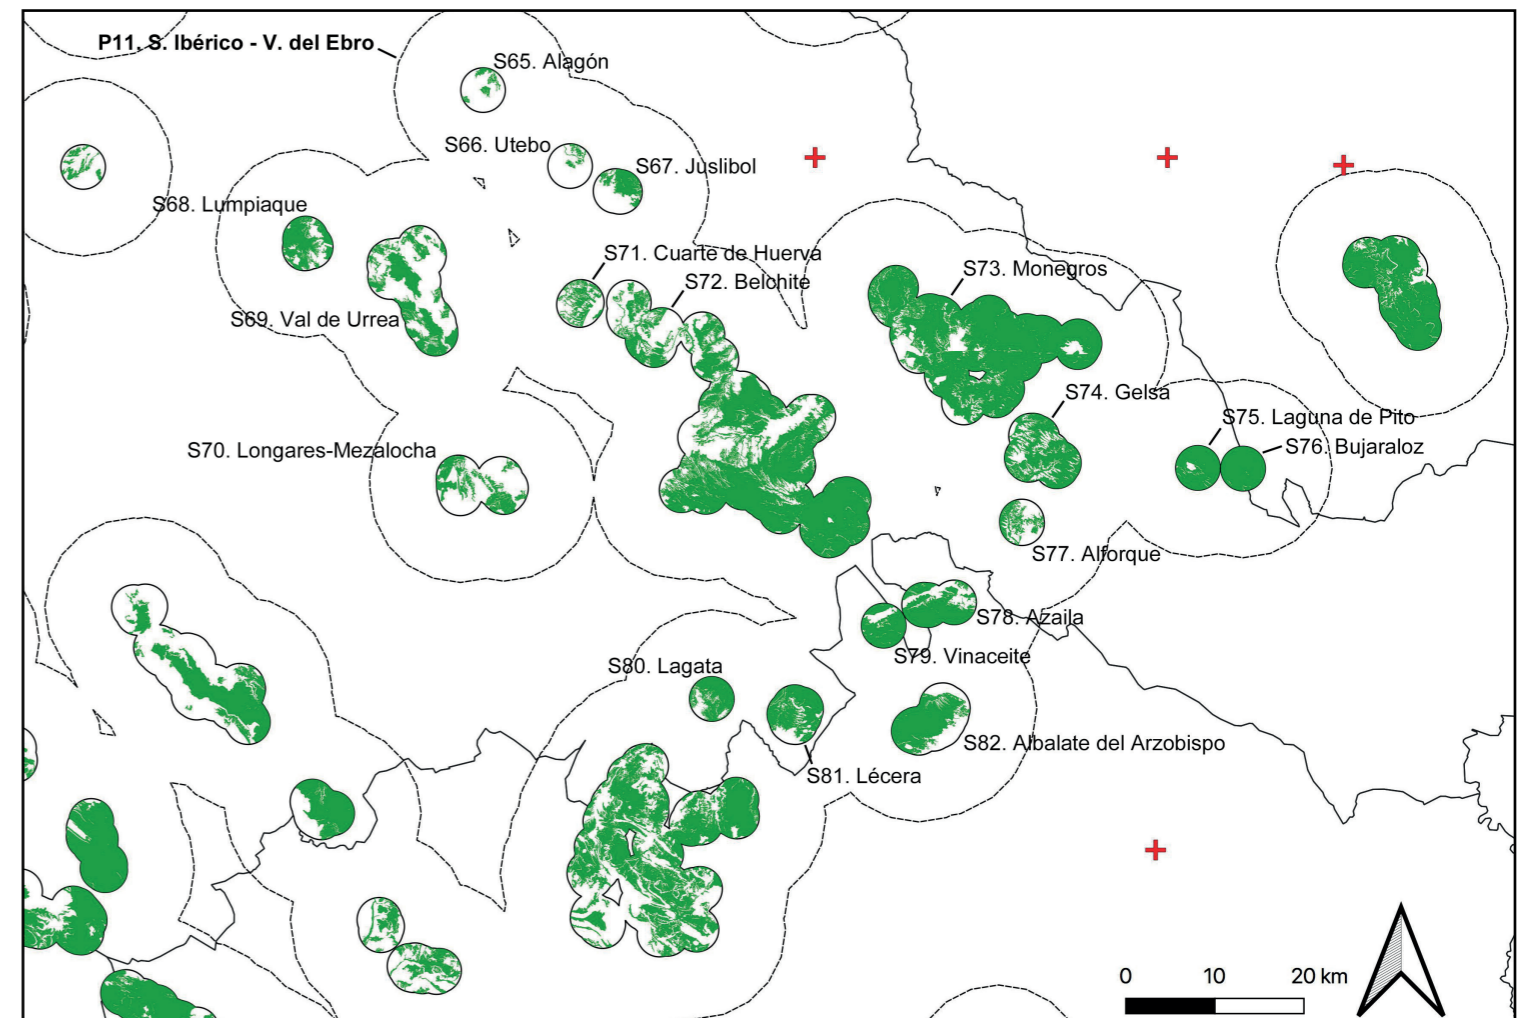

**Population n° 12: Ejulve.** 1 subpopulation: Molinos.

**Subpopulations of recent extinction (post-2000):** Gargallo-Ejulve, Alcañiz.

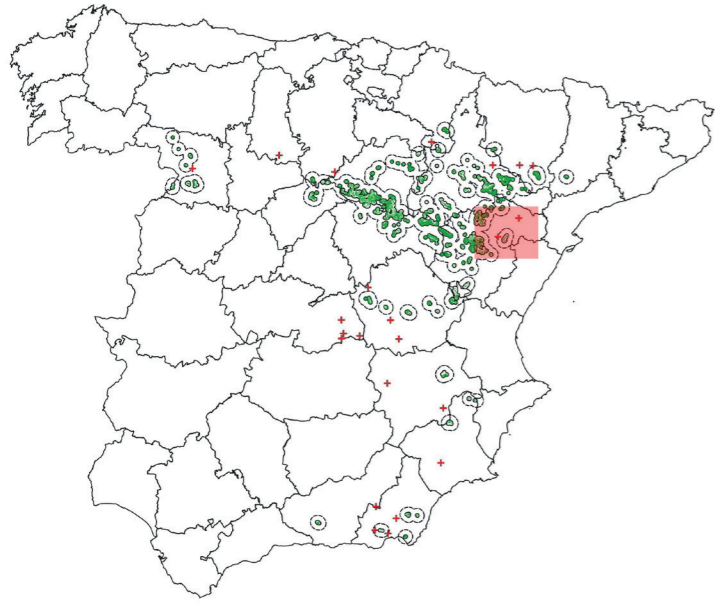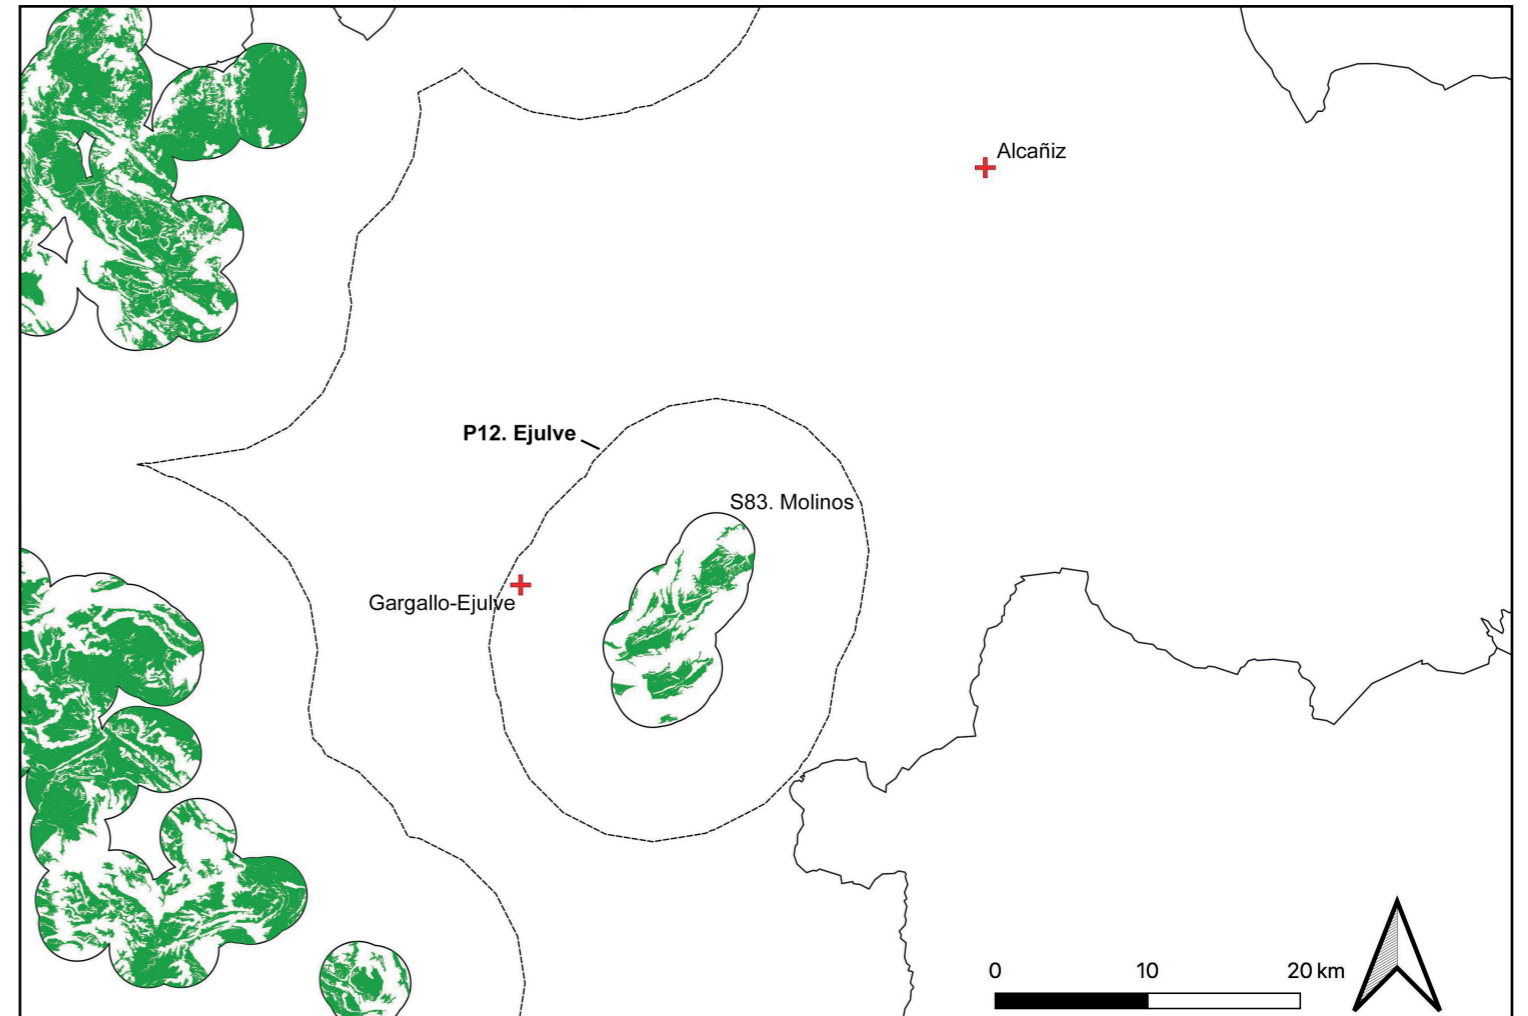

**Population n° 13: Uclés-Saelices.** 1 subpopulation: Saelices.

**Population n° 14: Zafra de Záncara.** 1 subpopulation: Zafra de Záncara.

**Population n° 15: Valeria.** 1 subpopulation: Valeria.

**Population n° 16: Carboneras de Guadazaón.** 2 subpopulations: Carboneras de Guadazaón, Cardenete.

**Population n° 17: Ademuz.** 3 subpopulations: Moya, Ademuz, Sierra de Javalambre.

**Subpopulations of recent extinction (post-2000):** Lillo, Quero, Pastrana, Saceda-Trasierra, Los Tomillares, La Hinojosa, Villar de Cantos.

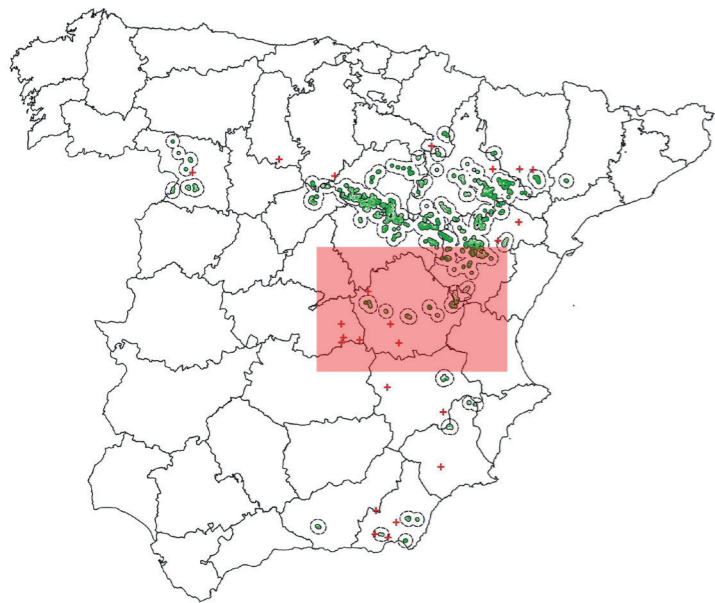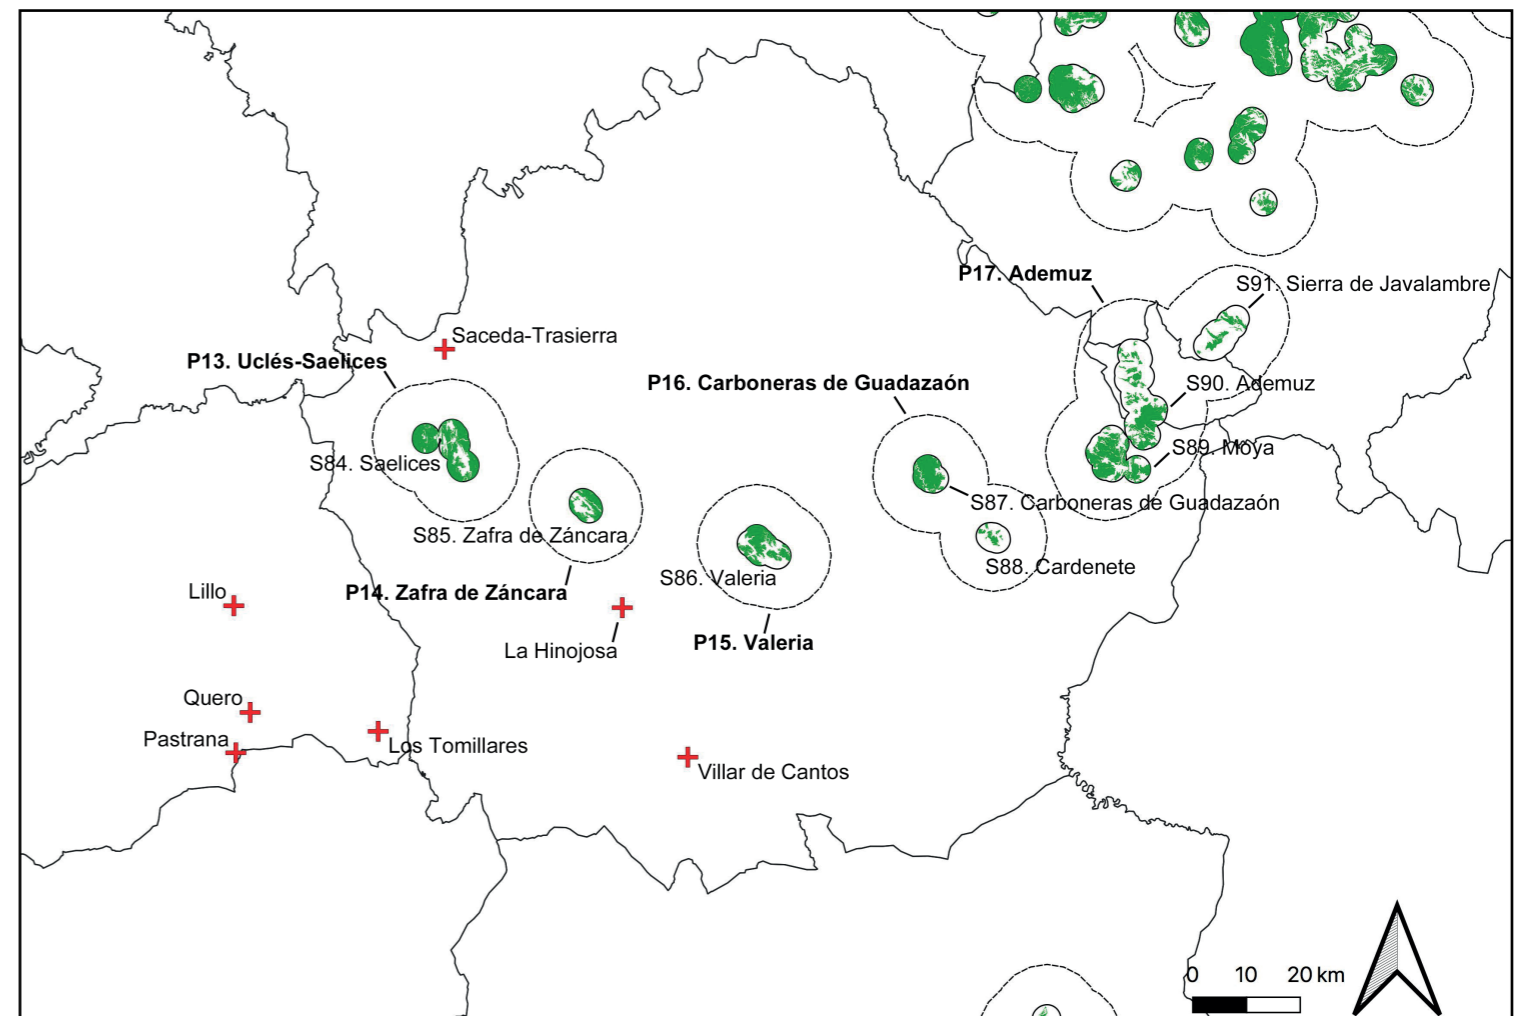

**Population n° 18: Hoya Gonzalo.** 1 subpopulation: Hoya Gonzalo.

**Population n° 19: Yecla.** 2 subpopulations: Herrada del Manco, Moratillas.

**Population n° 20: Cieza.** 1 subpopulation: Sierra del Picarcho.

**Subpopulations of recent extinction (post-2000):** El Balletero, Las joaquinas.

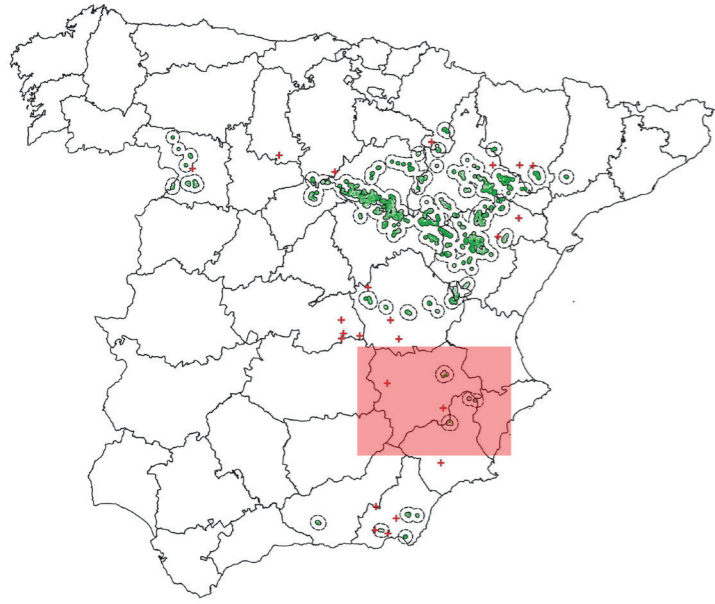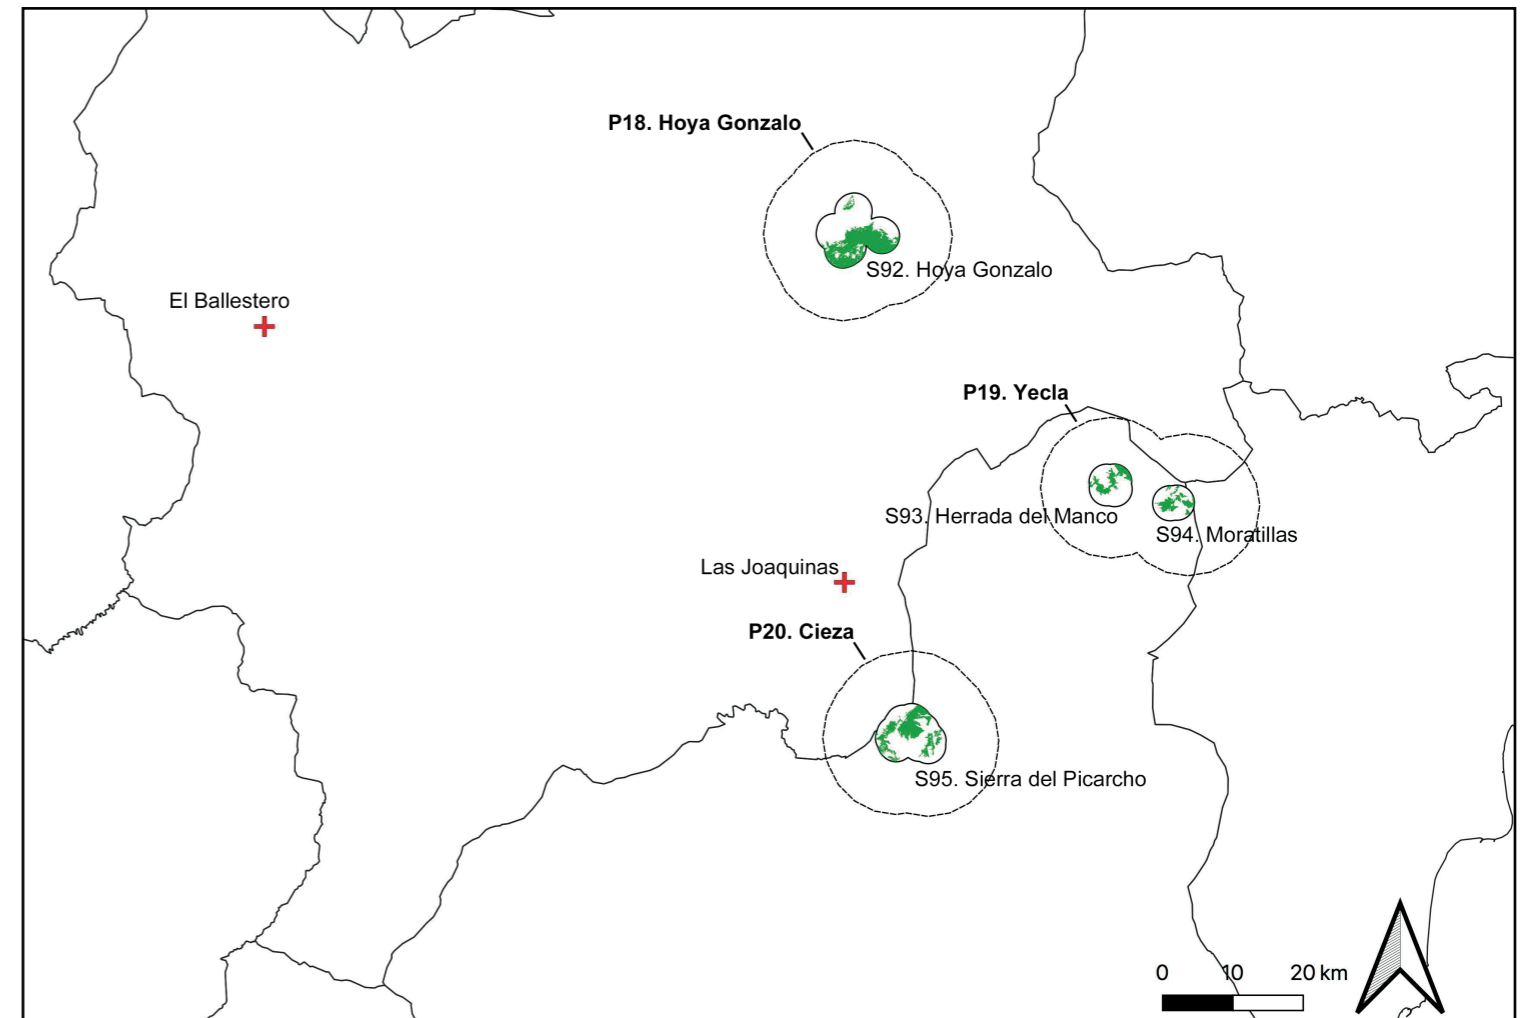

**Population n° 21: Padul.** 1 subpopulation: Padul.

**Population n° 22: Sierra de Gádor.** 1 subpopulation: LLano de Los Brincos-La Mota.

**Population n° 23: Tabernas-Sorbas.** 2 subpopulations: Los Sebastianes, Karst de Sorbas.

**Population n° 24: Cabo de Gata.** 1 subpopulation: Las Amoladeras.

**Subpopulations of recent extinction (post-2000):** Llano de la Cabras, Cerro Villegas Los Pilares, Llano de Canjayar, La Campita.

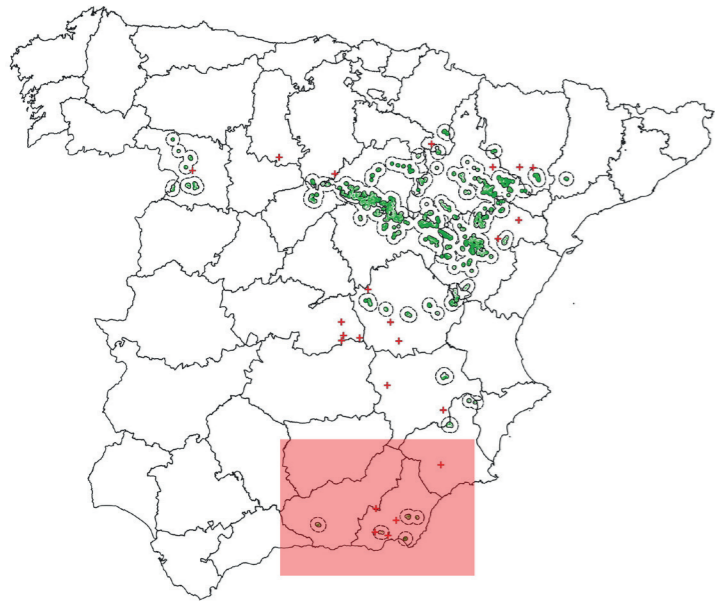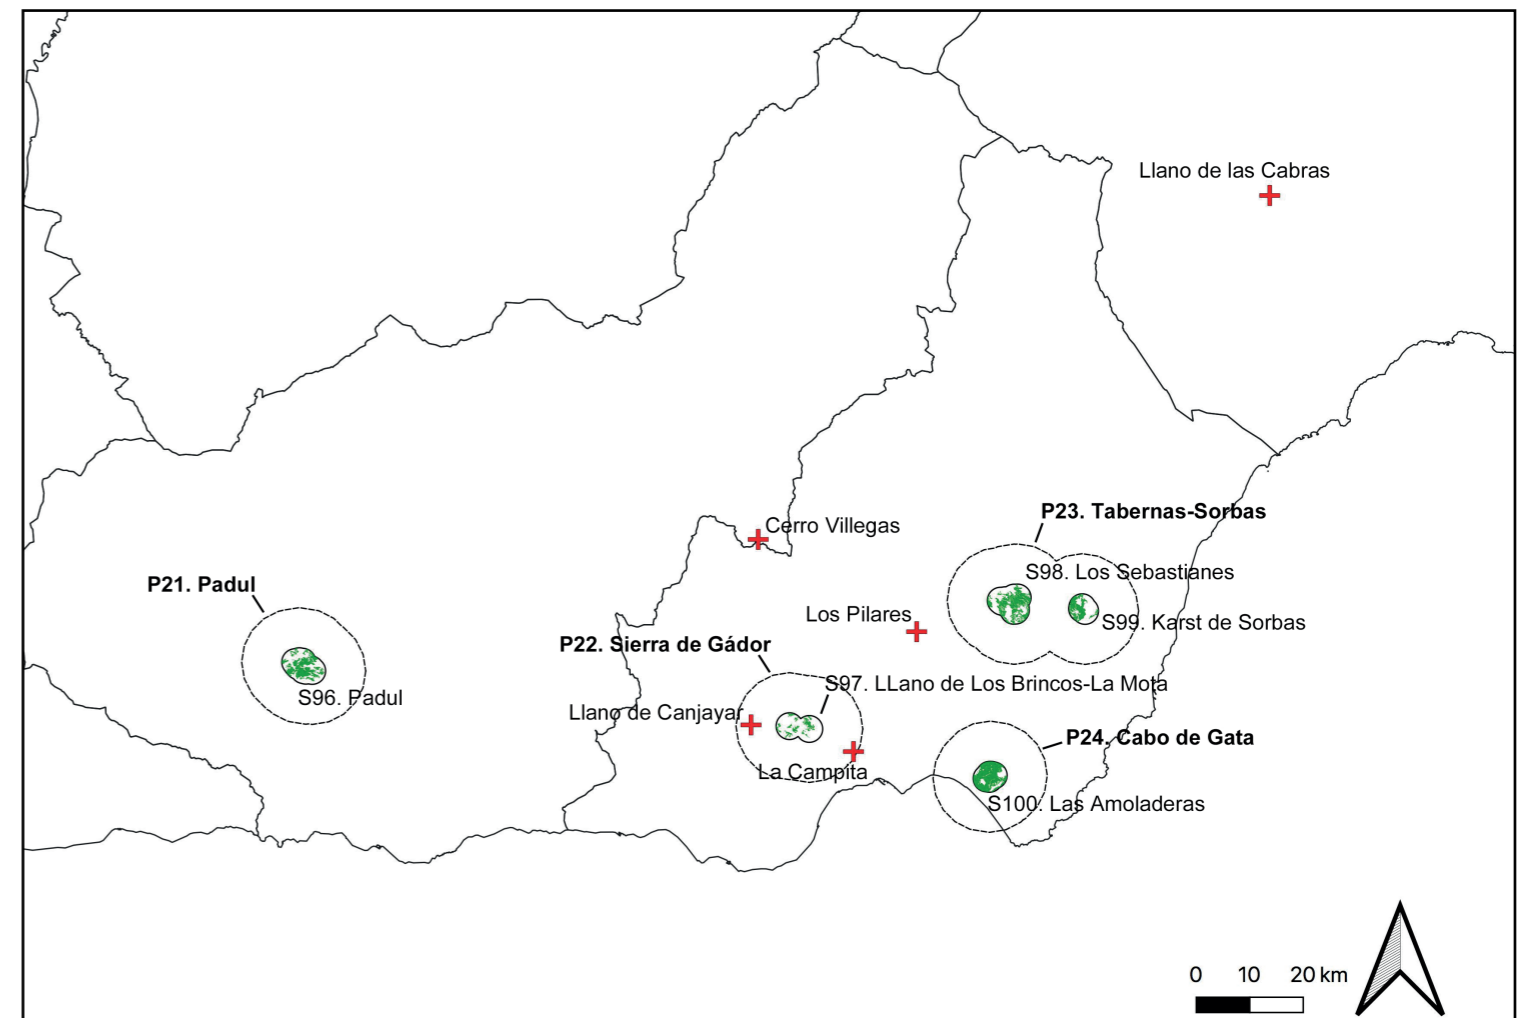

Supplement: Supplemental_Data_S1.pdf [file Supplemental_Data_S1.pdf]
