# Supplementary material for: Connectivity in Spanish metapopulation of Dupont’s lark may be maintained by dispersal over medium-distance range and stepping stones
Source: PeerJ. 2021 Aug 19;9:e11925. doi: 10.7717/peerj.11925 (PMC8380426; doi:10.7717/peerj.11925)
Supplement: Supplemental Information 6 — Excel file with the complete list of nodes importance and probability of connection in the different scenarios evaluated. [file peerj-09-11925-s006.xlsx]

## Sheet: Nodes importance without SS
			Scenario 1 (5 km movements, without stepping stones)				Scenario 2 (20 km movements, without stepping stones)				Scenario 3 (100 km movements, without stepping stones)
ID	Name	Province	dPC	dPCintra	dPCflux	dPCconnector	dPC	dPCintra	dPCflux	dPCconnector	dPC	dPCintra	dPCflux	dPCconnector
73	Monegros	Z	40.9876	33.3444	7.63646	0.0067128	33.7853	20.0299	13.4755	0.279869	25.4982	5.5225	19.7034	0.272388
74	Gelsa	Z	8.99338	1.15899	7.05611	0.77828	11.0998	0.696202	7.80565	2.59795	7.7017	0.191952	5.34798	2.16177
45	Torralba de los Frailes	TE	9.97787	4.15757	5.82015	0.000156	13.6223	2.49744	11.0736	0.0512389	12.0545	0.688576	11.297	0.0689098
44	Paramera de Molina	GU	9.09975	1.38594	5.33027	2.38354	15.368	0.832534	7.88757	6.64794	15.06	0.22954	6.93579	7.89467
53	Blancas	TE	21.2918	17.7659	3.52258	0.0033975	26.8453	10.6719	15.1398	1.03351	27.4034	2.94238	20.8628	3.59825
77	Alforque	Z	1.22505	0.16003	1.04688	0.0181357	3.88799	0.0961299	2.54007	1.25179	3.95394	0.0265042	2.05918	1.86826
12	Pinilla del Campo	SO	2.51008	1.48979	1.02016	0.0001257	2.49936	0.894916	1.54933	0.0551182	4.27656	0.246739	3.54776	0.482064
43	Milmarcos-Llumes	GU	1.04754	0.0270597	1.01896	0.0015157	1.40983	0.0162547	1.28372	0.109864	1.93342	0.0044816	1.02166	0.90727
11	Pozalmuro	SO	1.13189	0.127783	0.889124	0.11498	1.10691	0.0767587	0.822866	0.207283	1.31756	0.0211633	1.13985	0.156542
26	Cenegro	SO	1.61344	0.79315	0.820231	5.99e-05	3.16498	0.476443	2.6081	0.0804306	4.71397	0.131361	4.18051	0.402102
29	Nafría la Llana	SO	1.6173	0.828886	0.777829	0.0105866	1.85077	0.49791	1.2293	0.123561	3.67535	0.13728	3.27971	0.258357
30	Fuentelárbol	SO	1.15468	0.389593	0.764795	0.0002892	1.52957	0.234028	1.05153	0.244006	2.91412	0.0645243	2.33484	0.514764
32	Altos de Barahona	SO	1.62679	0.0973214	0.703865	0.825604	4.89441	0.0584607	1.26933	3.56662	8.67169	0.0161183	1.57689	7.07867
37	La Torresaviñán	GU	1.77435	1.10141	0.672937	0	3.4836	0.661615	2.82199	0	5.02812	0.182415	4.84571	1e-07
59	Pozondón	TE	1.15342	0.495963	0.649341	0.0081121	2.7161	0.297924	1.91423	0.503949	4.12301	0.0821412	3.50588	0.534982
58	Orihuela del Tremedal	TE	1.89793	1.25369	0.644178	6.33e-05	3.03716	0.753089	2.27706	0.007011	5.42416	0.207636	5.21273	0.0037951
36	Layna	SO	1.5521	0.0723134	0.613248	0.866537	5.77023	0.0434385	1.14712	4.57968	9.67399	0.0119765	1.38477	8.27725
31	Brías	SO	0.565355	0.0475107	0.517845	0	0.932708	0.0285396	0.904169	0	1.11455	0.0078687	1.10669	1e-07
41	Maranchón	GU	0.603627	0.207206	0.394973	0.0014478	3.34038	0.124468	1.66897	1.54694	5.24611	0.0343174	2.34866	2.86313
10	Aldealpozo	SO	0.668326	0.263113	0.349711	0.0555021	1.46142	0.158051	0.942411	0.360958	1.86261	0.0435767	1.52677	0.292271
72	Belchite	Z	1.43768	1.13557	0.294476	0.007637	4.73049	0.682133	3.34455	0.703808	7.07875	0.188072	5.08523	1.80544
34	Conquezuela	SO	0.308676	0.0145865	0.280803	0.0132865	0.571411	0.0087621	0.522363	0.0402858	0.645538	0.0024158	0.624321	0.0188016
52	Río Gallo	GU	0.478574	0.204788	0.260611	0.0131748	1.88162	0.123016	1.30667	0.451934	2.5302	0.033917	2.24614	0.250138
51	Castilnovo	GU	0.339289	0.0885424	0.250746	0	0.9424	0.0531872	0.889212	0	1.49773	0.0146644	1.48295	0.0001196
9	Arancón	SO	0.676188	0.435093	0.235621	0.005474	1.30231	0.26136	0.933981	0.106967	2.10503	0.07206	1.87381	0.159159
71	Cuarte de Huerva	Z	0.229219	0.0134162	0.215454	0.0003493	0.60083	0.0080591	0.47594	0.11683	0.93338	0.002222	0.584669	0.346489
81	Lécera	Z	2.27428	2.10341	0.169972	0.000895	4.41502	1.26351	2.80993	0.341575	10.0635	0.348366	7.21863	2.49648
24	Los Castros	SG	0.345753	0.194666	0.151072	1.48e-05	0.361505	0.116936	0.229254	0.0153146	1.24723	0.0322406	1.13768	0.0773054
25	Hoces del Duratón	SG	0.246346	0.0954038	0.150942	0	0.252943	0.0573088	0.195634	0	0.803489	0.0158008	0.787611	7.77e-05
55	Altiplano de Teruel	TE	0.334392	0.172486	0.143101	0.0188051	1.99386	0.103612	0.982019	0.908228	6.13544	0.028567	2.33153	3.77534
75	Laguna de Pito	Z	0.263138	0.123263	0.137215	0.0026602	0.944874	0.0740437	0.695788	0.175042	1.48988	0.0204147	1.36839	0.10108
76	Bujaraloz	Z	0.173423	0.0386362	0.134784	2.4e-06	0.451475	0.0232087	0.421984	0.0062827	0.78601	0.0063989	0.774575	0.0050355
80	Lagata	Z	0.26759	0.147698	0.119893	0	0.914316	0.0887216	0.825595	0	1.97514	0.0244616	1.95067	1e-07
78	Azaila	TE	0.181723	0.0630376	0.108725	0.00996	2.32275	0.0378665	1.0079	1.27699	3.86756	0.0104403	1.33957	2.51756
62	Celadas Este	TE	0.394267	0.296192	0.0960751	0.0019992	1.07824	0.177922	0.73597	0.164343	3.10982	0.0490553	2.58127	0.479496
79	Vinaceite	TE	0.124036	0.0215189	0.0926684	0.0098488	1.42583	0.0129264	0.605813	0.807096	2.76672	0.003564	0.78829	1.97487
27	Atauta	SO	0.100055	0.0077177	0.0923372	0	0.304136	0.004636	0.2995	0	0.430324	0.0012782	0.429046	1e-07
57	Aguatón	TE	0.20904	0.125893	0.0831162	3.1e-05	0.894454	0.0756239	0.748916	0.0699143	2.284	0.0208504	1.94986	0.313295
61	Celadas Oeste	TE	0.245667	0.162475	0.0830905	0.0001012	0.608246	0.0975984	0.481619	0.0290284	1.86831	0.0269091	1.80371	0.0376949
54	Puerto Bañón	TE	0.102305	0.0382281	0.0625641	0.0015124	0.610307	0.0229635	0.487253	0.10009	1.19702	0.0063313	1.11118	0.0795085
56	Villar del Salz	TE	0.10188	0.0443784	0.0508883	0.0066131	2.18465	0.026658	0.855707	1.30229	2.18135	0.0073499	1.20062	0.973382
48	Segura de los Baños	TE	0.174944	0.131116	0.0435818	0.0002458	1.54404	0.0787613	0.749574	0.715707	10.1846	0.0217155	1.94386	8.21905
82	Albalate del Arzobispo	TE	0.645436	0.607194	0.0382422	0	1.95732	0.36474	1.59218	0.0003982	3.81881	0.100563	3.70701	0.011233
28	Las Fraguas	SO	0.148842	0.114036	0.0348037	2e-06	0.501026	0.0685012	0.374144	0.0583804	1.37688	0.0188866	1.15092	0.207072
38	Hortezuela de Océn	GU	0.0448075	0.0110052	0.0338024	0	0.280381	0.0066108	0.273771	0	0.489181	0.0018227	0.487359	1e-07
39	Riba de Saelices	GU	0.0853236	0.0533643	0.0319593	0	0.507446	0.0320558	0.47539	0	1.03642	0.0088382	1.02081	0.0067656
8	Velilla de la Sierra	SO	0.0547889	0.0260964	0.0286877	4.9e-06	0.271507	0.0156761	0.208279	0.0475515	0.606221	0.0043221	0.469993	0.131906
35	Sigüenza	GU	0.0347458	0.0060634	0.0286824	0	0.215589	0.0036423	0.211947	0	0.367626	0.0010042	0.366622	1e-07
89	Moya	CU	0.0507646	0.0226733	0.0280912	1e-07	0.0462901	0.0136198	0.0307514	0.0019188	0.457825	0.0037551	0.337085	0.116985
90	Ademuz	V	0.0374631	0.0091704	0.0279873	0.0003054	0.0412864	0.0055087	0.0258531	0.0099245	0.4699	0.0015188	0.216461	0.25192
40	Cueva de la Hoz	GU	0.0644404	0.0006905	0.0229105	0.0408394	0.358323	0.0004148	0.0892336	0.268675	0.283363	0.0001144	0.128854	0.154394
64	Allepuz	TE	0.0301373	0.0110052	0.0191322	0	0.191489	0.0066108	0.184879	0	0.549522	0.0018227	0.5477	1e-07
47	Campo Romanos	Z	1.48945	1.47038	0.0190584	1.63e-05	1.94965	0.883254	1.04541	0.0209838	5.7907	0.243524	5.49188	0.0552894
46	Calatayud	Z	0.119474	0.102693	0.016781	1e-07	0.622719	0.0616876	0.555126	0.0059052	1.82633	0.017008	1.60558	0.203739
49	Lechago	TE	0.0227635	0.0071334	0.0142375	0.0013926	0.360227	0.004285	0.182923	0.173019	0.741548	0.0011814	0.466598	0.273768
50	Cutanda	TE	0.0204672	0.0047616	0.0136154	0.0020902	0.357424	0.0028603	0.152545	0.202018	0.692669	0.0007886	0.382969	0.308912
67	Juslibol	Z	0.0887303	0.0755324	0.0129971	0.0002008	0.45716	0.0453722	0.401739	0.0100485	1.22017	0.0125097	1.13562	0.0720404
69	Val de Urrea	Z	0.0331721	0.0251648	0.0079458	6.15e-05	0.265065	0.0151164	0.156558	0.0933908	1.19994	0.0041678	0.633921	0.561855
68	Lumpiaque	Z	0.0801858	0.0725905	0.0075953	0	0.194119	0.043605	0.149019	0.001495	1.2352	0.0120224	0.999621	0.223557
14	Aranda de Moncayo	Z	0.0580784	0.0518092	0.0062435	2.58e-05	0.235138	0.0311216	0.15206	0.0519559	1.66613	0.0085806	0.831825	0.825723
15	Deza	SO	0.0944612	0.0886623	0.0057989	0	0.20466	0.0532593	0.144054	0.0073467	1.26846	0.0146842	1.10811	0.145668
66	Utebo	Z	0.0058682	0.0002427	0.0055203	0.0001053	0.0368933	0.0001458	0.0246612	0.0120862	0.206053	4.02e-05	0.0643994	0.141614
63	Valdecebro	TE	0.0045197	0.0022792	0.0022404	2e-07	0.0476361	0.0013691	0.0422279	0.0040389	0.286276	0.0003775	0.200447	0.0854511
42	Alhama de Aragón	Z	0.0021515	0.0005534	0.0015979	2e-07	0.101138	0.0003324	0.0619607	0.0388452	0.595256	9.16e-05	0.122154	0.473011
6	Villaseco del Pan	ZA	0.0064766	0.0051958	0.0012805	3e-07	0.0089977	0.0031211	0.0053337	0.0005428	0.0096071	0.0008605	0.0079063	0.0008404
7	Almaraz de Duero	ZA	0.0061051	0.0048267	0.0012784	0	0.0075973	0.0028994	0.0046979	0	0.0091141	0.0007994	0.0075422	0.0007726
98	Los Sebastianes	AL	0.0655449	0.0648487	0.0006962	0	0.052805	0.0389545	0.0138495	9e-07	0.0380663	0.0107402	0.0272943	3.19e-05
99	Karst de Sorbas	AL	0.0111725	0.0104763	0.0006961	0	0.0176185	0.0062931	0.0113254	0	0.0158983	0.0017351	0.0141632	1e-07
60	Gea de Albarracín	TE	0.0072679	0.0066212	0.0006467	0	0.082045	0.0039773	0.0769281	0.0011395	0.395508	0.0010966	0.348437	0.045974
22	Páramo de Corcos	BU	0.118059	0.117424	0.0006343	0	0.199095	0.0705365	0.128559	0	1.00008	0.0194478	0.979643	0.0009862
23	Hoces del Riaza	SG	0.00395	0.0034022	0.0005385	9.3e-06	0.17601	0.0020437	0.0573147	0.116651	0.84196	0.0005635	0.213997	0.6274
91	Sierra de Javalambre	TE	0.0149139	0.014406	0.0005079	0	0.0309399	0.0086536	0.0201696	0.0021166	0.404361	0.0023859	0.31504	0.0869352
33	Hiendelaencina	GU	0.0047613	0.0043996	0.0003616	0	0.0638941	0.0026429	0.0612513	0	0.250017	0.0007287	0.249288	1e-07
65	Alagón	Z	0.0012543	0.0011423	0.0001121	0	0.0185913	0.0006861	0.0174921	0.000413	0.232561	0.0001892	0.114077	0.118295
94	Moratillas	MU	0.0021315	0.002035	9.65e-05	0	0.0015042	0.0012224	0.0002801	1.6e-06	0.003858	0.000337	0.0034806	4.05e-05
93	Herrada del Manco	MU	0.000147	5.05e-05	9.65e-05	0	0.0002742	3.03e-05	0.0002438	0	0.0005899	8.4e-06	0.0005815	1e-07
70	Longares-Mezalocha	Z	0.012778	0.0126925	8.55e-05	0	0.0743859	0.0076244	0.0660752	0.0006862	0.474231	0.0021021	0.459836	0.0122932
4	Tábara	ZA	0.0224782	0.0224179	6.03e-05	0	0.016876	0.0134664	0.0034097	0	0.0154721	0.0037128	0.0116706	8.88e-05
5	Vegalatrave	ZA	0.0033848	0.0033256	5.92e-05	0	0.00525	0.0019977	0.0031395	0.0001127	0.0073532	0.0005508	0.0062115	0.000591
87	Carboneras de Guadazaón	CU	0.49688	0.49683	5e-05	0	0.307362	0.298445	0.0089151	2.1e-06	0.807294	0.0822849	0.723211	0.001798
88	Cardenete	CU	0.0001977	0.0001477	5e-05	0	0.0027352	8.87e-05	0.0026464	0	0.0175857	2.45e-05	0.0171974	0.0003638
13	Dévanos	SO	0.0017484	0.0017183	3.01e-05	0	0.0165201	0.0010322	0.0143014	0.0011865	0.148959	0.0002846	0.101631	0.047043
20	Ballobar	HU	0.473837	0.473832	4.5e-06	0	0.397877	0.28463	0.113227	2.06e-05	1.65928	0.078476	1.57596	0.0048499
16	Ablitas	NA	0.0234407	0.0234379	2.8e-06	0	0.0326424	0.0140791	0.0179452	0.000618	0.513177	0.0038818	0.347607	0.161688
1	Fariza	ZA	0.0247995	0.0247969	2.6e-06	0	0.0172996	0.0148954	0.0024042	0	0.0150236	0.0041069	0.0109167	1e-07
17	Bardenas	NA	2.64352	2.64352	2.4e-06	0	1.60459	1.58796	0.0166286	0	2.40813	0.437819	1.97031	1e-07
3	Villanueva de Valrojo	ZA	0.0003064	0.0003048	1.7e-06	0	0.0008688	0.0001831	0.0006066	7.9e-05	0.0019988	5.05e-05	0.0016138	0.0003346
18	Talamantes	Z	0.0009777	0.000977	7e-07	0	0.0045745	0.0005869	0.0038034	0.0001841	0.145948	0.0001618	0.0959281	0.0498579
84	Saelices	CU	0.0391177	0.0391172	5e-07	0	0.0243774	0.0234976	0.0008798	0	0.0722459	0.0064786	0.0657673	1e-07
85	Zafra de Záncara	CU	0.002698	0.0026976	5e-07	0	0.0026026	0.0016204	0.0009637	1.84e-05	0.0232878	0.0004468	0.0209119	0.0019292
2	Donadillo	ZA	0.0040028	0.0040023	5e-07	0	0.0027658	0.0024041	0.0003617	0	0.0041776	0.0006629	0.0035148	1e-07
83	Molinos	TE	0.0095604	0.0095603	1e-07	0	0.0153273	0.0057429	0.0095844	0	0.296458	0.0015834	0.294874	1e-07
19	Tardienta	HU	0.113689	0.113689	0	0	0.0925908	0.0682925	0.0242983	0	0.717754	0.0188291	0.698925	1e-07
86	Valeria	CU	0.0053273	0.0053273	0	0	0.0045396	0.0032001	0.001326	1.34e-05	0.0479836	0.0008823	0.0441824	0.002919
21	Alfés	L	0.0020462	0.0020462	0	0	0.0014778	0.0012291	0.0002486	0	0.040546	0.0003389	0.0402071	1e-07
92	Hoya Gonzalo	AB	0.0696362	0.0696362	0	0	0.0418604	0.0418303	3.01e-05	0	0.0493403	0.0115331	0.037318	0.0004893
100	Las Amoladeras	AL	0.256666	0.256666	0	0	0.158146	0.154179	0.0039671	0	0.0704396	0.042509	0.0279306	1e-07
95	Sierra del Picarcho	MU	0.0071618	0.0071618	0	0	0.0043209	0.0043021	1.88e-05	0	0.0047746	0.0011861	0.0035614	2.72e-05
97	LLano de Los Brincos-La Mota	AL	0.0001703	0.0001703	0	0	0.0002147	0.0001023	0.0001124	0	0.0014589	2.82e-05	0.0013888	4.21e-05
96	Padul	GR	0.0009693	0.0009693	0	0	0.0005823	0.0005823	0	0	0.0004325	0.0001605	0.000272	1e-07

## Sheet: Nodes importance with SS
			Scenario 4 (5 km movements, with stepping stones)				Scenario 5 (20 km movements, with stepping stones)				Scenario 6 (100 km movements, with stepping stones)
ID	Name	Province	dPC	dPCintra	dPCflux	dPCconnector	dPC	dPCintra	dPCflux	dPCconnector	dPC	dPCintra	dPCflux	dPCconnector
73	Monegros	Z	28.9574	12.558	14.0251	2.37438	20.4558	4.49372	13.4953	2.46682	17.1936	1.24095	15.007	0.945626
53	Blancas	TE	25.297	6.69088	14.7674	3.83868	24.6975	2.39425	16.333	5.97025	16.2776	0.661177	12.9385	2.67788
45	Torralba de los Frailes	TE	9.49318	1.5658	7.63765	0.289736	8.76292	0.560302	8.08475	0.117875	6.60117	0.154729	6.42219	0.0242532
17	Bardenas	NA	3.18755	0.995588	1.8086	0.383364	1.1954	0.356259	0.740287	0.0988507	2.2648	0.0983817	2.02596	0.140453
81	Lécera	Z	2.71787	0.792174	1.77344	0.152253	6.13505	0.28347	5.00287	0.848709	5.1728	0.0782808	4.73908	0.355431
12	Pinilla del Campo	SO	1.14263	0.561078	0.547355	0.0341955	0.714609	0.200775	0.468558	0.0452762	1.82405	0.0554444	1.57427	0.194334
47	Campo Romanos	Z	0.799314	0.553766	0.233122	0.012426	2.75867	0.198158	2.31104	0.249465	3.59666	0.0547218	3.42951	0.112429
44	Paramera de Molina	GU	12.3303	0.521966	6.10904	5.69932	9.84408	0.186779	5.24554	4.41176	7.68932	0.0515795	3.83662	3.80112
58	Orihuela del Tremedal	TE	4.74021	0.472158	4.22992	0.0381319	5.24034	0.168956	5.06529	0.0060863	3.75144	0.0466575	3.70438	0.0003985
74	Gelsa	Z	7.3691	0.436492	4.78817	2.14444	5.5551	0.156193	3.73807	1.66085	3.5972	0.0431331	3.1871	0.366961
189	(E) Castronuño	VA	0.436348	0.436156	0.0001916	2e-07	0.165243	0.156073	0.0091311	3.9e-05	0.145594	0.0430999	0.100953	0.001541
72	Belchite	Z	2.32374	0.427671	1.30652	0.589542	6.74359	0.153037	3.4819	3.10866	6.19989	0.0422614	3.43763	2.71999
37	La Torresaviñán	GU	0.722233	0.414807	0.307426	2e-07	1.24555	0.148433	1.09711	0	2.51726	0.0409903	2.47627	0
29	Nafría la Llana	SO	0.626328	0.31217	0.305539	0.0086189	0.497941	0.111706	0.344726	0.0415086	1.70137	0.0308479	1.54382	0.126701
26	Cenegro	SO	0.735867	0.298712	0.420063	0.0170935	1.22525	0.10689	1.01443	0.103931	2.36611	0.029518	2.12404	0.212548
154	(E) Bardenas 2	NA	1.70472	0.29692	1.4078	2e-07	0.679588	0.106249	0.573339	0	1.18003	0.0293409	1.15069	0
82	Albalate del Arzobispo	TE	0.548811	0.228678	0.303412	0.0167219	1.88882	0.0818296	1.68001	0.126974	2.40129	0.0225974	2.31975	0.0589471
87	Carboneras de Guadazaón	CU	0.187132	0.187113	1.88e-05	2e-07	0.0750363	0.0669562	0.0080772	3e-06	0.700158	0.0184901	0.679082	0.0025857
59	Pozondón	TE	6.83295	0.186787	3.10565	3.54051	5.80566	0.0668393	3.38331	2.35551	2.83297	0.0184578	2.3722	0.442321
20	Ballobar	HU	0.178465	0.178452	1.3e-05	2e-07	0.132238	0.0638568	0.0683719	9.3e-06	0.992679	0.0176342	0.973397	0.001648
153	(E) Bardenas 1	NA	1.38541	0.171722	1.20988	0.0038048	0.617077	0.0614486	0.478351	0.0772768	1.71963	0.0169692	0.890122	0.812535
9	Arancón	SO	0.257077	0.163862	0.0910922	0.0021224	0.322806	0.0586361	0.236531	0.0276387	0.850105	0.0161925	0.780686	0.0532268
363	(E) Urueñas	SG	0.429643	0.153646	0.275997	2e-07	0.301865	0.0549802	0.246885	0	0.986503	0.0151829	0.97132	0
30	Fuentelárbol	SO	0.440631	0.146726	0.293772	0.0001325	0.427912	0.0525041	0.285912	0.0894964	1.37583	0.0144991	1.08828	0.273044
267	(E) Monegrillo 2	Z	4.30227	0.13006	3.61613	0.556079	2.47415	0.0465405	2.17919	0.248416	1.8345	0.0128523	1.75138	0.0702631
62	Celadas Este	TE	2.12127	0.11155	1.8406	0.169119	3.03072	0.0399169	2.5071	0.483698	2.12304	0.0110231	1.83919	0.272823
266	(E) Monegrillo 1	Z	1.72315	0.107028	1.50181	0.114311	1.96561	0.0382986	1.6512	0.276107	1.67013	0.0105762	1.53113	0.128418
10	Aldealpozo	SO	0.261948	0.099092	0.139629	0.023227	0.375661	0.0354588	0.241288	0.0989144	0.778617	0.009792	0.639681	0.129144
146	(E) Azuara 1	Z	0.536901	0.0980312	0.423607	0.0152629	1.66532	0.0350792	1.58214	0.0481039	1.66904	0.0096872	1.64593	0.0134283
100	Las Amoladeras	AL	0.0966644	0.0966641	3e-07	2e-07	0.037568	0.03459	0.002978	0	0.0252874	0.0095521	0.0157353	0
41	Maranchón	GU	0.474366	0.0780368	0.277669	0.118661	1.26727	0.0279245	0.700445	0.538902	1.74549	0.0077114	1.19351	0.544261
52	Río Gallo	GU	2.92208	0.0771262	1.22464	1.62032	3.92084	0.0275987	1.8383	2.05495	2.0073	0.0076214	1.47196	0.527715
347	(E) Torralba de los Sisones	TE	2.66219	0.0742394	2.58482	0.0031298	2.1586	0.0265656	2.12463	0.0074054	1.48977	0.0073362	1.48089	0.0015428
24	Los Castros	SG	0.254633	0.0733141	0.18096	0.0003595	0.258699	0.0262345	0.192007	0.0404569	0.832814	0.0072447	0.697599	0.127971
387	(E) Yunta	GU	2.46744	0.0711765	2.31188	0.0843881	2.05649	0.0254696	1.98375	0.0472656	1.45062	0.0070335	1.4349	0.00868
144	(E) Azaila 1	TE	0.948125	0.0697582	0.553132	0.325235	2.38882	0.0249621	1.45836	0.905494	1.75195	0.0068933	1.39583	0.349233
118	(E) Alfajarín 1	Z	3.38	0.0685409	2.69013	0.621322	2.78836	0.0245265	1.60629	1.15754	1.71219	0.0067731	1.27891	0.426508
55	Altiplano de Teruel	TE	3.9542	0.0649605	1.62072	2.26852	10.3059	0.0232453	2.01767	8.265	5.45608	0.0064192	1.42438	4.02528
61	Celadas Oeste	TE	1.3243	0.0611904	1.24293	0.0201875	1.85597	0.0218962	1.81494	0.0191311	1.36786	0.0060467	1.3577	0.0041116
77	Alforque	Z	1.42506	0.0602697	1.16456	0.200232	2.32579	0.0215668	1.38161	0.92261	1.54259	0.0059557	1.21726	0.319373
389	(E) Zaragoza 1	Z	0.239911	0.058164	0.141165	0.0405826	0.922918	0.0208133	0.631942	0.270163	1.23254	0.0057476	1.07958	0.147211
132	(E) Alustante	GU	4.07839	0.0581044	1.70416	2.31612	3.7474	0.0207919	1.85587	1.87073	1.71192	0.0057417	1.32106	0.385119
80	Lagata	Z	1.57015	0.055625	0.788437	0.726089	2.73047	0.0199047	1.48282	1.22774	1.70426	0.0054967	1.29552	0.403235
179	(E) Castejón de Monegros 1	HU	0.0875492	0.0550402	0.0308615	0.0016477	0.338672	0.0196954	0.28903	0.0299472	0.849499	0.0054389	0.819891	0.0241695
102	(E) Abanto 1	Z	1.88352	0.054529	1.82899	1e-07	1.71326	0.0195125	1.69375	0	1.25589	0.0053884	1.25051	0
106	(E) Alba	TE	11.2202	0.0527665	1.86552	9.30194	14.0354	0.0188818	1.89716	12.1193	5.3571	0.0052143	1.28157	4.07031
157	(E) Barracas	CS	0.0513067	0.0513033	3.3e-06	2e-07	0.0253486	0.0183583	0.0069904	0	0.407805	0.0050697	0.402736	0
300	(E) Pina de Ebro 2	Z	1.75261	0.0495973	1.68154	0.0214742	1.40488	0.0177478	1.30596	0.0811725	1.15448	0.0049011	1.08957	0.0600008
48	Segura de los Baños	TE	2.04578	0.0493803	0.731109	1.26529	11.6712	0.0176701	1.40997	10.2436	9.13946	0.0048796	1.22337	7.91122
11	Pozalmuro	SO	0.478076	0.0481247	0.380355	0.0495966	0.296395	0.0172208	0.219615	0.0595592	0.560382	0.0047556	0.483237	0.0723894
192	(E) Celadas	TE	4.47649	0.0479471	1.44494	2.9836	4.62647	0.0171573	1.72619	2.88312	2.01585	0.004738	1.22009	0.79102
57	Aguatón	TE	3.62547	0.0474132	1.48766	2.0904	2.99767	0.0169662	1.73718	1.24352	1.48001	0.0046853	1.21644	0.258882
75	Laguna de Pito	Z	0.202294	0.0464225	0.120105	0.0357667	0.759662	0.0166117	0.578421	0.16463	0.987943	0.0045874	0.898031	0.0853239
190	(E) Castroserna de Abajo	SG	0.0783178	0.046189	0.0310146	0.0011143	0.108884	0.0165282	0.0878658	0.0044902	0.471717	0.0045643	0.460543	0.0066099
287	(E) Ojos Negros 2	TE	1.37531	0.0459738	1.32934	2e-07	1.67103	0.0164511	1.65458	0	1.18408	0.004543	1.17954	0
22	Páramo de Corcos	BU	0.0583718	0.0442236	0.0141385	9.8e-06	0.134849	0.0158249	0.117918	0.0011059	0.674071	0.0043701	0.644111	0.0255905
28	Las Fraguas	SO	0.0562634	0.0429476	0.0133122	3.8e-06	0.127009	0.0153683	0.0963001	0.0153406	0.589775	0.004244	0.516251	0.0692795
19	Tardienta	HU	0.0571223	0.0428167	0.0142952	1.06e-05	0.167511	0.0153214	0.149482	0.0027072	0.661625	0.0042311	0.640931	0.0164632
127	(E) Almolda 2	Z	2.05104	0.0420443	2.00899	2e-07	1.2597	0.015045	1.24466	0	1.00356	0.0041547	0.999405	0
107	(E) Albalate del Arzobispo 1	TE	0.394961	0.0411869	0.298455	0.0553185	1.62821	0.0147382	1.1219	0.491577	1.31831	0.00407	1.08909	0.225149
108	(E) Albalate del Arzobispo 2	TE	0.274686	0.0389707	0.22874	0.0069756	0.772245	0.0139452	0.73431	0.0239892	0.98036	0.003851	0.969185	0.007324
126	(E) Almolda 1	Z	1.62226	0.0387298	1.58353	3e-07	1.15487	0.013859	1.13957	0.0014387	0.956401	0.0038272	0.950289	0.0022849
46	Calatayud	Z	0.063187	0.0386757	0.0229719	0.0015395	0.404814	0.0138396	0.354297	0.0366775	0.867691	0.0038218	0.815409	0.0484605
293	(E) Pedrola 1	Z	0.0874019	0.0373979	0.0465815	0.0034225	0.395745	0.0133824	0.296866	0.085497	1.06959	0.0036956	0.798613	0.26728
32	Altos de Barahona	SO	0.85096	0.0366526	0.330885	0.483422	2.21751	0.0131157	0.458934	1.74546	4.75688	0.0036219	0.783683	3.96957
25	Hoces del Duratón	SG	0.347618	0.0359304	0.213511	0.0981765	0.245986	0.0128573	0.150675	0.082453	0.628137	0.0035506	0.482236	0.142351
359	(E) Tramacastiel	TE	0.0435214	0.0345331	0.0089758	1.27e-05	0.434392	0.0123572	0.414614	0.007421	0.817688	0.0034125	0.80003	0.014246
15	Deza	SO	0.0389966	0.0333915	0.0055054	9.99e-05	0.095592	0.0119487	0.0738941	0.0097491	0.624676	0.0032997	0.536015	0.085362
51	Castilnovo	GU	0.780103	0.0333463	0.746756	2e-07	1.19566	0.0119326	1.18372	0	0.968491	0.0032952	0.965196	0
355	(E) Torremocha de Jiloca	TE	0.601071	0.0325361	0.568534	2e-07	1.18937	0.0116426	1.17773	0	0.97143	0.0032151	0.968215	0
201	(E) Cuerlas 1	Z	6.42705	0.029638	1.72114	4.67628	3.5029	0.0106056	1.35765	2.13465	1.59182	0.0029288	0.939184	0.649709
67	Juslibol	Z	0.141581	0.0284466	0.112905	0.0002305	0.464153	0.0101793	0.450917	0.0030569	0.764452	0.002811	0.759908	0.001733
68	Lumpiaque	Z	0.0779317	0.0273386	0.0504893	0.0001039	0.447647	0.0097828	0.427894	0.0099707	0.865165	0.0027015	0.762731	0.0997326
36	Layna	SO	0.7748	0.0272343	0.278616	0.46895	2.91063	0.0097454	0.419333	2.48155	5.59224	0.0026912	0.689348	4.9002
92	Hoya Gonzalo	AB	0.026226	0.026226	0	2e-07	0.0093915	0.0093846	6.8e-06	0	0.0354052	0.0025916	0.0323681	0.0004455
161	(E) Belchite 3	Z	0.367794	0.0260395	0.271428	0.0703267	1.33605	0.0093179	0.870313	0.456417	1.03043	0.0025732	0.84372	0.18414
138	(E) Anquela del Pedregal	GU	0.836136	0.0246726	0.711266	0.100197	1.12403	0.0088288	1.04562	0.0695729	0.85068	0.0024381	0.835028	0.0132146
98	Los Sebastianes	AL	0.0449131	0.0244229	0.0203777	0.0001126	0.0301214	0.0087394	0.0200257	0.0013563	0.0174444	0.0024134	0.0145587	0.0004723
78	Azaila	TE	0.517899	0.0237409	0.302338	0.191821	1.81729	0.0084954	0.850919	0.957875	1.19209	0.002346	0.818661	0.371087
263	(E) Mata de los Olmos	TE	0.0420484	0.0228105	0.0190584	0.0001797	0.344956	0.0081624	0.33609	0.0007042	0.672534	0.0022541	0.670148	0.0001318
288	(E) Oliete 1	TE	0.168077	0.0218702	0.139921	0.0062858	0.696114	0.007826	0.666281	0.022007	0.770331	0.0021612	0.759893	0.008277
137	(E) Anquela del Ducado	GU	0.19164	0.0207772	0.170863	2e-07	0.375449	0.0074348	0.368015	0	0.619218	0.0020532	0.617165	0
39	Riba de Saelices	GU	0.0338325	0.0200978	0.0137347	2e-07	0.176643	0.0071917	0.169451	0	0.509977	0.001986	0.506453	0.0015379
14	Aranda de Moncayo	Z	0.0251284	0.0195121	0.005433	0.0001835	0.0950546	0.0069822	0.0574976	0.0305748	0.802122	0.0019281	0.386155	0.414039
31	Brías	SO	0.257339	0.0178932	0.239446	2e-07	0.329896	0.0064029	0.323493	0	0.549915	0.0017682	0.548147	0
56	Villar del Salz	TE	7.96189	0.0167135	1.05363	6.89154	9.39766	0.0059807	1.07251	8.31917	3.4882	0.0016516	0.722779	2.76377
159	(E) Belchite 1	Z	0.308733	0.0160699	0.282436	0.0102279	0.703254	0.0057504	0.676997	0.0205069	0.67461	0.001588	0.668463	0.0045592
247	(E) Leciñena 1	Z	0.038497	0.0158859	0.0222167	0.0003946	0.312148	0.0056846	0.264771	0.0416928	0.547426	0.0015698	0.492788	0.0530684
275	(E) Moral de Hornuez	SG	0.028485	0.0155501	0.0127997	0.0001354	0.15615	0.0055644	0.111901	0.0386841	0.533756	0.0015366	0.410281	0.121939
374	(E) Villamol	LE	0.016225	0.0154099	0.0008151	2e-07	0.0086658	0.0055143	0.003146	5.5e-06	0.0331084	0.0015228	0.0304948	0.0010909
297	(E) Perdiguera 1	Z	0.202065	0.0153759	0.169872	0.0168181	0.522288	0.0055021	0.463849	0.0529372	0.570996	0.0015194	0.547258	0.0222184
150	(E) Balbases	BU	0.0243842	0.0151164	0.008833	0.000435	0.0243698	0.0054092	0.0170996	0.0018609	0.220009	0.0014938	0.198949	0.0195666
84	Saelices	CU	0.0147323	0.0147321	2e-07	2e-07	0.0054691	0.0052717	0.0001974	0	0.0314762	0.0014558	0.0300191	1.4e-06
76	Bujaraloz	Z	0.101948	0.0145509	0.0873958	1.2e-06	0.337906	0.0052069	0.328484	0.0042155	0.523614	0.0014379	0.503938	0.0182384
54	Puerto Bañón	TE	1.2493	0.0143973	0.830864	0.404034	1.41003	0.0051519	0.966202	0.438677	0.768687	0.0014227	0.672847	0.0944168
391	(E) Zaragoza 3	Z	0.0554197	0.0138698	0.0415498	2e-07	0.245119	0.0049631	0.240134	2.18e-05	0.502242	0.0013706	0.500834	3.77e-05
354	(E) Torregalindo	BU	0.0318171	0.0134031	0.0166664	0.0017477	0.110316	0.0047961	0.0823677	0.0231522	0.39902	0.0013245	0.366482	0.0312133
299	(E) Pina de Ebro 1	Z	2.17341	0.013384	1.0405	1.11953	1.02004	0.0047893	0.705055	0.310192	0.611333	0.0013226	0.568962	0.041049
294	(E) Pedrola 2	Z	0.06076	0.0131703	0.0411604	0.0064294	0.193574	0.0047128	0.16166	0.0272011	0.580343	0.0013015	0.463338	0.115704
130	(E) Alpanseque	SO	0.227237	0.0129662	0.212455	0.0018156	0.285169	0.0046398	0.278565	0.0019642	0.469429	0.0012813	0.467611	0.0005369
284	(E) Noviercas	SO	0.113253	0.0127839	0.100262	0.0002068	0.10862	0.0045745	0.101433	0.0026123	0.252368	0.0012633	0.249494	0.0016105
128	(E) Almonacid de la Cuba	Z	0.446888	0.0125443	0.201573	0.232771	1.85705	0.0044888	0.619635	1.23293	1.25768	0.0012396	0.602372	0.654072
222	(E) Fuentes de Ebro 2	Z	0.322438	0.012492	0.291037	0.0189093	0.649087	0.0044701	0.610472	0.0341449	0.606211	0.0012344	0.594064	0.0109121
352	(E) Torrecuadrada de Molina 1	GU	0.303158	0.0124859	0.290672	2e-07	0.649192	0.0044679	0.644724	0	0.578781	0.0012338	0.577548	0
213	(E) Farlete	Z	0.217103	0.012394	0.191923	0.0127859	0.462736	0.004435	0.441689	0.0166119	0.501226	0.0012247	0.496917	0.0030843
332	(E) Tabernas 2	AL	0.0184323	0.0115849	0.0067383	0.0001093	0.0169787	0.0041455	0.0118403	0.0009928	0.011611	0.0011448	0.0102354	0.0002309
140	(E) Arauzo de Salce	BU	0.0150621	0.0108461	0.0042157	5e-07	0.0775201	0.0038811	0.0723855	0.0012534	0.383244	0.0010718	0.377007	0.0051651
273	(E) Monterde de Albarracín	TE	0.746622	0.010739	0.735883	2e-07	0.805745	0.0038428	0.801902	0	0.570989	0.0010612	0.569928	0
164	(E) Borobia	SO	0.014396	0.010583	0.0038129	2e-07	0.0469482	0.003787	0.0431612	0	0.262536	0.0010458	0.26149	0
341	(E) Torlengua 2	SO	0.0232353	0.0104956	0.0125204	0.0002195	0.0388486	0.0037557	0.032793	0.0022998	0.270699	0.0010372	0.261492	0.0081695
373	(E) Villalbilla de Gumiel	BU	0.0122627	0.0103903	0.0018686	3.9e-06	0.0945587	0.003718	0.0903067	0.0005339	0.385579	0.0010267	0.383655	0.0008969
340	(E) Torlengua 1	SO	0.0222725	0.0102522	0.0120203	3e-07	0.0358268	0.0036686	0.0312159	0.0009423	0.258627	0.0010131	0.254334	0.0032793
43	Milmarcos-Llumes	GU	2.77095	0.0101911	0.930089	1.83067	1.88341	0.0036467	0.767297	1.11246	1.27135	0.0010071	0.547016	0.723328
280	(E) Muela 2	Z	0.104704	0.0100754	0.0939802	0.0006486	0.41085	0.0036154	0.405073	0.0021608	0.505252	0.0010173	0.502976	0.0012587
8	Velilla de la Sierra	SO	0.0206967	0.0098283	0.0108666	2e-06	0.0663891	0.0035169	0.0507754	0.0120968	0.232236	0.0009712	0.188449	0.0428155
305	(E) Puebla de Valverde	TE	0.0153074	0.009613	0.0056942	4e-07	0.238971	0.0034399	0.227886	0.007645	0.527824	0.0009499	0.429812	0.0970621
358	(E) Torrijo del Campo	TE	0.126055	0.0095968	0.116459	2e-07	0.510471	0.0034341	0.507037	0	0.503693	0.0009483	0.502745	0
69	Val de Urrea	Z	0.149685	0.0094774	0.105511	0.0346965	1.11437	0.0033914	0.415554	0.695427	1.67393	0.0009365	0.494556	1.17844
145	(E) Azaila 2	TE	0.430363	0.0094253	0.300479	0.120458	0.665988	0.0033727	0.554812	0.107803	0.553691	0.0009314	0.520844	0.0319158
1	Fariza	ZA	0.009345	0.0093389	6.1e-06	2e-07	0.0044007	0.0033418	0.0010567	2.1e-06	0.0084812	0.0009228	0.0075008	5.76e-05
339	(E) Tolbaños	AV	0.0090024	0.0089943	8.1e-06	2e-07	0.0035303	0.0032185	0.0003117	0	0.0222109	0.0008888	0.0210908	0.0002314
259	(E) Maranchón	GU	0.110082	0.0089865	0.0990881	0.0020072	0.514201	0.0032157	0.2505	0.260485	0.70093	0.000888	0.411694	0.288348
368	(E) Valleruela de Sepúlveda	SG	0.0325659	0.0089826	0.0235833	2e-07	0.0439353	0.0032143	0.0407189	2.1e-06	0.199823	0.0008876	0.198891	4.41e-05
197	(E) Coruña del Conde 1	BU	0.0165258	0.0088658	0.0075604	9.97e-05	0.0566324	0.0031725	0.0509878	0.002472	0.325699	0.0008761	0.3188	0.0060236
180	(E) Castejón de Monegros 2	HU	0.037716	0.0088503	0.0282266	0.0006393	0.255534	0.003167	0.242435	0.0099319	0.389421	0.0008746	0.385225	0.0033212
16	Ablitas	NA	0.0097941	0.0088271	0.000967	2e-07	0.0395357	0.0031587	0.0335242	0.0028528	0.290811	0.0008723	0.220974	0.0689638
160	(E) Belchite 2	Z	0.107657	0.0087768	0.0964708	0.0024094	0.496779	0.0031407	0.483579	0.010059	0.502004	0.0008673	0.498161	0.0029752
89	Moya	CU	0.0200637	0.0085391	0.0112427	0.0002821	0.0914154	0.0030556	0.0695348	0.018825	0.513318	0.0008438	0.315712	0.196762
110	(E) Albillos	BU	0.00851	0.008453	5.7e-05	2e-07	0.0065412	0.0030248	0.0034754	4.1e-05	0.133165	0.0008353	0.13224	8.96e-05
4	Tábara	ZA	0.0084658	0.0084429	2.29e-05	2e-07	0.0040426	0.0030212	0.0010211	3e-07	0.008207	0.0008343	0.0072657	0.000107
268	(E) Moneva	Z	1.73719	0.0083988	0.331979	1.39681	5.33708	0.0030054	0.587754	4.74632	3.19533	0.0008299	0.506495	2.688
79	Vinaceite	TE	0.287137	0.0081043	0.180809	0.0982241	1.11881	0.0029	0.499992	0.615912	0.733668	0.0008009	0.47958	0.253288
313	(E) Rubielos de la Cérida	TE	7.35305	0.0078662	0.645247	6.69994	10.928	0.0028148	0.723478	10.2017	4.58582	0.0007773	0.498943	4.0861
346	(E) Torralba de los Frailes	Z	0.599187	0.0078358	0.591352	2e-07	0.613557	0.0028039	0.610753	0	0.470319	0.0007743	0.469545	0
119	(E) Alfajarín 2	Z	0.56617	0.0074172	0.510528	0.0482249	0.533021	0.0026541	0.468487	0.0618801	0.43653	0.0007329	0.411799	0.023998
286	(E) Ojos Negros 1	TE	5.52445	0.0072876	0.662932	4.85423	5.95215	0.0026078	0.698815	5.25073	2.16602	0.0007201	0.475173	1.69013
216	(E) Frías de Albarracín 1	TE	0.0806251	0.0072654	0.066348	0.0070119	0.64082	0.0025998	0.395584	0.242636	0.566451	0.0007179	0.425345	0.140388
104	(E) Alacón 1	TE	0.170844	0.0072	0.163644	2e-07	0.468461	0.0025764	0.465884	0	0.454938	0.0007115	0.454226	0
303	(E) Pobo	TE	0.695873	0.0071244	0.450199	0.238549	0.922883	0.0025494	0.639657	0.280676	0.528765	0.000704	0.4689	0.0591612
200	(E) Cubel	Z	0.700081	0.0070504	0.692684	0.000347	0.62702	0.0025229	0.609183	0.0153142	0.456822	0.0006967	0.449805	0.0063207
158	(E) Belbimbre	BU	0.0110415	0.007017	0.0039444	8.03e-05	0.0194697	0.0025109	0.0128582	0.0041005	0.231752	0.0006934	0.148939	0.0821197
381	(E) Villarroya del Campo 2	Z	0.05147	0.0069344	0.0437805	0.0007553	0.217837	0.0024814	0.21437	0.000986	0.370568	0.0006852	0.369397	0.0004861
320	(E) Sariñena 1	HU	0.0294052	0.006774	0.0226312	2e-07	0.0978238	0.002424	0.0952524	0.0001473	0.282331	0.0006694	0.281395	0.0002665
380	(E) Villarroya del Campo 1	Z	0.094935	0.0066458	0.0686055	0.0196838	0.283677	0.0023781	0.24095	0.0403491	0.38767	0.0006567	0.371695	0.0153175
202	(E) Cuerlas 2	Z	0.482173	0.0065676	0.470369	0.0052367	0.562854	0.0023501	0.558512	0.0019911	0.431584	0.000649	0.43076	0.000175
149	(E) Bahabón de Esgueva	BU	0.0091458	0.0064623	0.0026261	5.76e-05	0.0542472	0.0023125	0.0482786	0.0036562	0.29625	0.0006386	0.277608	0.0180044
328	(E) Sepúlveda	SG	0.1155	0.0059962	0.103836	0.0056681	0.086568	0.0021457	0.0676626	0.0167596	0.223326	0.0005925	0.198637	0.024097
162	(E) Berrueco	Z	0.287039	0.0059877	0.252387	0.0286645	0.487316	0.0021426	0.461004	0.02417	0.405107	0.0005917	0.399452	0.005063
377	(E) Villar de los Navarros	Z	0.0906919	0.0059463	0.0847455	3e-07	0.350322	0.0021278	0.348194	0	0.397593	0.0005876	0.397005	0
111	(E) Alcaine 1	TE	0.0903275	0.0058903	0.0671606	0.0172767	0.599873	0.0021078	0.345242	0.252523	0.529313	0.0005821	0.394347	0.134384
279	(E) Muela 1	Z	0.378415	0.0058439	0.179783	0.192788	1.54552	0.002097	0.403534	1.13989	1.57499	0.00059	0.403699	1.1707
220	(E) Fuendetodos	Z	0.203067	0.0058304	0.0953841	0.101853	0.775944	0.0020863	0.370216	0.403641	0.525913	0.0005761	0.399343	0.125993
170	(E) Calamocha 2	TE	0.245207	0.0057478	0.239459	2e-07	0.504038	0.0020568	0.501981	0	0.409517	0.000568	0.408949	0
322	(E) Sástago 1	Z	0.0607865	0.0057364	0.0550501	2e-07	0.260379	0.0020527	0.258326	0	0.337258	0.0005669	0.336691	0
224	(E) Garaballa	CU	0.0064684	0.0057229	0.0007455	2e-07	0.0277006	0.0020479	0.0256527	0	0.22059	0.0005655	0.218386	0.0016387
245	(E) Lécera 1	Z	1.59048	0.00567	0.272471	1.31233	2.47457	0.0020289	0.473161	1.99938	1.00127	0.0005603	0.414263	0.586449
34	Conquezuela	SO	0.133924	0.0054935	0.124835	0.003596	0.198992	0.0019658	0.18788	0.009147	0.315491	0.0005429	0.309166	0.0057818
231	(E) Hinojosa del Campo	SO	0.135263	0.0054782	0.129784	2e-07	0.080515	0.0019603	0.0785547	0	0.164475	0.0005413	0.163934	0
105	(E) Alacón 2	TE	0.527264	0.0054742	0.249655	0.272135	1.05704	0.0019589	0.469319	0.585765	0.609573	0.0005409	0.408041	0.200992
114	(E) Alcubierre	HU	0.0130265	0.0054599	0.0070438	0.0005228	0.120742	0.0019538	0.106603	0.0121848	0.275792	0.0005395	0.266919	0.0083331
91	Sierra de Javalambre	TE	0.0104609	0.0054255	0.0049569	7.86e-05	0.169348	0.0019414	0.147824	0.0195825	0.392516	0.0005361	0.312872	0.0791079
165	(E) Burbáguena	TE	0.130517	0.0053218	0.0656909	0.059504	0.83371	0.0019043	0.293979	0.537827	0.497484	0.0005259	0.352858	0.1441
256	(E) Magallón	Z	0.0208167	0.0051824	0.0156341	3e-07	0.0910512	0.0018545	0.0796001	0.0095967	0.407485	0.0005121	0.277087	0.129886
321	(E) Sariñena 2	HU	0.0227015	0.0051755	0.0150631	0.0024631	0.195796	0.001852	0.137847	0.0560965	0.31586	0.0005114	0.276129	0.0392195
250	(E) Loscos 1	TE	0.0999339	0.005136	0.0932835	0.0015145	0.350737	0.0018379	0.346501	0.0023983	0.374657	0.0005075	0.373613	0.0005361
362	(E) Turrillas	AL	0.0087874	0.0051242	0.0036632	2e-07	0.0130921	0.0018336	0.0109914	0.0002671	0.0087516	0.0005064	0.007952	0.0002932
71	Cuarte de Huerva	Z	0.397092	0.0050527	0.194204	0.197836	1.50672	0.0018081	0.393826	1.11109	1.75017	0.0004993	0.379476	1.3702
228	(E) Gumiel de Izán 1	BU	0.0080023	0.0050517	0.0028012	0.0001495	0.211734	0.0018077	0.107741	0.102186	0.556375	0.0004992	0.297955	0.257921
191	(E) Cedrillas	TE	0.215503	0.0049449	0.210558	2e-07	0.461886	0.0017695	0.460117	0	0.379849	0.0004886	0.37936	0
361	(E) Tudela	NA	0.0054179	0.0049314	0.0004865	2e-07	0.0187221	0.0017646	0.0169575	0	0.14296	0.0004873	0.142473	0
122	(E) Allepuz 1	TE	0.280819	0.0049025	0.255037	0.0208799	0.502353	0.0017543	0.47983	0.0207688	0.385738	0.0004845	0.381188	0.0040654
272	(E) Monteagudo de las Vicarías	SO	0.0052388	0.0049006	0.0003383	2e-07	0.0231604	0.0017536	0.02132	8.68e-05	0.196785	0.0004843	0.195835	0.0004657
307	(E) Quinto 1	Z	0.150006	0.0048766	0.145129	2e-07	0.361617	0.001745	0.359872	0	0.367547	0.0004819	0.367065	0
208	(E) Ejulve	TE	0.0100685	0.0048125	0.0048521	0.0004041	0.218748	0.0017221	0.164474	0.0525518	0.346825	0.0004756	0.310335	0.0360148
225	(E) Gargallo	TE	0.0133734	0.0047944	0.008511	6.82e-05	0.211097	0.0017156	0.206311	0.0030709	0.328785	0.0004738	0.326848	0.0014636
70	Longares-Mezalocha	Z	0.138935	0.0047802	0.0630912	0.0710641	0.535143	0.0017105	0.290118	0.243314	0.432802	0.0004724	0.350817	0.0815128
276	(E) Muel 1	Z	0.0524252	0.0047707	0.0458367	0.001818	0.275492	0.0017071	0.264595	0.0091891	0.348674	0.0004714	0.34426	0.0039427
195	(E) Ciruelos de Cervera	BU	0.0051264	0.0047688	0.0003576	2e-07	0.051422	0.0017065	0.0497139	1.6e-06	0.25007	0.0004712	0.249485	0.0001144
101	(E) Ababuj	TE	0.12471	0.0047451	0.119858	0.0001071	0.39163	0.001698	0.389886	4.61e-05	0.361277	0.0004689	0.360805	3.9e-06
295	(E) Pedrola 3	Z	0.0335551	0.0047404	0.0231858	0.0056291	0.108935	0.0016963	0.0872528	0.0199861	0.394732	0.0004684	0.271698	0.122566
392	(E) Zaragoza 4	Z	0.041615	0.0046033	0.0370117	2e-07	0.162412	0.0016472	0.160719	4.6e-05	0.297956	0.0004549	0.297084	0.0004172
253	(E) Lucainena de las Torres	AL	0.0250648	0.0045856	0.0190184	0.001461	0.0158704	0.0016409	0.0127503	0.0014792	0.0083396	0.0004531	0.0074865	0.0004
229	(E) Gumiel de Izán 2	BU	0.0051187	0.0045383	0.0005804	2e-07	0.0568892	0.001624	0.0515121	0.0037531	0.298945	0.0004485	0.251029	0.0474685
383	(E) Villavellid	VA	0.0045226	0.0045226	0	2e-07	0.0020253	0.0016184	0.000407	0	0.0137984	0.0004469	0.013225	0.0001265
386	(E) Yesa	V	0.0045817	0.0043633	0.0002184	2e-07	0.0071971	0.0015613	0.005634	1.8e-06	0.139954	0.0004312	0.139517	5.3e-06
393	(E) Zaragoza 5	Z	0.0597071	0.0042874	0.0418284	0.0135915	0.189994	0.0015342	0.156592	0.0318679	0.301745	0.0004237	0.287244	0.0140782
198	(E) Coruña del Conde 2	BU	0.0120413	0.0042829	0.0077519	6.7e-06	0.0447068	0.0015326	0.0403351	0.0028391	0.234342	0.0004232	0.228001	0.0059182
331	(E) Tabernas 1	AL	0.0105706	0.004273	0.0062976	2e-07	0.0094541	0.001529	0.0079201	5e-06	0.006957	0.0004223	0.0065252	9.6e-06
384	(E) Villaverde del Monte	BU	0.0044524	0.0042372	0.0002153	2e-07	0.0071016	0.0015162	0.0055845	8e-07	0.108764	0.0004187	0.108342	3.2e-06
64	Allepuz	TE	0.494367	0.0041447	0.270365	0.219857	0.649935	0.0014831	0.457873	0.190579	0.390063	0.0004096	0.353168	0.0364857
38	Hortezuela de Océn	GU	0.0186836	0.0041447	0.0145389	2e-07	0.0981924	0.0014831	0.0967093	0	0.241227	0.0004096	0.240817	0
141	(E) Argente	TE	0.404337	0.0040848	0.400252	2e-07	0.50154	0.0014617	0.500078	0	0.357016	0.0004036	0.356612	0
187	(E) Castrojeriz 2	BU	0.0090001	0.0039645	0.0049386	9.71e-05	0.0102176	0.0014187	0.008715	8.39e-05	0.0940589	0.0003918	0.0930038	0.0006633
99	Karst de Sorbas	AL	0.0043157	0.0039455	0.0003701	2e-07	0.0062337	0.0014119	0.0048219	0	0.0062276	0.0003899	0.0058377	0
302	(E) Plasencia de Jalón	Z	0.0431737	0.0038965	0.0319095	0.0073679	0.256235	0.0013943	0.166157	0.0886835	0.438349	0.000385	0.289228	0.148736
218	(E) Frías de Albarracín 3	TE	0.0503274	0.0038751	0.0461764	0.000276	0.288772	0.0013867	0.283758	0.0036277	0.31092	0.0003829	0.309141	0.0013953
291	(E) Palomar de Arroyos 1	TE	0.105889	0.0038452	0.0918842	0.0101599	0.481291	0.001376	0.344396	0.135519	0.373665	0.00038	0.323875	0.0494097
282	(E) Nafría de Ucero	SO	0.0041312	0.003835	0.0002962	2e-07	0.0168355	0.0013723	0.0154523	1.08e-05	0.168883	0.000379	0.168444	5.97e-05
289	(E) Oliete 2	TE	0.196418	0.0038163	0.108699	0.0839022	0.483077	0.0013656	0.326459	0.155253	0.370108	0.0003771	0.328201	0.0415302
382	(E) Villasabariego	LE	0.0058686	0.0038121	0.0020565	2e-07	0.0045871	0.0013641	0.003223	0	0.0079022	0.0003767	0.0075013	2.43e-05
285	(E) Obón	TE	0.0556752	0.0038028	0.0518725	2e-07	0.289843	0.0013608	0.288482	0	0.320789	0.0003758	0.320413	0
227	(E) Gradefes 2	LE	0.008528	0.0036851	0.0048429	2e-07	0.0051635	0.0013187	0.0038318	1.29e-05	0.0084324	0.0003642	0.0077927	0.0002756
205	(E) Ejea de los Caballeros 1	Z	0.0045903	0.0036759	0.0009143	3e-07	0.0105648	0.0013154	0.0090933	0.0001561	0.124525	0.0003632	0.123791	0.0003708
310	(E) Robres 1	HU	0.0115482	0.0036278	0.0067561	0.0011645	0.080802	0.0012982	0.0732114	0.0062924	0.211491	0.0003585	0.208456	0.0026773
83	Molinos	TE	0.0121639	0.0036006	0.007112	0.0014514	0.145664	0.0012884	0.0869024	0.0574734	0.296943	0.0003558	0.241536	0.0550514
375	(E) Villanueva de Huerva	Z	0.0551859	0.0035973	0.0515886	2e-07	0.2478	0.0012872	0.246513	0	0.30343	0.0003555	0.303074	0
317	(E) San Mateo de Gállego 1	Z	0.0065958	0.0035931	0.0029989	3.9e-06	0.0878957	0.0012858	0.0856798	0.0009301	0.218386	0.0003551	0.217225	0.0008058
242	(E) Langa de Duero 1	SO	0.004426	0.0035308	0.0008822	1.31e-05	0.0374953	0.0012635	0.0340689	0.0021629	0.201012	0.0003489	0.196145	0.0045178
329	(E) Setiles 1	GU	0.267841	0.0034934	0.264347	2e-07	0.40227	0.0012501	0.40102	0	0.316663	0.0003452	0.316318	0
90	Ademuz	V	0.0147398	0.0034537	0.0109565	0.0003297	0.123661	0.0012359	0.0459819	0.076443	0.588703	0.0003413	0.201534	0.386828
351	(E) Torrecilla de la Orden	VA	0.003557	0.0034505	0.0001065	2e-07	0.0066853	0.0012347	0.0054414	9.1e-06	0.0126843	0.000341	0.0123044	3.89e-05
174	(E) Camarillas	TE	0.728469	0.0034095	0.346552	0.378508	0.738622	0.00122	0.4549	0.282502	0.378483	0.0003369	0.326347	0.0517998
315	(E) Saldón	TE	0.0071691	0.0033567	0.0038101	2.4e-06	0.135349	0.0012012	0.133963	0.0001847	0.251794	0.0003317	0.25132	0.0001427
173	(E) Calmarza	Z	0.0619119	0.0033456	0.0585663	2e-07	0.257267	0.0011972	0.253513	0.0025569	0.293166	0.0003306	0.281582	0.0112526
139	(E) Aras de los Olmos	V	0.0033638	0.0033005	6.33e-05	2e-07	0.0106761	0.001181	0.0094497	4.53e-05	0.144246	0.0003261	0.143785	0.0001346
281	(E) Muniesa	TE	0.153484	0.0032721	0.150211	2e-07	0.34178	0.0011725	0.340608	0	0.314538	0.0003299	0.314208	0
125	(E) Almazul	SO	0.0035612	0.0032509	0.0003086	1.9e-06	0.0249779	0.0011633	0.0196393	0.0041752	0.136356	0.0003213	0.131465	0.0045701
226	(E) Gradefes 1	LE	0.0078442	0.0031522	0.004692	2e-07	0.0047942	0.001128	0.0036662	0	0.0073971	0.0003115	0.0070856	0
185	(E) Castro de Fuentidueña	SG	0.0211563	0.0029841	0.0180844	8.8e-05	0.0396677	0.0010678	0.0356469	0.002953	0.15149	0.0002949	0.136136	0.0150584
27	Atauta	SO	0.0501017	0.0029066	0.0426012	0.0045941	0.151414	0.0010401	0.106642	0.0437316	0.267716	0.0002872	0.211972	0.0554572
199	(E) Crivillén	TE	0.0189542	0.0028697	0.0145614	0.0015234	0.149851	0.0010269	0.139052	0.009772	0.24913	0.0002836	0.24523	0.0036162
206	(E) Ejea de los Caballeros 2	Z	0.0037244	0.002852	0.0008724	2e-07	0.0088969	0.0010206	0.007656	0.0002203	0.122295	0.0002818	0.119274	0.002739
117	(E) Aldehuela de Liestos	Z	0.265598	0.0028257	0.262772	2e-07	0.34052	0.0010111	0.339509	0	0.277998	0.0002792	0.277719	0
241	(E) Lanaja 2	HU	0.0097479	0.0028221	0.0068798	4.62e-05	0.110306	0.0010098	0.108309	0.0009874	0.208455	0.0002789	0.207554	0.0006222
243	(E) Langa de Duero 2	SO	0.0044936	0.002769	0.00166	6.47e-05	0.0546237	0.0009909	0.045067	0.0085658	0.192678	0.0002736	0.17998	0.0124245
115	(E) Alcubilla de Avellaneda	SO	0.003486	0.0027072	0.0007759	3.1e-06	0.020757	0.0009687	0.0184923	0.0012959	0.167645	0.0002675	0.15997	0.0074076
95	Sierra del Picarcho	MU	0.0026972	0.0026972	0	2e-07	0.0009694	0.0009652	4.2e-06	0	0.002309	0.0002665	0.0020205	2.2e-05
49	Lechago	TE	0.310031	0.0026865	0.203602	0.103743	1.41366	0.0009613	0.364381	1.04832	0.576793	0.0002655	0.283017	0.293511
175	(E) Campillo de Aragón	Z	0.446456	0.0026666	0.41062	0.0331696	0.429676	0.0009542	0.379025	0.0496966	0.295243	0.0002635	0.278102	0.0168768
319	(E) Santa María de las Hoyas	SO	0.0029267	0.0026264	0.0003004	2e-07	0.0106233	0.0009398	0.009683	4e-07	0.135989	0.0002595	0.135716	1.4e-05
237	(E) Lagartos	P	0.0027778	0.0026221	0.0001557	2e-07	0.0027565	0.0009383	0.0018172	1e-06	0.0187757	0.0002591	0.0159439	0.0025727
357	(E) Torrepadre 2	BU	0.0038635	0.0026158	0.0012477	2e-07	0.0062891	0.000936	0.0051104	0.0002426	0.102039	0.0002585	0.0970393	0.0047408
318	(E) San Mateo de Gállego 2	Z	0.0175149	0.0025136	0.0149797	2.18e-05	0.138592	0.0008994	0.134756	0.0029364	0.210694	0.0002484	0.208542	0.0019036
308	(E) Quinto 2	Z	0.0522968	0.0025122	0.0497846	2e-07	0.239996	0.000899	0.239097	0	0.256113	0.0002482	0.255865	0
60	Gea de Albarracín	TE	0.580713	0.0024936	0.407224	0.170995	0.617826	0.0008923	0.414732	0.202202	0.332464	0.0002464	0.279815	0.0524024
233	(E) Huerto	HU	0.0024948	0.0024929	1.8e-06	2e-07	0.0054126	0.0008921	0.0044754	4.51e-05	0.101528	0.0002463	0.100023	0.0012588
309	(E) Rioseco de Soria	SO	0.0209205	0.0024472	0.0184722	1.2e-06	0.0357182	0.0008757	0.0340209	0.0008216	0.133579	0.0002418	0.131738	0.0015996
290	(E) Orrios	TE	0.253639	0.002414	0.251225	2e-07	0.369993	0.0008638	0.369129	0	0.272922	0.0002385	0.272683	0
35	Sigüenza	GU	0.0170487	0.0022836	0.0147652	2e-07	0.0786478	0.0008171	0.0778307	0	0.182016	0.0002257	0.181791	0
133	(E) Amusco	P	0.0022236	0.0022236	0	2e-07	0.001187	0.0007957	0.0003914	0	0.0389256	0.0002197	0.0386929	1.3e-05
371	(E) Villafranca del Campo 1	TE	0.330503	0.0021491	0.324737	0.003617	0.373435	0.000769	0.370938	0.0017278	0.258131	0.0002124	0.25769	0.0002286
325	(E) Sástago 4	Z	0.0649359	0.0020771	0.0628588	2e-07	0.219374	0.0007433	0.218631	0	0.227181	0.0002053	0.226976	0
257	(E) Manzanal del Barco	ZA	0.0020891	0.0020559	3.32e-05	2e-07	0.0019324	0.0007357	0.0011718	2.49e-05	0.005016	0.0002032	0.00471	0.0001028
86	Valeria	CU	0.0020064	0.0020063	0	2e-07	0.0010308	0.0007179	0.0003097	3.1e-06	0.037247	0.0001983	0.0339511	0.0030976
183	(E) Castellote	TE	0.0085597	0.0019812	0.0065785	2e-07	0.0652415	0.0007089	0.0645196	1.29e-05	0.179262	0.0001958	0.179058	8.2e-06
6	Villaseco del Pan	ZA	0.0024417	0.0019568	0.0004848	3e-07	0.0023707	0.0007002	0.0015248	0.0001457	0.006487	0.0001934	0.0051675	0.0011261
152	(E) Bañón	TE	0.603799	0.0018407	0.245926	0.356032	0.806138	0.0006587	0.330381	0.475098	0.343208	0.0001819	0.2387	0.104326
348	(E) Torre de las Arcas	TE	0.0227787	0.001829	0.0183444	0.0026055	0.242121	0.0006545	0.192752	0.0487149	0.242139	0.0001807	0.220031	0.0219277
248	(E) Leciñena 2	Z	0.0247835	0.001819	0.0210169	0.0019479	0.130059	0.0006509	0.118513	0.0108956	0.184421	0.0001797	0.176954	0.0072869
7	Almaraz de Duero	ZA	0.0023108	0.0018178	0.0004923	9e-07	0.0022382	0.0006505	0.0015115	7.62e-05	0.0076332	0.0001796	0.0052992	0.0021544
50	Cutanda	TE	0.402478	0.0017933	0.182411	0.218274	1.01065	0.0006417	0.304284	0.705722	0.410864	0.0001772	0.232299	0.178388
298	(E) Perdiguera 2	Z	0.0451619	0.001762	0.0433999	2e-07	0.145907	0.0006305	0.145276	0	0.182722	0.0001741	0.182548	0
269	(E) Monforte de Moyuela	TE	0.185943	0.0017111	0.147061	0.037171	0.321472	0.0006123	0.265973	0.0548867	0.24207	0.0001691	0.228886	0.0130149
33	Hiendelaencina	GU	0.0018197	0.001657	0.0001627	2e-07	0.0220588	0.0005929	0.0214659	0	0.122902	0.0001637	0.122739	0
236	(E) Jarque de la Val	TE	0.33783	0.0016054	0.244963	0.091261	0.628622	0.0005745	0.315074	0.312973	0.327004	0.0001586	0.224456	0.102389
304	(E) Pobo de Dueñas	GU	0.186653	0.0016054	0.185048	2e-07	0.268773	0.0005745	0.268199	0	0.213797	0.0001586	0.213638	0
135	(E) Andorra 2	TE	0.0043134	0.0016026	0.0027092	1.7e-06	0.0603392	0.0005735	0.0594296	0.0003361	0.163639	0.0001584	0.163023	0.000458
171	(E) Calatayud	Z	0.0112043	0.0015769	0.0096271	5e-07	0.0669125	0.0005643	0.0646998	0.0016485	0.177122	0.0001558	0.160971	0.0159943
277	(E) Muel 2	Z	0.0111822	0.0015572	0.009625	2e-07	0.115344	0.0005588	0.114785	0	0.186242	0.0001572	0.186084	0
334	(E) Teruel 1	TE	0.0339561	0.0015568	0.0254489	0.0069506	0.369908	0.0005571	0.172368	0.196983	0.367364	0.0001538	0.196249	0.17096
342	(E) Tornos	TE	0.0746714	0.0015514	0.0730708	4.93e-05	0.205597	0.0005551	0.204406	0.0006361	0.198245	0.0001533	0.19794	0.0001525
2	Donadillo	ZA	0.0015075	0.0015073	2e-07	2e-07	0.0006227	0.0005394	8.33e-05	0	0.0018985	0.0001489	0.0017495	0
323	(E) Sástago 2	Z	0.878617	0.0014855	0.260575	0.616556	0.87784	0.0005316	0.229218	0.64809	0.39402	0.0001468	0.191546	0.202327
103	(E) Adobes	GU	0.147082	0.0014414	0.14564	2e-07	0.24302	0.0005158	0.242504	0	0.20069	0.0001424	0.200547	0
232	(E) Hoz de la Vieja	TE	0.444666	0.0013673	0.108543	0.334756	5.31793	0.0004893	0.237189	5.08025	3.26255	0.0001351	0.204803	3.05761
244	(E) Languilla	SG	0.0519797	0.0013536	0.0501828	0.0004434	0.0824842	0.0004844	0.0768285	0.0051713	0.154133	0.0001338	0.144886	0.0091132
378	(E) Villar del Buey	ZA	0.0013452	0.001335	1.02e-05	2e-07	0.0010133	0.0004777	0.0005356	0	0.0025243	0.0001319	0.0023924	0
116	(E) Aldealengua de Santa María	SG	0.0103149	0.0013229	0.0071316	0.0018605	0.169367	0.0004734	0.0499752	0.118918	0.391485	0.0001307	0.130962	0.260393
283	(E) Nigüella	Z	0.0013477	0.0013199	2.78e-05	2e-07	0.0200825	0.0004723	0.0187637	0.0008465	0.165221	0.0001304	0.124296	0.0407946
336	(E) Teruel 3	TE	0.0553847	0.001305	0.0538897	0.0001901	0.19674	0.000467	0.195632	0.0006407	0.187594	0.000129	0.187282	0.0001833
209	(E) Embid de Ariza	Z	0.0037435	0.0013035	0.0024399	2e-07	0.0180443	0.0004665	0.01754	3.78e-05	0.111877	0.0001288	0.111533	0.0002158
23	Hoces del Riaza	SG	0.0166828	0.0012813	0.0087242	0.0066775	0.202986	0.0004585	0.036439	0.166088	0.493032	0.0001266	0.120731	0.372174
178	(E) Cascante del Río	TE	0.0069591	0.0012784	0.0049308	0.00075	0.113478	0.0004574	0.0889881	0.0240329	0.194868	0.0001263	0.158739	0.0360025
5	Vegalatrave	ZA	0.0012902	0.0012525	3.77e-05	2e-07	0.0015133	0.0004482	0.0010489	1.62e-05	0.0035731	0.0001238	0.0032998	0.0001496
147	(E) Azuara 2	Z	0.0313427	0.0012515	0.0255279	0.0045634	0.167965	0.0004478	0.159626	0.007891	0.184344	0.0001237	0.18321	0.0010101
314	(E) Sahagún	LE	0.0020323	0.0012432	0.0007891	2e-07	0.0026206	0.0004449	0.0021757	0	0.0095941	0.0001229	0.0094712	0
356	(E) Torrepadre 1	BU	0.0025869	0.001223	0.0013175	4.66e-05	0.0052089	0.0004376	0.0040799	0.0006913	0.0658288	0.0001209	0.0631681	0.0025398
345	(E) Torralba de Aragón	HU	0.0114949	0.0012172	0.0097778	0.0005001	0.0308501	0.0004356	0.0292196	0.0011949	0.109762	0.0001203	0.109247	0.0003954
214	(E) Fonfría	TE	0.120333	0.0012029	0.0929026	0.0262277	0.417697	0.0004304	0.208211	0.209056	0.317356	0.0001189	0.189343	0.127894
296	(E) Peñaranda de Duero	BU	0.0015169	0.001192	0.0003241	1.1e-06	0.0192703	0.0004265	0.0155086	0.0033351	0.11647	0.0001178	0.10867	0.0076824
274	(E) Mora de Rubielos	TE	0.0011435	0.0011422	1.3e-06	2e-07	0.0094357	0.0004087	0.009027	0	0.0960984	0.0001129	0.0959855	0
265	(E) Mezalocha	Z	0.134659	0.0011339	0.0332797	0.100246	0.528597	0.0004057	0.142616	0.385575	0.296071	0.000112	0.171215	0.124743
211	(E) Escorihuela	TE	0.0499151	0.0011068	0.0488084	2e-07	0.182737	0.000396	0.182341	0	0.173446	0.0001094	0.173336	0
169	(E) Calamocha 1	TE	0.0290717	0.0010899	0.0279818	2e-07	0.16198	0.00039	0.16159	0	0.167594	0.0001077	0.167486	0
260	(E) María de Huerva	Z	0.0243421	0.0010611	0.023281	2e-07	0.129063	0.0003797	0.128684	0	0.16285	0.0001049	0.162745	0
301	(E) Pitarque	TE	0.007063	0.0010593	0.0060037	2e-07	0.106768	0.0003791	0.10638	8.5e-06	0.153066	0.0001047	0.152957	3.6e-06
240	(E) Lanaja 1	HU	0.0025127	0.0010362	0.0014763	4e-07	0.0473429	0.0003708	0.046758	0.0002141	0.11851	0.0001024	0.11735	0.0010579
379	(E) Villarluengo	TE	0.0020927	0.001023	0.0010409	2.9e-05	0.0290346	0.0003661	0.0279103	0.0007582	0.116933	0.0001011	0.115961	0.000871
85	Zafra de Záncara	CU	0.0010161	0.0010159	2e-07	2e-07	0.0005841	0.0003635	0.0002164	4.1e-06	0.0135087	0.0001004	0.0118589	0.0015494
109	(E) Albalate del Arzobispo 3	TE	0.004286	0.000986	0.0032462	5.4e-05	0.0551204	0.0003528	0.054078	0.0006896	0.132257	9.74e-05	0.131761	0.0003984
390	(E) Zaragoza 2	Z	0.0950882	0.0009641	0.0913451	0.0027792	0.178512	0.000345	0.174751	0.0034155	0.167142	9.53e-05	0.166203	0.0008442
155	(E) Bardenas 3	NA	0.0028893	0.0009624	0.0019268	3e-07	0.0304695	0.0003444	0.0179857	0.0121394	0.249317	9.51e-05	0.0783115	0.170911
350	(E) Torre los Negros 2	TE	0.140396	0.0009107	0.139485	2e-07	0.22017	0.0003259	0.219844	0	0.16621	9e-05	0.16612	0
324	(E) Sástago 3	Z	0.0845503	0.0008876	0.025929	0.0577338	0.283403	0.0003176	0.0903317	0.192753	0.219371	8.77e-05	0.127361	0.0919218
63	Valdecebro	TE	0.0846183	0.0008584	0.047229	0.0365311	0.348778	0.0003072	0.161928	0.186542	0.285456	8.48e-05	0.152711	0.132661
120	(E) Alfambra	TE	0.0252578	0.000858	0.0243998	2e-07	0.137471	0.000307	0.137164	0	0.14758	8.48e-05	0.147495	0
369	(E) Valmadrid	Z	0.0272228	0.0008528	0.0263701	2e-07	0.122329	0.0003052	0.122024	0	0.147335	8.43e-05	0.14725	0
148	(E) Azuara 3	Z	0.116104	0.0008512	0.0421855	0.0730674	0.668379	0.0003046	0.163116	0.504958	0.451714	8.41e-05	0.15802	0.293609
134	(E) Andorra 1	TE	0.0008324	0.0008127	1.97e-05	2e-07	0.0145036	0.0002908	0.0142128	0	0.0931017	8.03e-05	0.0930214	0
217	(E) Frías de Albarracín 2	TE	0.230624	0.0008112	0.204281	0.0255313	0.26901	0.0002903	0.229182	0.0395383	0.168551	8.02e-05	0.158645	0.0098257
21	Alfés	L	0.0007706	0.0007706	0	2e-07	0.0003472	0.0002758	7.14e-05	0	0.0235101	7.62e-05	0.0234339	0
94	Moratillas	MU	0.0008028	0.0007664	3.63e-05	2e-07	0.0003375	0.0002743	6.28e-05	3e-07	0.0021481	7.57e-05	0.0020538	1.86e-05
181	(E) Castejón de Monegros 3	HU	0.0138657	0.0007645	0.0079529	0.0051484	0.147295	0.0002736	0.0609244	0.0860974	0.164771	7.55e-05	0.109404	0.0552922
230	(E) Híjar	TE	0.0092136	0.0007141	0.0084995	2e-07	0.0690835	0.0002555	0.0688279	0	0.121927	7.06e-05	0.121856	0
112	(E) Alcaine 2	TE	0.0114362	0.000701	0.0107352	2e-07	0.0998242	0.0002508	0.0995734	0	0.131541	6.93e-05	0.131471	0
203	(E) Daroca	Z	0.0270002	0.0006854	0.0232547	0.0030602	0.100774	0.0002453	0.0800037	0.0205251	0.133263	6.77e-05	0.120341	0.0128535
129	(E) Almudévar	HU	0.0006898	0.0006797	1.02e-05	2e-07	0.0042064	0.0002432	0.0037599	0.0002032	0.0597925	6.72e-05	0.0568744	0.0028509
376	(E) Villar de Gallimazo	SA	0.0006772	0.0006772	0	2e-07	0.0003387	0.0002423	9.64e-05	0	0.0035489	6.69e-05	0.0034799	2.1e-06
385	(E) Villel	TE	0.0053683	0.0006562	0.0047065	5.8e-06	0.0781362	0.0002348	0.0778465	5.49e-05	0.118538	6.48e-05	0.118457	1.56e-05
13	Dévanos	SO	0.0006597	0.0006471	1.25e-05	2e-07	0.005093	0.0002316	0.0040008	0.0008606	0.0636975	6.39e-05	0.0443228	0.0193108
367	(E) Vallejera	BU	0.0029225	0.0006457	0.0022768	2e-07	0.0039877	0.0002311	0.0037567	0	0.0376601	6.38e-05	0.0375846	1.18e-05
327	(E) Segura de los Baños	TE	0.0781974	0.000627	0.0775704	2e-07	0.155681	0.0002244	0.155457	0	0.137679	6.2e-05	0.137618	0
221	(E) Fuentes de Ebro 1	Z	0.0673779	0.0006123	0.0667655	2e-07	0.13648	0.0002191	0.136261	0	0.13195	6.05e-05	0.131889	0
215	(E) Fontioso	BU	0.0028505	0.0006038	0.0022467	2e-07	0.0142231	0.0002161	0.0136396	0.0003674	0.0902883	5.97e-05	0.0826987	0.0075299
124	(E) Alloza	TE	0.00221	0.0006011	0.0016064	2.6e-06	0.0425942	0.0002151	0.0420147	0.0003644	0.10332	5.94e-05	0.103048	0.0002127
364	(E) Used	Z	0.179575	0.0005978	0.167134	0.0118439	0.173318	0.0002139	0.169627	0.0034772	0.130298	5.91e-05	0.129919	0.0003199
306	(E) Quicena	HU	0.0005855	0.0005841	1.4e-06	2e-07	0.0009492	0.000209	0.0007401	0	0.0376979	5.77e-05	0.0376402	0
254	(E) Lupiñén-Ortilla	HU	0.0008446	0.0005745	0.0002701	2e-07	0.0022566	0.0002056	0.002051	0	0.0470997	5.68e-05	0.047043	0
270	(E) Monreal del Campo	TE	0.126782	0.0005738	0.126208	2e-07	0.16335	0.0002053	0.163144	0	0.127349	5.67e-05	0.127293	0
337	(E) Teruel 4	TE	0.0505559	0.0005578	0.048993	0.0010052	0.139414	0.0001996	0.138879	0.0003347	0.124561	5.51e-05	0.124479	2.63e-05
123	(E) Allepuz 2	TE	0.0447073	0.0005559	0.0441514	2e-07	0.13593	0.0001989	0.135731	0	0.124067	5.49e-05	0.124012	0
186	(E) Castrojeriz 1	BU	0.0068382	0.000551	0.0041647	0.0021226	0.0069693	0.0001972	0.0045357	0.0022363	0.0485007	5.45e-05	0.036924	0.0115223
167	(E) Burgos 2	BU	0.0005863	0.0005472	3.91e-05	2e-07	0.0008967	0.0001958	0.0007008	0	0.027891	5.41e-05	0.0278369	0
343	(E) Toro 1	ZA	0.0006704	0.0005376	0.0001315	1.5e-06	0.0029407	0.0001924	0.0026739	7.44e-05	0.0053672	5.31e-05	0.0051277	0.0001864
311	(E) Robres 2	HU	0.0046722	0.0005325	0.003058	0.0010819	0.0296369	0.0001905	0.0254024	0.0040439	0.0786166	5.26e-05	0.0776206	0.0009434
136	(E) Angüés	HU	0.000525	0.0005234	1.6e-06	2e-07	0.0006872	0.0001873	0.0004999	0	0.0322017	5.17e-05	0.03215	0
312	(E) Royuela	TE	0.0047775	0.0005196	0.0042549	3.2e-06	0.0703827	0.0001859	0.0701793	1.74e-05	0.104777	5.13e-05	0.104722	3e-06
360	(E) Trasobares	Z	0.0006183	0.0005	0.0001182	3e-07	0.0047451	0.0001789	0.0045279	3.83e-05	0.0634942	4.94e-05	0.0631669	0.0002779
143	(E) Ávila	AV	0.0004755	0.0004674	8.1e-06	2e-07	0.0004767	0.0001673	0.0003095	0	0.003874	4.62e-05	0.0038278	0
131	(E) Alpuente	V	0.0006873	0.0004574	0.0002299	2e-07	0.0043442	0.0001637	0.003398	0.0007824	0.0578704	4.52e-05	0.051615	0.0062102
249	(E) Leciñena 3	Z	0.0091844	0.0004336	0.0087284	2.26e-05	0.0565883	0.0001552	0.0561258	0.0003073	0.0860194	4.28e-05	0.0858973	7.93e-05
65	Alagón	Z	0.0015428	0.0004302	0.0011126	2e-07	0.0272174	0.0001539	0.0262596	0.0008038	0.0865667	4.25e-05	0.0807484	0.0057759
223	(E) Fuentes de Ebro 3	Z	0.0666639	0.0004256	0.0662382	2e-07	0.118849	0.0001523	0.118697	0	0.11098	4.21e-05	0.110938	0
258	(E) Manzanera	TE	0.0004187	0.0004152	3.5e-06	2e-07	0.0057627	0.0001486	0.0043815	0.0012326	0.0732024	4.1e-05	0.0543957	0.0187657
176	(E) Campillo de Dueñas	GU	0.102458	0.0003989	0.102059	2e-07	0.132367	0.0001427	0.132225	0	0.10537	3.94e-05	0.105331	0
353	(E) Torrecuadrada de Molina 2	GU	0.0611904	0.0003953	0.060795	2e-07	0.119828	0.0001415	0.119686	0	0.103838	3.91e-05	0.103799	0
196	(E) Corbalán	TE	0.0270339	0.0003839	0.02665	2e-07	0.103654	0.0001374	0.103516	0	0.10126	3.79e-05	0.101222	0
166	(E) Burgos 1	BU	0.0004131	0.0003756	3.75e-05	2e-07	0.0006351	0.0001344	0.0005007	0	0.0242544	3.71e-05	0.0242171	1e-07
326	(E) Segovia	SG	0.0003748	0.0003748	0	2e-07	0.0001661	0.0001341	3.2e-05	0	0.0133917	3.7e-05	0.0133546	1e-07
18	Talamantes	Z	0.0004842	0.0003679	0.0001163	2e-07	0.0042444	0.0001317	0.0036719	0.0004408	0.0598692	3.64e-05	0.0529531	0.0068799
96	Padul	GR	0.0003651	0.0003651	0	2e-07	0.0001306	0.0001306	0	0	0.0001408	3.61e-05	0.0001048	0
172	(E) Caleruega	BU	0.0009205	0.0003583	0.000492	7.04e-05	0.0733238	0.0001282	0.0258234	0.0473721	0.154738	3.54e-05	0.0779396	0.0767627
184	(E) Castrillo Matajudíos	BU	0.0011517	0.0003577	0.000794	2e-07	0.0026486	0.000128	0.0025206	0	0.0274687	3.54e-05	0.0274333	0
349	(E) Torre los Negros 1	TE	0.0976651	0.0003559	0.0973092	2e-07	0.142515	0.0001274	0.142388	0	0.104886	3.52e-05	0.104851	0
239	(E) Lagueruela 2	TE	0.0098834	0.0003526	0.0095303	7e-07	0.0804778	0.0001262	0.0802953	5.63e-05	0.0959809	3.48e-05	0.0959238	2.22e-05
151	(E) Balconchán	Z	0.0016614	0.0003508	0.0013106	2e-07	0.0436004	0.0001255	0.0434749	0	0.0797745	3.47e-05	0.0797399	0
372	(E) Villafranca del Campo 2	TE	0.0749635	0.0003449	0.0746186	2e-07	0.129449	0.0001234	0.129326	0	0.100501	3.41e-05	0.100467	0
234	(E) Ibdes 1	Z	0.119754	0.0003186	0.119436	2e-07	0.125757	0.000114	0.125643	0	0.0954166	3.15e-05	0.0953851	0
235	(E) Ibdes 2	Z	0.0240213	0.0003079	0.0222146	0.0014989	0.101345	0.0001102	0.0816147	0.0196201	0.178826	3.04e-05	0.0868404	0.0919552
335	(E) Teruel 2	TE	0.191171	0.0003007	0.0937734	0.0970972	0.503949	0.0001076	0.129931	0.37391	0.325239	2.97e-05	0.0959825	0.229226
316	(E) San Esteban de Gormaz	SO	0.0081193	0.0002993	0.00782	2e-07	0.0293734	0.0001071	0.0292663	0	0.0658127	2.96e-05	0.0657831	0
193	(E) Cidones	SO	0.0003218	0.0002953	2.65e-05	2e-07	0.0027701	0.0001057	0.0026644	0	0.0331533	2.92e-05	0.0331242	0
365	(E) Utrillas	TE	0.0781478	0.0002864	0.0770339	0.0008276	0.125999	0.0001025	0.12443	0.0014664	0.0940021	2.83e-05	0.0937177	0.0002561
338	(E) Teruel 5	TE	0.001494	0.0002815	0.0012113	1.3e-06	0.0404977	0.0001007	0.040382	1.5e-05	0.0734117	2.78e-05	0.0733807	3.2e-06
219	(E) Frías de Albarracín 4	TE	0.0350332	0.0002654	0.0347678	2e-07	0.0968946	9.5e-05	0.0967997	0	0.0854436	2.62e-05	0.0854174	0
40	Cueva de la Hoz	GU	0.0281864	0.00026	0.0098409	0.0180856	0.130367	9.31e-05	0.0313255	0.0989482	0.140187	2.57e-05	0.0635031	0.0766583
262	(E) Martí del Río 2	TE	0.15037	0.0002537	0.0887284	0.0613877	0.709432	9.08e-05	0.124738	0.584604	0.38575	2.51e-05	0.0895761	0.296149
204	(E) Deza	SO	0.0017843	0.0002465	0.0011616	0.0003763	0.0113754	8.82e-05	0.0059869	0.0053003	0.0591255	2.44e-05	0.0423764	0.0167248
333	(E) Tardienta	HU	0.0047421	0.0002302	0.0041749	0.0003372	0.0341103	8.24e-05	0.0142272	0.0198007	0.0723251	2.27e-05	0.0488513	0.0234511
251	(E) Loscos 2	TE	0.0066815	0.0002203	0.0064612	2e-07	0.0538222	7.88e-05	0.0537433	0	0.0730789	2.18e-05	0.0730571	0
113	(E) Alcalá de Gurrea	HU	0.0004834	0.0002128	0.0002704	3e-07	0.0018401	7.61e-05	0.0016168	0.0001471	0.0308357	2.1e-05	0.0299899	0.0008248
142	(E) Ariño	TE	0.0100035	0.0002106	0.0097787	1.44e-05	0.0587738	7.54e-05	0.0575593	0.0011391	0.0741155	2.08e-05	0.0727529	0.0013418
42	Alhama de Aragón	Z	0.0032045	0.0002084	0.0029953	1e-06	0.0771035	7.46e-05	0.042855	0.0341739	0.345136	2.06e-05	0.0657499	0.279365
246	(E) Lécera 2	Z	0.041046	0.0002025	0.0408435	2e-07	0.0833982	7.25e-05	0.0833257	0	0.0772205	2e-05	0.0772005	0
278	(E) Pinilla Trasmonte	BU	0.0006338	0.0001985	0.0003933	4.22e-05	0.0026101	7.12e-05	0.0020137	0.0005251	0.0212198	2e-05	0.0206722	0.0005276
156	(E) Bardenas 4	NA	0.0038855	0.0001868	0.0028052	0.0008937	0.0212957	6.68e-05	0.0101446	0.0110842	0.149392	1.85e-05	0.033048	0.116325
238	(E) Lagueruela 1	TE	0.0186401	0.000186	0.0122748	0.0061794	0.199086	6.66e-05	0.0668997	0.13212	0.161862	1.84e-05	0.0716678	0.0901754
261	(E) Martí del Río 1	TE	0.198402	0.0001786	0.0236659	0.174558	2.10716	6.39e-05	0.088287	2.01881	1.15107	1.77e-05	0.0743278	1.07673
168	(E) Burgos 3	BU	0.0002262	0.0001732	5.27e-05	5e-07	0.0007483	6.2e-05	0.0006476	3.87e-05	0.0210715	1.71e-05	0.0194613	0.0015931
182	(E) Castejón de Monegros 4	HU	0.0180266	0.0001501	0.015631	0.0022457	0.0784661	5.37e-05	0.0460994	0.032313	0.0740966	1.48e-05	0.0544749	0.0196069
252	(E) Loscos 3	TE	0.0104701	0.0001323	0.0103378	2e-07	0.0524557	4.74e-05	0.0524083	0	0.0594548	1.31e-05	0.0594418	0
344	(E) Toro 2	ZA	0.0001851	0.0001311	5.4e-05	2e-07	0.0008761	4.69e-05	0.0008267	2.5e-06	0.0023662	1.3e-05	0.0023484	4.9e-06
177	(E) Carbellino	ZA	0.0001274	0.0001223	5.1e-06	2e-07	0.0001697	4.38e-05	0.0001259	0	0.0007092	1.21e-05	0.0006971	0
121	(E) Aliaga	TE	0.0103608	0.0001221	0.0102349	3.9e-06	0.0542412	4.37e-05	0.0541836	1.38e-05	0.0563611	1.21e-05	0.0563457	3.3e-06
292	(E) Palomar de Arroyos 2	TE	0.006416	0.0001201	0.0062958	2e-07	0.0489002	4.3e-05	0.0488572	0	0.0551828	1.19e-05	0.0551709	0
210	(E) Épila	Z	0.0088819	0.0001155	0.0087664	2e-07	0.041706	4.13e-05	0.0416646	0	0.0536375	1.14e-05	0.0536261	0
3	Villanueva de Valrojo	ZA	0.0001154	0.0001148	6e-07	2e-07	0.0002008	4.11e-05	0.0001409	1.88e-05	0.0008725	1.13e-05	0.00073	0.0001313
271	(E) Montamarta	ZA	0.0001242	0.0001135	1.07e-05	2e-07	0.0002926	4.06e-05	0.0002517	2e-07	0.0012231	1.12e-05	0.0012038	8.2e-06
264	(E) Medina del Campo	VA	0.0001109	0.0001108	0	2e-07	0.0001652	3.97e-05	0.0001255	0	0.0035698	1.1e-05	0.0032253	0.0003336
212	(E) Estépar	BU	0.0001308	0.0001097	2.11e-05	2e-07	0.0007935	3.93e-05	0.0007481	6.1e-06	0.0128493	1.08e-05	0.0128242	1.43e-05
394	(E) Zaragoza 6	Z	0.0060111	9.59e-05	0.0059152	2e-07	0.0259402	3.43e-05	0.0259059	0	0.043526	9.5e-06	0.0435166	0
163	(E) Bordón	TE	0.0003233	9.31e-05	0.0002302	2e-07	0.0061746	3.33e-05	0.0061413	0	0.0327616	9.2e-06	0.0327524	0
330	(E) Setiles 2	GU	0.0270327	9.26e-05	0.0269401	2e-07	0.0568639	3.31e-05	0.0568308	0	0.0500687	9.1e-06	0.0500596	0
66	Utebo	Z	0.0075725	9.14e-05	0.0074584	2.29e-05	0.0267287	3.27e-05	0.0264733	0.0002227	0.0436366	9e-06	0.0434681	0.0001595
370	(E) Villafranca de Ebro	Z	0.0437468	8.98e-05	0.0436569	2e-07	0.0489033	3.21e-05	0.0488711	0	0.0451443	8.9e-06	0.0451355	0
255	(E) Maderuelo	SG	0.0019391	7.93e-05	0.0013667	0.0004932	0.0264089	2.84e-05	0.0100035	0.0163769	0.0619824	7.8e-06	0.0306406	0.031334
194	(E) Cimballa	Z	0.0472407	7.72e-05	0.0471635	2e-07	0.0585716	2.76e-05	0.058544	0	0.0464454	7.6e-06	0.0464378	0
207	(E) Ejea de los Caballeros 3	Z	0.0007238	7.67e-05	0.0006027	4.46e-05	0.0015864	2.74e-05	0.0014927	6.62e-05	0.0193189	7.6e-06	0.0187282	0.0005831
366	(E) Valdemaluque	SO	8.66e-05	6.55e-05	2.11e-05	3e-07	0.0020791	2.34e-05	0.0017326	0.0003231	0.0206242	6.5e-06	0.0199106	0.0007072
188	(E) Castrojeriz 3	BU	0.0010208	6.42e-05	0.0009566	2e-07	0.0014414	2.3e-05	0.0014184	0	0.0122656	6.3e-06	0.0122592	0
97	LLano de Los Brincos-La Mota	AL	6.41e-05	6.41e-05	0	2e-07	8.19e-05	2.29e-05	5.9e-05	0	0.0005569	6.3e-06	0.0005412	9.4e-06
388	(E) Zamora	ZA	6.64e-05	6.05e-05	5.9e-06	2e-07	0.0001885	2.17e-05	0.0001667	1e-07	0.0010643	6e-06	0.0010427	1.56e-05
88	Cardenete	CU	7.45e-05	5.56e-05	1.88e-05	2e-07	0.0009589	1.99e-05	0.0008861	5.29e-05	0.0149803	5.5e-06	0.0147524	0.0002224
93	Herrada del Manco	MU	5.54e-05	1.9e-05	3.63e-05	2e-07	6.15e-05	6.8e-06	5.47e-05	0	0.0003149	1.9e-06	0.000313	0

## Sheet: Prob. of connection without SS
		Scenario 1 (5 km movements, without stepping stones)	Scenario 2 (20 km movements, without stepping stones)	Scenario 3 (100 km movements, without stepping stones)
Node 1	Node 2	Probability of connection	Probability of connection	Probability of connection
50	56	0.000000	0.019832	0.456536
50	54	0.034855	0.432082	0.845499
50	64	0.000000	0.000488	0.217654
50	8	0.000000	0.000000	0.017234
50	97	0.000000	0.000000	0.000001
50	74	0.000000	0.000004	0.084273
50	58	0.000000	0.001222	0.261484
50	78	0.000000	0.000077	0.150475
50	79	0.000000	0.000164	0.174919
50	76	0.000000	0.000000	0.047877
50	3	0.000000	0.000000	0.000003
50	6	0.000000	0.000000	0.000006
50	77	0.000000	0.000009	0.098027
50	33	0.000000	0.000000	0.013150
50	34	0.000000	0.000000	0.033858
50	99	0.000000	0.000000	0.000003
50	12	0.000000	0.000000	0.040515
50	18	0.000000	0.000001	0.063788
50	63	0.000000	0.000198	0.181692
50	66	0.000000	0.000002	0.075257
50	67	0.000000	0.000003	0.079051
50	94	0.000000	0.000000	0.000624
50	93	0.000000	0.000000	0.000562
50	51	0.000000	0.000554	0.223226
50	35	0.000000	0.000000	0.030297
50	38	0.000000	0.000001	0.058915
50	40	0.000000	0.000002	0.071351
50	31	0.000000	0.000000	0.012963
50	24	0.000000	0.000000	0.001648
50	49	0.911392	0.977071	0.995372
50	48	0.000360	0.137746	0.672691
50	73	0.000000	0.000005	0.086164
50	72	0.000000	0.000249	0.190156
50	89	0.000000	0.000000	0.048529
50	86	0.000000	0.000000	0.014090
50	20	0.000000	0.000000	0.023146
50	87	0.000000	0.000000	0.031290
50	21	0.000000	0.000000	0.007753
50	36	0.000000	0.000004	0.081103
50	41	0.000000	0.000013	0.105957
50	44	0.000000	0.008484	0.385232
50	70	0.000000	0.000733	0.236064
50	14	0.000000	0.000004	0.081192
50	90	0.000000	0.000003	0.079472
50	46	0.000000	0.015434	0.434206
50	69	0.000000	0.000052	0.138814
50	15	0.000000	0.000005	0.088623
50	42	0.000000	0.000164	0.174957
50	100	0.000000	0.000000	0.000001
50	84	0.000000	0.000000	0.006751
50	37	0.000000	0.000000	0.041503
50	17	0.000000	0.000000	0.016864
50	85	0.000000	0.000000	0.009038
50	43	0.000000	0.001188	0.259975
50	39	0.000000	0.000002	0.074038
50	92	0.000000	0.000000	0.001881
50	9	0.000000	0.000000	0.022217
50	32	0.000000	0.000000	0.024479
50	22	0.000000	0.000000	0.001238
50	16	0.000000	0.000000	0.034933
50	23	0.000000	0.000000	0.002405
50	25	0.000000	0.000000	0.001629
50	65	0.000000	0.000001	0.060757
50	53	0.000120	0.104570	0.636622
50	95	0.000000	0.000000	0.000221
50	7	0.000000	0.000000	0.000009
50	75	0.000000	0.000000	0.054338
50	5	0.000000	0.000000	0.000005
50	55	0.000888	0.172609	0.703741
50	4	0.000000	0.000000	0.000005
50	96	0.000000	0.000000	0.000001
50	1	0.000000	0.000000	0.000003
50	2	0.000000	0.000000	0.000002
50	10	0.000000	0.000000	0.026879
50	68	0.000000	0.000011	0.101476
50	29	0.000000	0.000000	0.011947
50	81	0.000000	0.001470	0.271315
50	98	0.000000	0.000000	0.000003
50	28	0.000000	0.000000	0.013150
50	30	0.000000	0.000000	0.012538
50	27	0.000000	0.000000	0.005002
50	26	0.000000	0.000000	0.004074
50	11	0.000000	0.000000	0.031840
50	13	0.000000	0.000000	0.027922
50	80	0.000000	0.003264	0.318229
50	82	0.000000	0.000275	0.194085
50	19	0.000000	0.000000	0.030666
50	57	0.000002	0.036066	0.514541
50	71	0.000000	0.000023	0.117958
50	83	0.000000	0.000241	0.188956
50	45	0.000000	0.009854	0.396942
50	52	0.000000	0.004526	0.339740
50	47	0.000200	0.118867	0.653149
50	59	0.000000	0.003172	0.316424
50	61	0.000000	0.000956	0.248942
50	60	0.000000	0.000424	0.211534
50	62	0.000000	0.001964	0.287506
50	91	0.000000	0.000009	0.097350
50	88	0.000000	0.000000	0.024806
56	54	0.000003	0.041926	0.530270
56	64	0.000000	0.000210	0.183898
56	8	0.000000	0.000000	0.014380
56	97	0.000000	0.000000	0.000003
56	74	0.000000	0.000000	0.031803
56	58	0.003244	0.238656	0.750852
56	78	0.000000	0.000001	0.057315
56	79	0.000000	0.000001	0.066448
56	76	0.000000	0.000000	0.018644
56	3	0.000000	0.000000	0.000004
56	6	0.000000	0.000000	0.000010
56	77	0.000000	0.000000	0.037331
56	33	0.000000	0.000000	0.021182
56	34	0.000000	0.000000	0.045399
56	99	0.000000	0.000000	0.000008
56	12	0.000000	0.000000	0.029500
56	18	0.000000	0.000000	0.035183
56	63	0.000000	0.001716	0.279828
56	66	0.000000	0.000000	0.030743
56	67	0.000000	0.000000	0.031734
56	94	0.000000	0.000000	0.001324
56	93	0.000000	0.000000	0.001158
56	51	0.000000	0.014534	0.429018
56	35	0.000000	0.000000	0.043898
56	38	0.000000	0.000008	0.096657
56	40	0.000000	0.000019	0.113718
56	31	0.000000	0.000000	0.016526
56	24	0.000000	0.000000	0.002410
56	49	0.000000	0.014364	0.428013
56	48	0.000000	0.001313	0.265236
56	73	0.000000	0.000000	0.032204
56	72	0.000000	0.000002	0.071921
56	89	0.000000	0.000018	0.112348
56	86	0.000000	0.000000	0.040283
56	20	0.000000	0.000000	0.008842
56	87	0.000000	0.000005	0.085561
56	21	0.000000	0.000000	0.003124
56	36	0.000000	0.000018	0.113046
56	41	0.000000	0.000086	0.153857
56	44	0.000000	0.013874	0.425053
56	70	0.000000	0.000009	0.098057
56	14	0.000000	0.000001	0.058457
56	90	0.000000	0.000179	0.178019
56	46	0.000000	0.000701	0.233976
56	69	0.000000	0.000001	0.059425
56	15	0.000000	0.000002	0.070478
56	42	0.000000	0.000064	0.145099
56	100	0.000000	0.000000	0.000003
56	84	0.000000	0.000000	0.018711
56	37	0.000000	0.000001	0.068244
56	17	0.000000	0.000000	0.008107
56	85	0.000000	0.000000	0.025886
56	43	0.000000	0.000844	0.242796
56	39	0.000000	0.000037	0.130092
56	92	0.000000	0.000000	0.004493
56	9	0.000000	0.000000	0.017807
56	32	0.000000	0.000000	0.030220
56	22	0.000000	0.000000	0.001701
56	16	0.000000	0.000000	0.018328
56	23	0.000000	0.000000	0.003204
56	25	0.000000	0.000000	0.002484
56	65	0.000000	0.000000	0.025810
56	53	0.015913	0.355172	0.812995
56	95	0.000000	0.000000	0.000511
56	7	0.000000	0.000000	0.000014
56	75	0.000000	0.000000	0.021015
56	5	0.000000	0.000000	0.000007
56	55	0.000018	0.065362	0.579515
56	4	0.000000	0.000000	0.000008
56	96	0.000000	0.000000	0.000002
56	1	0.000000	0.000000	0.000005
56	2	0.000000	0.000000	0.000003
56	10	0.000000	0.000000	0.020700
56	68	0.000000	0.000000	0.047363
56	29	0.000000	0.000000	0.012458
56	81	0.000000	0.000012	0.103557
56	98	0.000000	0.000000	0.000008
56	28	0.000000	0.000000	0.012552
56	30	0.000000	0.000000	0.013601
56	27	0.000000	0.000000	0.006272
56	26	0.000000	0.000000	0.005392
56	11	0.000000	0.000000	0.023224
56	13	0.000000	0.000000	0.017880
56	80	0.000000	0.000024	0.119146
56	82	0.000000	0.000003	0.076743
56	19	0.000000	0.000000	0.011902
56	57	0.000447	0.145392	0.679999
56	71	0.000000	0.000000	0.047414
56	83	0.000000	0.000016	0.109318
56	45	0.000000	0.006175	0.361517
56	52	0.001967	0.210598	0.732303
56	47	0.000000	0.003138	0.315742
56	59	0.039493	0.445789	0.850797
56	61	0.000000	0.015936	0.436996
56	60	0.000000	0.022603	0.468633
56	62	0.000000	0.010228	0.399903
56	91	0.000000	0.000175	0.177198
56	88	0.000000	0.000001	0.064099
54	64	0.000000	0.001707	0.279544
54	8	0.000000	0.000000	0.012316
54	97	0.000000	0.000000	0.000002
54	74	0.000000	0.000002	0.070105
54	58	0.000000	0.002714	0.306708
54	78	0.000000	0.000033	0.126988
54	79	0.000000	0.000068	0.146904
54	76	0.000000	0.000000	0.041656
54	3	0.000000	0.000000	0.000002
54	6	0.000000	0.000000	0.000005
54	77	0.000000	0.000004	0.082790
54	33	0.000000	0.000000	0.011014
54	34	0.000000	0.000000	0.026962
54	99	0.000000	0.000000	0.000004
54	12	0.000000	0.000000	0.028521
54	18	0.000000	0.000000	0.044314
54	63	0.000000	0.001034	0.252893
54	66	0.000000	0.000001	0.055165
54	67	0.000000	0.000001	0.058536
54	94	0.000000	0.000000	0.000866
54	93	0.000000	0.000000	0.000782
54	51	0.000000	0.000386	0.207692
54	35	0.000000	0.000000	0.024659
54	38	0.000000	0.000000	0.050235
54	40	0.000000	0.000001	0.060399
54	31	0.000000	0.000000	0.010118
54	24	0.000000	0.000000	0.001328
54	49	0.000673	0.161053	0.694055
54	48	0.000024	0.070260	0.587952
54	73	0.000000	0.000002	0.069797
54	72	0.000000	0.000065	0.145278
54	89	0.000000	0.000001	0.066058
54	86	0.000000	0.000000	0.017244
54	20	0.000000	0.000000	0.019672
54	87	0.000000	0.000000	0.040036
54	21	0.000000	0.000000	0.006970
54	36	0.000000	0.000001	0.065964
54	41	0.000000	0.000005	0.087653
54	44	0.000000	0.002891	0.310612
54	70	0.000000	0.000142	0.169996
54	14	0.000000	0.000001	0.057261
54	90	0.000000	0.000015	0.108514
54	46	0.000000	0.002544	0.302772
54	69	0.000000	0.000010	0.099279
54	15	0.000000	0.000001	0.063441
54	42	0.000000	0.000033	0.127336
54	100	0.000000	0.000000	0.000002
54	84	0.000000	0.000000	0.007403
54	37	0.000000	0.000000	0.035071
54	17	0.000000	0.000000	0.011852
54	85	0.000000	0.000000	0.010435
54	43	0.000000	0.000272	0.193662
54	39	0.000000	0.000001	0.064862
54	92	0.000000	0.000000	0.002572
54	9	0.000000	0.000000	0.015796
54	32	0.000000	0.000000	0.019009
54	22	0.000000	0.000000	0.000979
54	16	0.000000	0.000000	0.024325
54	23	0.000000	0.000000	0.001888
54	25	0.000000	0.000000	0.001331
54	65	0.000000	0.000000	0.043762
54	53	0.000123	0.105248	0.637445
54	95	0.000000	0.000000	0.000305
54	7	0.000000	0.000000	0.000007
54	75	0.000000	0.000000	0.046897
54	5	0.000000	0.000000	0.000004
54	55	0.291219	0.734607	0.940180
54	4	0.000000	0.000000	0.000004
54	96	0.000000	0.000000	0.000001
54	1	0.000000	0.000000	0.000003
54	2	0.000000	0.000000	0.000001
54	10	0.000000	0.000000	0.019015
54	68	0.000000	0.000002	0.071311
54	29	0.000000	0.000000	0.008872
54	81	0.000000	0.000632	0.229151
54	98	0.000000	0.000000	0.000004
54	28	0.000000	0.000000	0.009607
54	30	0.000000	0.000000	0.009405
54	27	0.000000	0.000000	0.003871
54	26	0.000000	0.000000	0.003197
54	11	0.000000	0.000000	0.022401
54	13	0.000000	0.000000	0.019448
54	80	0.000000	0.001134	0.257607
54	82	0.000000	0.000149	0.171558
54	19	0.000000	0.000000	0.023102
54	57	0.000916	0.173975	0.704851
54	71	0.000000	0.000005	0.087169
54	83	0.000000	0.000430	0.212129
54	45	0.000000	0.002654	0.305332
54	52	0.000000	0.004177	0.334336
54	47	0.000000	0.019255	0.453845
54	59	0.000000	0.009240	0.391866
54	61	0.000000	0.004868	0.344730
54	60	0.000000	0.001804	0.282638
54	62	0.000000	0.010246	0.400044
54	91	0.000000	0.000045	0.135384
54	88	0.000000	0.000000	0.032771
64	8	0.000000	0.000000	0.002975
64	97	0.000000	0.000000	0.000002
64	74	0.000000	0.000001	0.056874
64	58	0.000000	0.000044	0.134299
64	78	0.000000	0.000010	0.099039
64	79	0.000000	0.000015	0.108462
64	76	0.000000	0.000000	0.044989
64	3	0.000000	0.000000	0.000001
64	6	0.000000	0.000000	0.000001
64	77	0.000000	0.000002	0.070273
64	33	0.000000	0.000000	0.002976
64	34	0.000000	0.000000	0.006766
64	99	0.000000	0.000000	0.000008
64	12	0.000000	0.000000	0.007045
64	18	0.000000	0.000000	0.012155
64	63	0.000000	0.010806	0.404328
64	66	0.000000	0.000000	0.022057
64	67	0.000000	0.000000	0.024713
64	94	0.000000	0.000000	0.001952
64	93	0.000000	0.000000	0.001847
64	51	0.000000	0.000001	0.060223
64	35	0.000000	0.000000	0.006350
64	38	0.000000	0.000000	0.013637
64	40	0.000000	0.000000	0.016166
64	31	0.000000	0.000000	0.002500
64	24	0.000000	0.000000	0.000343
64	49	0.000000	0.000151	0.172073
64	48	0.000000	0.002307	0.296898
64	73	0.000000	0.000000	0.049531
64	72	0.000000	0.000004	0.081544
64	89	0.000000	0.000005	0.088360
64	86	0.000000	0.000000	0.014177
64	20	0.000000	0.000000	0.022283
64	87	0.000000	0.000000	0.037163
64	21	0.000000	0.000000	0.010113
64	36	0.000000	0.000000	0.016784
64	41	0.000000	0.000000	0.022619
64	44	0.000000	0.000003	0.076345
64	70	0.000000	0.000001	0.060244
64	14	0.000000	0.000000	0.014177
64	90	0.000000	0.000049	0.137220
64	46	0.000000	0.000003	0.076202
64	69	0.000000	0.000000	0.033767
64	15	0.000000	0.000000	0.015305
64	42	0.000000	0.000000	0.030473
64	100	0.000000	0.000000	0.000003
64	84	0.000000	0.000000	0.003906
64	37	0.000000	0.000000	0.009581
64	17	0.000000	0.000000	0.003806
64	85	0.000000	0.000000	0.006622
64	43	0.000000	0.000000	0.046273
64	39	0.000000	0.000000	0.018219
64	92	0.000000	0.000000	0.004471
64	9	0.000000	0.000000	0.003838
64	32	0.000000	0.000000	0.004665
64	22	0.000000	0.000000	0.000247
64	16	0.000000	0.000000	0.007053
64	23	0.000000	0.000000	0.000472
64	25	0.000000	0.000000	0.000351
64	65	0.000000	0.000000	0.016142
64	53	0.000000	0.000141	0.169690
64	95	0.000000	0.000000	0.000605
64	7	0.000000	0.000000	0.000002
64	75	0.000000	0.000000	0.048011
64	5	0.000000	0.000000	0.000001
64	55	0.159743	0.632202	0.912370
64	4	0.000000	0.000000	0.000001
64	96	0.000000	0.000000	0.000001
64	1	0.000000	0.000000	0.000001
64	2	0.000000	0.000000	0.000000
64	10	0.000000	0.000000	0.004653
64	68	0.000000	0.000000	0.022024
64	29	0.000000	0.000000	0.002123
64	81	0.000000	0.000085	0.153280
64	98	0.000000	0.000000	0.000007
64	28	0.000000	0.000000	0.002296
64	30	0.000000	0.000000	0.002258
64	27	0.000000	0.000000	0.000952
64	26	0.000000	0.000000	0.000797
64	11	0.000000	0.000000	0.005543
64	13	0.000000	0.000000	0.005034
64	80	0.000000	0.000053	0.139513
64	82	0.000000	0.000080	0.151541
64	19	0.000000	0.000000	0.011699
64	57	0.000000	0.003923	0.330153
64	71	0.000000	0.000000	0.035096
64	83	0.000002	0.039043	0.522767
64	45	0.000000	0.000002	0.073299
64	52	0.000000	0.000011	0.102532
64	47	0.000000	0.000021	0.115674
64	59	0.000000	0.000251	0.190584
64	61	0.000000	0.004077	0.332706
64	60	0.000000	0.000497	0.218371
64	62	0.000000	0.021538	0.464131
64	91	0.000000	0.000646	0.230140
64	88	0.000000	0.000000	0.038025
8	97	0.000000	0.000000	0.000000
8	74	0.000000	0.000000	0.005910
8	58	0.000000	0.000000	0.011223
8	78	0.000000	0.000000	0.007183
8	79	0.000000	0.000000	0.007973
8	76	0.000000	0.000000	0.002873
8	3	0.000000	0.000000	0.000094
8	6	0.000000	0.000000	0.000143
8	77	0.000000	0.000000	0.005692
8	33	0.000000	0.000002	0.075353
8	34	0.000000	0.000094	0.156695
8	99	0.000000	0.000000	0.000000
8	12	0.000001	0.034523	0.510060
8	18	0.000000	0.000103	0.159416
8	63	0.000000	0.000000	0.003240
8	66	0.000000	0.000000	0.031098
8	67	0.000000	0.000000	0.026562
8	94	0.000000	0.000000	0.000020
8	93	0.000000	0.000000	0.000017
8	51	0.000000	0.000000	0.030507
8	35	0.000000	0.000041	0.132853
8	38	0.000000	0.000002	0.070083
8	40	0.000000	0.000002	0.072354
8	31	0.000000	0.000302	0.197644
8	24	0.000000	0.000000	0.032355
8	49	0.000000	0.000000	0.020638
8	48	0.000000	0.000000	0.013893
8	73	0.000000	0.000000	0.010207
8	72	0.000000	0.000000	0.024290
8	89	0.000000	0.000000	0.001582
8	86	0.000000	0.000000	0.001538
8	20	0.000000	0.000000	0.002107
8	87	0.000000	0.000000	0.001901
8	21	0.000000	0.000000	0.000532
8	36	0.000000	0.001117	0.256797
8	41	0.000000	0.000004	0.082635
8	44	0.000000	0.000001	0.066492
8	70	0.000000	0.000000	0.036249
8	14	0.000000	0.001663	0.278086
8	90	0.000000	0.000000	0.002334
8	46	0.000000	0.000003	0.076515
8	69	0.000000	0.000000	0.054919
8	15	0.000000	0.000583	0.225502
8	42	0.000000	0.000017	0.111149
8	100	0.000000	0.000000	0.000000
8	84	0.000000	0.000000	0.002634
8	37	0.000000	0.000003	0.078393
8	17	0.000000	0.000003	0.080015
8	85	0.000000	0.000000	0.001937
8	43	0.000000	0.000003	0.079013
8	39	0.000000	0.000001	0.056837
8	92	0.000000	0.000000	0.000083
8	9	0.108147	0.573460	0.894748
8	32	0.000000	0.000848	0.243052
8	22	0.000000	0.000000	0.032727
8	16	0.000000	0.000067	0.146072
8	23	0.000000	0.000001	0.061815
8	25	0.000000	0.000000	0.027058
8	65	0.000000	0.000000	0.041857
8	53	0.000000	0.000000	0.030472
8	95	0.000000	0.000000	0.000009
8	7	0.000000	0.000000	0.000203
8	75	0.000000	0.000000	0.003336
8	5	0.000000	0.000000	0.000132
8	55	0.000000	0.000000	0.010273
8	4	0.000000	0.000000	0.000165
8	96	0.000000	0.000000	0.000000
8	1	0.000000	0.000000	0.000072
8	2	0.000000	0.000000	0.000070
8	10	0.000697	0.162505	0.695302
8	68	0.000000	0.000002	0.073653
8	29	0.000000	0.015186	0.432801
8	81	0.000000	0.000000	0.009531
8	98	0.000000	0.000000	0.000000
8	28	0.000080	0.094522	0.623888
8	30	0.000000	0.006511	0.365364
8	27	0.000000	0.000040	0.131768
8	26	0.000000	0.000007	0.092603
8	11	0.000003	0.043045	0.533071
8	13	0.000000	0.005714	0.355944
8	80	0.000000	0.000000	0.012333
8	82	0.000000	0.000000	0.006355
8	19	0.000000	0.000000	0.013326
8	57	0.000000	0.000000	0.009297
8	71	0.000000	0.000000	0.028630
8	83	0.000000	0.000000	0.002922
8	45	0.000000	0.000000	0.051418
8	52	0.000000	0.000000	0.030735
8	47	0.000000	0.000000	0.031779
8	59	0.000000	0.000000	0.010723
8	61	0.000000	0.000000	0.005022
8	60	0.000000	0.000000	0.005654
8	62	0.000000	0.000000	0.004827
8	91	0.000000	0.000000	0.002068
8	88	0.000000	0.000000	0.001204
97	74	0.000000	0.000000	0.000000
97	58	0.000000	0.000000	0.000005
97	78	0.000000	0.000000	0.000000
97	79	0.000000	0.000000	0.000000
97	76	0.000000	0.000000	0.000000
97	3	0.000000	0.000000	0.000000
97	6	0.000000	0.000000	0.000000
97	77	0.000000	0.000000	0.000000
97	33	0.000000	0.000000	0.000001
97	34	0.000000	0.000000	0.000001
97	99	0.000000	0.000502	0.218868
97	12	0.000000	0.000000	0.000000
97	18	0.000000	0.000000	0.000000
97	63	0.000000	0.000000	0.000006
97	66	0.000000	0.000000	0.000000
97	67	0.000000	0.000000	0.000000
97	94	0.000000	0.000000	0.001135
97	93	0.000000	0.000000	0.001027
97	51	0.000000	0.000000	0.000003
97	35	0.000000	0.000000	0.000001
97	38	0.000000	0.000000	0.000002
97	40	0.000000	0.000000	0.000002
97	31	0.000000	0.000000	0.000000
97	24	0.000000	0.000000	0.000000
97	49	0.000000	0.000000	0.000001
97	48	0.000000	0.000000	0.000001
97	73	0.000000	0.000000	0.000000
97	72	0.000000	0.000000	0.000000
97	89	0.000000	0.000000	0.000032
97	86	0.000000	0.000000	0.000076
97	20	0.000000	0.000000	0.000000
97	87	0.000000	0.000000	0.000043
97	21	0.000000	0.000000	0.000000
97	36	0.000000	0.000000	0.000001
97	41	0.000000	0.000000	0.000001
97	44	0.000000	0.000000	0.000001
97	70	0.000000	0.000000	0.000000
97	14	0.000000	0.000000	0.000000
97	90	0.000000	0.000000	0.000025
97	46	0.000000	0.000000	0.000001
97	69	0.000000	0.000000	0.000000
97	15	0.000000	0.000000	0.000000
97	42	0.000000	0.000000	0.000001
97	100	0.000000	0.012248	0.414582
97	84	0.000000	0.000000	0.000051
97	37	0.000000	0.000000	0.000002
97	17	0.000000	0.000000	0.000000
97	85	0.000000	0.000000	0.000064
97	43	0.000000	0.000000	0.000001
97	39	0.000000	0.000000	0.000003
97	92	0.000000	0.000000	0.000773
97	9	0.000000	0.000000	0.000000
97	32	0.000000	0.000000	0.000001
97	22	0.000000	0.000000	0.000000
97	16	0.000000	0.000000	0.000000
97	23	0.000000	0.000000	0.000000
97	25	0.000000	0.000000	0.000000
97	65	0.000000	0.000000	0.000000
97	53	0.000000	0.000000	0.000002
97	95	0.000000	0.000000	0.004612
97	7	0.000000	0.000000	0.000000
97	75	0.000000	0.000000	0.000000
97	5	0.000000	0.000000	0.000000
97	55	0.000000	0.000000	0.000003
97	4	0.000000	0.000000	0.000000
97	96	0.000000	0.000003	0.078817
97	1	0.000000	0.000000	0.000000
97	2	0.000000	0.000000	0.000000
97	10	0.000000	0.000000	0.000000
97	68	0.000000	0.000000	0.000000
97	29	0.000000	0.000000	0.000000
97	81	0.000000	0.000000	0.000000
97	98	0.000000	0.003341	0.319730
97	28	0.000000	0.000000	0.000000
97	30	0.000000	0.000000	0.000000
97	27	0.000000	0.000000	0.000000
97	26	0.000000	0.000000	0.000000
97	11	0.000000	0.000000	0.000000
97	13	0.000000	0.000000	0.000000
97	80	0.000000	0.000000	0.000000
97	82	0.000000	0.000000	0.000000
97	19	0.000000	0.000000	0.000000
97	57	0.000000	0.000000	0.000003
97	71	0.000000	0.000000	0.000000
97	83	0.000000	0.000000	0.000001
97	45	0.000000	0.000000	0.000001
97	52	0.000000	0.000000	0.000003
97	47	0.000000	0.000000	0.000001
97	59	0.000000	0.000000	0.000005
97	61	0.000000	0.000000	0.000005
97	60	0.000000	0.000000	0.000007
97	62	0.000000	0.000000	0.000005
97	91	0.000000	0.000000	0.000014
97	88	0.000000	0.000000	0.000055
74	58	0.000000	0.000000	0.018221
74	78	0.000402	0.141577	0.676392
74	79	0.000007	0.052109	0.553839
74	76	0.000082	0.095119	0.624673
74	3	0.000000	0.000000	0.000000
74	6	0.000000	0.000000	0.000001
74	77	0.307677	0.744773	0.942768
74	33	0.000000	0.000000	0.001495
74	34	0.000000	0.000000	0.004474
74	99	0.000000	0.000000	0.000000
74	12	0.000000	0.000000	0.015282
74	18	0.000000	0.000000	0.042205
74	63	0.000000	0.000000	0.023294
74	66	0.000000	0.000266	0.192719
74	67	0.000000	0.000682	0.232712
74	94	0.000000	0.000000	0.000095
74	93	0.000000	0.000000	0.000092
74	51	0.000000	0.000000	0.016500
74	35	0.000000	0.000000	0.003656
74	38	0.000000	0.000000	0.005697
74	40	0.000000	0.000000	0.006947
74	31	0.000000	0.000000	0.002079
74	24	0.000000	0.000000	0.000245
74	49	0.000000	0.000003	0.080016
74	48	0.000000	0.001126	0.257235
74	73	0.545129	0.859260	0.970119
74	72	0.000088	0.096973	0.627090
74	89	0.000000	0.000000	0.004916
74	86	0.000000	0.000000	0.001032
74	20	0.000000	0.004598	0.340817
74	87	0.000000	0.000000	0.002510
74	21	0.000000	0.000010	0.099642
74	36	0.000000	0.000000	0.009223
74	41	0.000000	0.000000	0.010666
74	44	0.000000	0.000000	0.034000
74	70	0.000000	0.000326	0.200692
74	14	0.000000	0.000000	0.029079
74	90	0.000000	0.000000	0.008006
74	46	0.000000	0.000002	0.074332
74	69	0.000000	0.000081	0.152040
74	15	0.000000	0.000000	0.021355
74	42	0.000000	0.000000	0.029471
74	100	0.000000	0.000000	0.000000
74	84	0.000000	0.000000	0.000458
74	37	0.000000	0.000000	0.004241
74	17	0.000000	0.000000	0.030641
74	85	0.000000	0.000000	0.000619
74	43	0.000000	0.000000	0.033534
74	39	0.000000	0.000000	0.006570
74	92	0.000000	0.000000	0.000218
74	9	0.000000	0.000000	0.007897
74	32	0.000000	0.000000	0.003826
74	22	0.000000	0.000000	0.000209
74	16	0.000000	0.000000	0.036010
74	23	0.000000	0.000000	0.000413
74	25	0.000000	0.000000	0.000226
74	65	0.000000	0.000039	0.131392
74	53	0.000000	0.000000	0.043180
74	95	0.000000	0.000000	0.000029
74	7	0.000000	0.000000	0.000001
74	75	0.001711	0.203391	0.727221
74	5	0.000000	0.000000	0.000001
74	55	0.000000	0.000007	0.093619
74	4	0.000000	0.000000	0.000001
74	96	0.000000	0.000000	0.000000
74	1	0.000000	0.000000	0.000000
74	2	0.000000	0.000000	0.000000
74	10	0.000000	0.000000	0.010016
74	68	0.000000	0.000008	0.094802
74	29	0.000000	0.000000	0.002787
74	81	0.000000	0.007235	0.373158
74	98	0.000000	0.000000	0.000000
74	28	0.000000	0.000000	0.003559
74	30	0.000000	0.000000	0.002669
74	27	0.000000	0.000000	0.000911
74	26	0.000000	0.000000	0.000681
74	11	0.000000	0.000000	0.012857
74	13	0.000000	0.000000	0.016941
74	80	0.000000	0.002678	0.305884
74	82	0.000001	0.026808	0.484899
74	19	0.000000	0.000329	0.201113
74	57	0.000000	0.000000	0.044206
74	71	0.000000	0.000797	0.240062
74	83	0.000000	0.000074	0.149140
74	45	0.000000	0.000000	0.039682
74	52	0.000000	0.000000	0.023520
74	47	0.000000	0.000004	0.084125
74	59	0.000000	0.000000	0.023259
74	61	0.000000	0.000000	0.025246
74	60	0.000000	0.000000	0.018238
74	62	0.000000	0.000000	0.033974
74	91	0.000000	0.000000	0.012092
74	88	0.000000	0.000000	0.002221
58	78	0.000000	0.000000	0.032906
58	79	0.000000	0.000000	0.038118
58	76	0.000000	0.000000	0.010793
58	3	0.000000	0.000000	0.000004
58	6	0.000000	0.000000	0.000011
58	77	0.000000	0.000000	0.021441
58	33	0.000000	0.000000	0.022613
58	34	0.000000	0.000000	0.042917
58	99	0.000000	0.000000	0.000011
58	12	0.000000	0.000000	0.021763
58	18	0.000000	0.000000	0.023430
58	63	0.000000	0.001435	0.269997
58	66	0.000000	0.000000	0.018296
58	67	0.000000	0.000000	0.018721
58	94	0.000000	0.000000	0.001845
58	93	0.000000	0.000000	0.001597
58	51	0.000000	0.012065	0.413341
58	35	0.000000	0.000000	0.043316
58	38	0.000000	0.000010	0.099289
58	40	0.000000	0.000019	0.113729
58	31	0.000000	0.000000	0.015612
58	24	0.000000	0.000000	0.002512
58	49	0.000000	0.000936	0.247877
58	48	0.000000	0.000082	0.152468
58	73	0.000000	0.000000	0.018408
58	72	0.000000	0.000000	0.041368
58	89	0.000000	0.000093	0.156349
58	86	0.000000	0.000001	0.062319
58	20	0.000000	0.000000	0.005088
58	87	0.000000	0.000038	0.130411
58	21	0.000000	0.000000	0.001836
58	36	0.000000	0.000013	0.105387
58	41	0.000000	0.000059	0.142735
58	44	0.000000	0.002568	0.303330
58	70	0.000000	0.000001	0.058368
58	14	0.000000	0.000000	0.041952
58	90	0.000000	0.000790	0.239637
58	46	0.000000	0.000072	0.148264
58	69	0.000000	0.000000	0.035982
58	15	0.000000	0.000000	0.052094
58	42	0.000000	0.000013	0.105651
58	100	0.000000	0.000000	0.000004
58	84	0.000000	0.000000	0.027677
58	37	0.000000	0.000002	0.072019
58	17	0.000000	0.000000	0.005245
58	85	0.000000	0.000000	0.039468
58	43	0.000000	0.000243	0.189330
58	39	0.000000	0.000049	0.137247
58	92	0.000000	0.000000	0.006527
58	9	0.000000	0.000000	0.013628
58	32	0.000000	0.000000	0.028049
58	22	0.000000	0.000000	0.001719
58	16	0.000000	0.000000	0.012123
58	23	0.000000	0.000000	0.003167
58	25	0.000000	0.000000	0.002647
58	65	0.000000	0.000000	0.015669
58	53	0.000001	0.027958	0.488993
58	95	0.000000	0.000000	0.000736
58	7	0.000000	0.000000	0.000016
58	75	0.000000	0.000000	0.012135
58	5	0.000000	0.000000	0.000008
58	55	0.000000	0.005731	0.356161
58	4	0.000000	0.000000	0.000008
58	96	0.000000	0.000000	0.000003
58	1	0.000000	0.000000	0.000006
58	2	0.000000	0.000000	0.000003
58	10	0.000000	0.000000	0.015584
58	68	0.000000	0.000000	0.029837
58	29	0.000000	0.000000	0.010758
58	81	0.000000	0.000001	0.059436
58	98	0.000000	0.000000	0.000012
58	28	0.000000	0.000000	0.010407
58	30	0.000000	0.000000	0.011917
58	27	0.000000	0.000000	0.005968
58	26	0.000000	0.000000	0.005283
58	11	0.000000	0.000000	0.017070
58	13	0.000000	0.000000	0.012593
58	80	0.000000	0.000001	0.068116
58	82	0.000000	0.000000	0.044484
58	19	0.000000	0.000000	0.006939
58	57	0.000000	0.017655	0.446038
58	71	0.000000	0.000000	0.027935
58	83	0.000000	0.000002	0.071109
58	45	0.000000	0.000956	0.248937
58	52	0.000504	0.149864	0.684131
58	47	0.000000	0.000252	0.190612
58	59	0.401500	0.796015	0.955398
58	61	0.000000	0.012867	0.418695
58	60	0.000010	0.055720	0.561309
58	62	0.000000	0.004563	0.340296
58	91	0.000000	0.000385	0.207545
58	88	0.000000	0.000008	0.095313
78	79	0.939763	0.984588	0.996898
78	76	0.000000	0.009983	0.397970
78	3	0.000000	0.000000	0.000001
78	6	0.000000	0.000000	0.000001
78	77	0.017968	0.366122	0.817947
78	33	0.000000	0.000000	0.002262
78	34	0.000000	0.000000	0.006649
78	99	0.000000	0.000000	0.000001
78	12	0.000000	0.000000	0.018749
78	18	0.000000	0.000000	0.047842
78	63	0.000000	0.000000	0.041953
78	66	0.000000	0.000162	0.174478
78	67	0.000000	0.000381	0.207070
78	94	0.000000	0.000000	0.000163
78	93	0.000000	0.000000	0.000155
78	51	0.000000	0.000000	0.028325
78	35	0.000000	0.000000	0.005528
78	38	0.000000	0.000000	0.009093
78	40	0.000000	0.000000	0.011095
78	31	0.000000	0.000000	0.002932
78	24	0.000000	0.000000	0.000346
78	49	0.000000	0.000054	0.139855
78	48	0.000000	0.022333	0.467508
78	73	0.000029	0.073276	0.592914
78	72	0.010850	0.322746	0.797576
78	89	0.000000	0.000000	0.008898
78	86	0.000000	0.000000	0.001879
78	20	0.000000	0.000278	0.194400
78	87	0.000000	0.000000	0.004578
78	21	0.000000	0.000001	0.062315
78	36	0.000000	0.000000	0.014084
78	41	0.000000	0.000000	0.017005
78	44	0.000000	0.000001	0.056831
78	70	0.000000	0.001425	0.269611
78	14	0.000000	0.000000	0.036834
78	90	0.000000	0.000000	0.014517
78	46	0.000000	0.000021	0.115457
78	69	0.000000	0.000175	0.177198
78	15	0.000000	0.000000	0.029170
78	42	0.000000	0.000000	0.043762
78	100	0.000000	0.000000	0.000000
78	84	0.000000	0.000000	0.000814
78	37	0.000000	0.000000	0.006666
78	17	0.000000	0.000000	0.025954
78	85	0.000000	0.000000	0.001118
78	43	0.000000	0.000000	0.052331
78	39	0.000000	0.000000	0.010698
78	92	0.000000	0.000000	0.000387
78	9	0.000000	0.000000	0.009595
78	32	0.000000	0.000000	0.005471
78	22	0.000000	0.000000	0.000285
78	16	0.000000	0.000000	0.035891
78	23	0.000000	0.000000	0.000565
78	25	0.000000	0.000000	0.000324
78	65	0.000000	0.000024	0.118868
78	53	0.000000	0.000003	0.076731
78	95	0.000000	0.000000	0.000051
78	7	0.000000	0.000000	0.000002
78	75	0.000000	0.019571	0.455327
78	5	0.000000	0.000000	0.000001
78	55	0.000000	0.000145	0.170666
78	4	0.000000	0.000000	0.000001
78	96	0.000000	0.000000	0.000000
78	1	0.000000	0.000000	0.000001
78	2	0.000000	0.000000	0.000000
78	10	0.000000	0.000000	0.012127
78	68	0.000000	0.000014	0.106492
78	29	0.000000	0.000000	0.003636
78	81	0.000386	0.140123	0.674997
78	98	0.000000	0.000000	0.000001
78	28	0.000000	0.000000	0.004515
78	30	0.000000	0.000000	0.003550
78	27	0.000000	0.000000	0.001238
78	26	0.000000	0.000000	0.000941
78	11	0.000000	0.000000	0.015410
78	13	0.000000	0.000000	0.018519
78	80	0.000003	0.042483	0.531671
78	82	0.022354	0.386667	0.826928
78	19	0.000000	0.000034	0.127645
78	57	0.000000	0.000003	0.080539
78	71	0.000000	0.000977	0.250026
78	83	0.000000	0.000735	0.236200
78	45	0.000000	0.000001	0.064459
78	52	0.000000	0.000000	0.041274
78	47	0.000000	0.000055	0.140590
78	59	0.000000	0.000000	0.042250
78	61	0.000000	0.000000	0.045961
78	60	0.000000	0.000000	0.033268
78	62	0.000000	0.000001	0.061654
78	91	0.000000	0.000000	0.021696
78	88	0.000000	0.000000	0.004039
79	76	0.000000	0.002883	0.310439
79	3	0.000000	0.000000	0.000001
79	6	0.000000	0.000000	0.000001
79	77	0.000186	0.116829	0.650894
79	33	0.000000	0.000000	0.002610
79	34	0.000000	0.000000	0.007645
79	99	0.000000	0.000000	0.000001
79	12	0.000000	0.000000	0.020804
79	18	0.000000	0.000000	0.052120
79	63	0.000000	0.000000	0.047118
79	66	0.000000	0.000183	0.178858
79	67	0.000000	0.000416	0.210725
79	94	0.000000	0.000000	0.000178
79	93	0.000000	0.000000	0.000169
79	51	0.000000	0.000000	0.033004
79	35	0.000000	0.000000	0.006372
79	38	0.000000	0.000000	0.010548
79	40	0.000000	0.000000	0.012871
79	31	0.000000	0.000000	0.003346
79	24	0.000000	0.000000	0.000395
79	49	0.000000	0.000115	0.162928
79	48	0.000004	0.045696	0.539481
79	73	0.000002	0.039310	0.523481
79	72	0.016816	0.360107	0.815242
79	89	0.000000	0.000000	0.010051
79	86	0.000000	0.000000	0.002163
79	20	0.000000	0.000086	0.153681
79	87	0.000000	0.000000	0.005239
79	21	0.000000	0.000000	0.048549
79	36	0.000000	0.000000	0.016249
79	41	0.000000	0.000000	0.019719
79	44	0.000000	0.000001	0.066147
79	70	0.000000	0.002445	0.300370
79	14	0.000000	0.000000	0.041066
79	90	0.000000	0.000000	0.016426
79	46	0.000000	0.000042	0.133413
79	69	0.000000	0.000261	0.192015
79	15	0.000000	0.000000	0.033021
79	42	0.000000	0.000000	0.050221
79	100	0.000000	0.000000	0.000000
79	84	0.000000	0.000000	0.000947
79	37	0.000000	0.000000	0.007720
79	17	0.000000	0.000000	0.026666
79	85	0.000000	0.000000	0.001295
79	43	0.000000	0.000001	0.060479
79	39	0.000000	0.000000	0.012433
79	92	0.000000	0.000000	0.000431
79	9	0.000000	0.000000	0.010644
79	32	0.000000	0.000000	0.006254
79	22	0.000000	0.000000	0.000324
79	16	0.000000	0.000000	0.038135
79	23	0.000000	0.000000	0.000642
79	25	0.000000	0.000000	0.000371
79	65	0.000000	0.000028	0.122525
79	53	0.000000	0.000006	0.089249
79	95	0.000000	0.000000	0.000056
79	7	0.000000	0.000000	0.000002
79	75	0.000000	0.005710	0.355905
79	5	0.000000	0.000000	0.000001
79	55	0.000000	0.000290	0.196045
79	4	0.000000	0.000000	0.000001
79	96	0.000000	0.000000	0.000000
79	1	0.000000	0.000000	0.000001
79	2	0.000000	0.000000	0.000001
79	10	0.000000	0.000000	0.013437
79	68	0.000000	0.000020	0.115180
79	29	0.000000	0.000000	0.004093
79	81	0.007361	0.292911	0.782253
79	98	0.000000	0.000000	0.000001
79	28	0.000000	0.000000	0.005054
79	30	0.000000	0.000000	0.004010
79	27	0.000000	0.000000	0.001405
79	26	0.000000	0.000000	0.001071
79	11	0.000000	0.000000	0.017035
79	13	0.000000	0.000000	0.020104
79	80	0.000069	0.091091	0.619292
79	82	0.026376	0.402996	0.833797
79	19	0.000000	0.000026	0.121274
79	57	0.000000	0.000007	0.092654
79	71	0.000000	0.001253	0.262769
79	83	0.000000	0.000882	0.244985
79	45	0.000000	0.000002	0.074935
79	52	0.000000	0.000000	0.048065
79	47	0.000000	0.000117	0.163557
79	59	0.000000	0.000000	0.048777
79	61	0.000000	0.000000	0.052274
79	60	0.000000	0.000000	0.038079
79	62	0.000000	0.000002	0.069771
79	91	0.000000	0.000000	0.024303
79	88	0.000000	0.000000	0.004588
76	3	0.000000	0.000000	0.000000
76	6	0.000000	0.000000	0.000000
76	77	0.000005	0.046080	0.540384
76	33	0.000000	0.000000	0.000734
76	34	0.000000	0.000000	0.002186
76	99	0.000000	0.000000	0.000000
76	12	0.000000	0.000000	0.007423
76	18	0.000000	0.000000	0.020587
76	63	0.000000	0.000000	0.016746
76	66	0.000000	0.000009	0.097023
76	67	0.000000	0.000022	0.117152
76	94	0.000000	0.000000	0.000083
76	93	0.000000	0.000000	0.000081
76	51	0.000000	0.000000	0.008833
76	35	0.000000	0.000000	0.001796
76	38	0.000000	0.000000	0.002867
76	40	0.000000	0.000000	0.003498
76	31	0.000000	0.000000	0.001006
76	24	0.000000	0.000000	0.000119
76	49	0.000000	0.000000	0.043775
76	48	0.000000	0.000080	0.151611
76	73	0.000020	0.066847	0.582126
76	72	0.000000	0.002710	0.306613
76	89	0.000000	0.000000	0.003499
76	86	0.000000	0.000000	0.000658
76	20	0.000006	0.048569	0.546101
76	87	0.000000	0.000000	0.001653
76	21	0.000000	0.000193	0.180740
76	36	0.000000	0.000000	0.004549
76	41	0.000000	0.000000	0.005366
76	44	0.000000	0.000000	0.017705
76	70	0.000000	0.000009	0.097141
76	14	0.000000	0.000000	0.014063
76	90	0.000000	0.000000	0.005614
76	46	0.000000	0.000000	0.037048
76	69	0.000000	0.000002	0.073841
76	15	0.000000	0.000000	0.010314
76	42	0.000000	0.000000	0.014428
76	100	0.000000	0.000000	0.000000
76	84	0.000000	0.000000	0.000261
76	37	0.000000	0.000000	0.002116
76	17	0.000000	0.000000	0.016392
76	85	0.000000	0.000000	0.000370
76	43	0.000000	0.000000	0.016715
76	39	0.000000	0.000000	0.003349
76	92	0.000000	0.000000	0.000171
76	9	0.000000	0.000000	0.003838
76	32	0.000000	0.000000	0.001854
76	22	0.000000	0.000000	0.000101
76	16	0.000000	0.000000	0.018022
76	23	0.000000	0.000000	0.000199
76	25	0.000000	0.000000	0.000109
76	65	0.000000	0.000001	0.066740
76	53	0.000000	0.000000	0.024366
76	95	0.000000	0.000000	0.000024
76	7	0.000000	0.000000	0.000001
76	75	0.956254	0.988879	0.997766
76	5	0.000000	0.000000	0.000000
76	55	0.000000	0.000001	0.061882
76	4	0.000000	0.000000	0.000000
76	96	0.000000	0.000000	0.000000
76	1	0.000000	0.000000	0.000000
76	2	0.000000	0.000000	0.000000
76	10	0.000000	0.000000	0.004869
76	68	0.000000	0.000000	0.046174
76	29	0.000000	0.000000	0.001347
76	81	0.000000	0.000445	0.213655
76	98	0.000000	0.000000	0.000000
76	28	0.000000	0.000000	0.001724
76	30	0.000000	0.000000	0.001288
76	27	0.000000	0.000000	0.000440
76	26	0.000000	0.000000	0.000329
76	11	0.000000	0.000000	0.006252
76	13	0.000000	0.000000	0.008327
76	80	0.000000	0.000124	0.165512
76	82	0.000000	0.003537	0.323398
76	19	0.000000	0.000035	0.128813
76	57	0.000000	0.000000	0.027441
76	71	0.000000	0.000022	0.117102
76	83	0.000000	0.000036	0.129322
76	45	0.000000	0.000000	0.020175
76	52	0.000000	0.000000	0.012988
76	47	0.000000	0.000000	0.043833
76	59	0.000000	0.000000	0.014159
76	61	0.000000	0.000000	0.016927
76	60	0.000000	0.000000	0.011815
76	62	0.000000	0.000000	0.023308
76	91	0.000000	0.000000	0.008917
76	88	0.000000	0.000000	0.001538
3	6	0.000000	0.000943	0.248231
3	77	0.000000	0.000000	0.000000
3	33	0.000000	0.000000	0.000233
3	34	0.000000	0.000000	0.000098
3	99	0.000000	0.000000	0.000000
3	12	0.000000	0.000000	0.000042
3	18	0.000000	0.000000	0.000013
3	63	0.000000	0.000000	0.000001
3	66	0.000000	0.000000	0.000003
3	67	0.000000	0.000000	0.000002
3	94	0.000000	0.000000	0.000000
3	93	0.000000	0.000000	0.000000
3	51	0.000000	0.000000	0.000011
3	35	0.000000	0.000000	0.000133
3	38	0.000000	0.000000	0.000049
3	40	0.000000	0.000000	0.000041
3	31	0.000000	0.000000	0.000268
3	24	0.000000	0.000000	0.001979
3	49	0.000000	0.000000	0.000003
3	48	0.000000	0.000000	0.000002
3	73	0.000000	0.000000	0.000001
3	72	0.000000	0.000000	0.000002
3	89	0.000000	0.000000	0.000001
3	86	0.000000	0.000000	0.000005
3	20	0.000000	0.000000	0.000000
3	87	0.000000	0.000000	0.000003
3	21	0.000000	0.000000	0.000000
3	36	0.000000	0.000000	0.000114
3	41	0.000000	0.000000	0.000033
3	44	0.000000	0.000000	0.000018
3	70	0.000000	0.000000	0.000003
3	14	0.000000	0.000000	0.000026
3	90	0.000000	0.000000	0.000001
3	46	0.000000	0.000000	0.000009
3	69	0.000000	0.000000	0.000004
3	15	0.000000	0.000000	0.000026
3	42	0.000000	0.000000	0.000016
3	100	0.000000	0.000000	0.000000
3	84	0.000000	0.000000	0.000030
3	37	0.000000	0.000000	0.000077
3	17	0.000000	0.000000	0.000009
3	85	0.000000	0.000000	0.000012
3	43	0.000000	0.000000	0.000016
3	39	0.000000	0.000000	0.000043
3	92	0.000000	0.000000	0.000000
3	9	0.000000	0.000000	0.000073
3	32	0.000000	0.000000	0.000674
3	22	0.000000	0.000000	0.002797
3	16	0.000000	0.000000	0.000013
3	23	0.000000	0.000000	0.001750
3	25	0.000000	0.000000	0.002429
3	65	0.000000	0.000000	0.000003
3	53	0.000000	0.000000	0.000007
3	95	0.000000	0.000000	0.000000
3	7	0.000000	0.000763	0.237972
3	75	0.000000	0.000000	0.000000
3	5	0.000004	0.043923	0.535226
3	55	0.000000	0.000000	0.000002
3	4	0.000219	0.121583	0.656107
3	96	0.000000	0.000000	0.000000
3	1	0.000000	0.000767	0.238188
3	2	0.000232	0.123361	0.658014
3	10	0.000000	0.000000	0.000057
3	68	0.000000	0.000000	0.000006
3	29	0.000000	0.000000	0.000218
3	81	0.000000	0.000000	0.000001
3	98	0.000000	0.000000	0.000000
3	28	0.000000	0.000000	0.000172
3	30	0.000000	0.000000	0.000215
3	27	0.000000	0.000000	0.000639
3	26	0.000000	0.000000	0.000807
3	11	0.000000	0.000000	0.000043
3	13	0.000000	0.000000	0.000031
3	80	0.000000	0.000000	0.000001
3	82	0.000000	0.000000	0.000001
3	19	0.000000	0.000000	0.000001
3	57	0.000000	0.000000	0.000002
3	71	0.000000	0.000000	0.000002
3	83	0.000000	0.000000	0.000000
3	45	0.000000	0.000000	0.000009
3	52	0.000000	0.000000	0.000010
3	47	0.000000	0.000000	0.000004
3	59	0.000000	0.000000	0.000004
3	61	0.000000	0.000000	0.000002
3	60	0.000000	0.000000	0.000002
3	62	0.000000	0.000000	0.000001
3	91	0.000000	0.000000	0.000001
3	88	0.000000	0.000000	0.000002
6	77	0.000000	0.000000	0.000001
6	33	0.000000	0.000000	0.000550
6	34	0.000000	0.000000	0.000209
6	99	0.000000	0.000000	0.000000
6	12	0.000000	0.000000	0.000068
6	18	0.000000	0.000000	0.000020
6	63	0.000000	0.000000	0.000003
6	66	0.000000	0.000000	0.000004
6	67	0.000000	0.000000	0.000003
6	94	0.000000	0.000000	0.000000
6	93	0.000000	0.000000	0.000000
6	51	0.000000	0.000000	0.000027
6	35	0.000000	0.000000	0.000297
6	38	0.000000	0.000000	0.000116
6	40	0.000000	0.000000	0.000096
6	31	0.000000	0.000000	0.000525
6	24	0.000000	0.000000	0.004165
6	49	0.000000	0.000000	0.000007
6	48	0.000000	0.000000	0.000003
6	73	0.000000	0.000000	0.000001
6	72	0.000000	0.000000	0.000003
6	89	0.000000	0.000000	0.000004
6	86	0.000000	0.000000	0.000017
6	20	0.000000	0.000000	0.000000
6	87	0.000000	0.000000	0.000009
6	21	0.000000	0.000000	0.000000
6	36	0.000000	0.000000	0.000233
6	41	0.000000	0.000000	0.000074
6	44	0.000000	0.000000	0.000039
6	70	0.000000	0.000000	0.000006
6	14	0.000000	0.000000	0.000044
6	90	0.000000	0.000000	0.000004
6	46	0.000000	0.000000	0.000017
6	69	0.000000	0.000000	0.000007
6	15	0.000000	0.000000	0.000048
6	42	0.000000	0.000000	0.000032
6	100	0.000000	0.000000	0.000000
6	84	0.000000	0.000000	0.000110
6	37	0.000000	0.000000	0.000184
6	17	0.000000	0.000000	0.000012
6	85	0.000000	0.000000	0.000043
6	43	0.000000	0.000000	0.000033
6	39	0.000000	0.000000	0.000108
6	92	0.000000	0.000000	0.000001
6	9	0.000000	0.000000	0.000112
6	32	0.000000	0.000000	0.001329
6	22	0.000000	0.000000	0.005101
6	16	0.000000	0.000000	0.000018
6	23	0.000000	0.000000	0.003268
6	25	0.000000	0.000000	0.005417
6	65	0.000000	0.000000	0.000005
6	53	0.000000	0.000000	0.000015
6	95	0.000000	0.000000	0.000000
6	7	0.127612	0.597686	0.902183
6	75	0.000000	0.000000	0.000000
6	5	0.000004	0.044161	0.535806
6	55	0.000000	0.000000	0.000005
6	4	0.000000	0.006569	0.366013
6	96	0.000000	0.000000	0.000000
6	1	0.000103	0.100790	0.631951
6	2	0.000000	0.000058	0.141988
6	10	0.000000	0.000000	0.000088
6	68	0.000000	0.000000	0.000010
6	29	0.000000	0.000000	0.000365
6	81	0.000000	0.000000	0.000002
6	98	0.000000	0.000000	0.000000
6	28	0.000000	0.000000	0.000275
6	30	0.000000	0.000000	0.000372
6	27	0.000000	0.000000	0.001161
6	26	0.000000	0.000000	0.001536
6	11	0.000000	0.000000	0.000067
6	13	0.000000	0.000000	0.000045
6	80	0.000000	0.000000	0.000002
6	82	0.000000	0.000000	0.000001
6	19	0.000000	0.000000	0.000002
6	57	0.000000	0.000000	0.000005
6	71	0.000000	0.000000	0.000004
6	83	0.000000	0.000000	0.000001
6	45	0.000000	0.000000	0.000019
6	52	0.000000	0.000000	0.000023
6	47	0.000000	0.000000	0.000009
6	59	0.000000	0.000000	0.000009
6	61	0.000000	0.000000	0.000004
6	60	0.000000	0.000000	0.000006
6	62	0.000000	0.000000	0.000003
6	91	0.000000	0.000000	0.000003
6	88	0.000000	0.000000	0.000005
77	33	0.000000	0.000000	0.001574
77	34	0.000000	0.000000	0.004675
77	99	0.000000	0.000000	0.000000
77	12	0.000000	0.000000	0.014811
77	18	0.000000	0.000000	0.039695
77	63	0.000000	0.000000	0.028508
77	66	0.000000	0.000134	0.167988
77	67	0.000000	0.000338	0.202156
77	94	0.000000	0.000000	0.000118
77	93	0.000000	0.000000	0.000113
77	51	0.000000	0.000000	0.018627
77	35	0.000000	0.000000	0.003850
77	38	0.000000	0.000000	0.006164
77	40	0.000000	0.000000	0.007520
77	31	0.000000	0.000000	0.002122
77	24	0.000000	0.000000	0.000250
77	49	0.000000	0.000006	0.091540
77	48	0.000000	0.002639	0.304981
77	73	0.003458	0.242502	0.753257
77	72	0.000156	0.111841	0.645238
77	89	0.000000	0.000000	0.005999
77	86	0.000000	0.000000	0.001232
77	20	0.000000	0.001574	0.275057
77	87	0.000000	0.000000	0.003024
77	21	0.000000	0.000004	0.084171
77	36	0.000000	0.000000	0.009767
77	41	0.000000	0.000000	0.011540
77	44	0.000000	0.000000	0.037786
77	70	0.000000	0.000353	0.203928
77	14	0.000000	0.000000	0.028570
77	90	0.000000	0.000000	0.009755
77	46	0.000000	0.000003	0.079666
77	69	0.000000	0.000067	0.146242
77	15	0.000000	0.000000	0.021583
77	42	0.000000	0.000000	0.030864
77	100	0.000000	0.000000	0.000000
77	84	0.000000	0.000000	0.000531
77	37	0.000000	0.000000	0.004552
77	17	0.000000	0.000000	0.025700
77	85	0.000000	0.000000	0.000729
77	43	0.000000	0.000000	0.035949
77	39	0.000000	0.000000	0.007185
77	92	0.000000	0.000000	0.000268
77	9	0.000000	0.000000	0.007609
77	32	0.000000	0.000000	0.003931
77	22	0.000000	0.000000	0.000210
77	16	0.000000	0.000000	0.032123
77	23	0.000000	0.000000	0.000416
77	25	0.000000	0.000000	0.000232
77	65	0.000000	0.000019	0.113935
77	53	0.000000	0.000000	0.050011
77	95	0.000000	0.000000	0.000036
77	7	0.000000	0.000000	0.000001
77	75	0.000084	0.095687	0.625419
77	5	0.000000	0.000000	0.000001
77	55	0.000000	0.000018	0.111928
77	4	0.000000	0.000000	0.000001
77	96	0.000000	0.000000	0.000000
77	1	0.000000	0.000000	0.000000
77	2	0.000000	0.000000	0.000000
77	10	0.000000	0.000000	0.009641
77	68	0.000000	0.000006	0.089313
77	29	0.000000	0.000000	0.002758
77	81	0.000000	0.016410	0.439562
77	98	0.000000	0.000000	0.000000
77	28	0.000000	0.000000	0.003486
77	30	0.000000	0.000000	0.002661
77	27	0.000000	0.000000	0.000915
77	26	0.000000	0.000000	0.000689
77	11	0.000000	0.000000	0.012329
77	13	0.000000	0.000000	0.015638
77	80	0.000000	0.005244	0.349891
77	82	0.000032	0.075376	0.596275
77	19	0.000000	0.000088	0.154483
77	57	0.000000	0.000000	0.052771
77	71	0.000000	0.000541	0.222172
77	83	0.000000	0.000200	0.182016
77	45	0.000000	0.000000	0.043335
77	52	0.000000	0.000000	0.026967
77	47	0.000000	0.000007	0.093618
77	59	0.000000	0.000000	0.027594
77	61	0.000000	0.000000	0.030589
77	60	0.000000	0.000000	0.021946
77	62	0.000000	0.000000	0.041334
77	91	0.000000	0.000000	0.014830
77	88	0.000000	0.000000	0.002698
33	34	0.000000	0.009597	0.394842
33	99	0.000000	0.000000	0.000002
33	12	0.000000	0.000001	0.060069
33	18	0.000000	0.000000	0.021130
33	63	0.000000	0.000000	0.005257
33	66	0.000000	0.000000	0.004942
33	67	0.000000	0.000000	0.004433
33	94	0.000000	0.000000	0.000107
33	93	0.000000	0.000000	0.000086
33	51	0.000000	0.000001	0.058203
33	35	0.000045	0.081682	0.605935
33	38	0.000000	0.001071	0.254680
33	40	0.000000	0.000425	0.211729
33	31	0.000000	0.016355	0.439266
33	24	0.000000	0.000048	0.136575
33	49	0.000000	0.000000	0.014729
33	48	0.000000	0.000000	0.007321
33	73	0.000000	0.000000	0.002069
33	72	0.000000	0.000000	0.004899
33	89	0.000000	0.000000	0.005236
33	86	0.000000	0.000000	0.011300
33	20	0.000000	0.000000	0.000430
33	87	0.000000	0.000000	0.009364
33	21	0.000000	0.000000	0.000116
33	36	0.000000	0.010171	0.399456
33	41	0.000000	0.000105	0.160015
33	44	0.000000	0.000004	0.085082
33	70	0.000000	0.000000	0.009928
33	14	0.000000	0.000000	0.054126
33	90	0.000000	0.000000	0.006455
33	46	0.000000	0.000000	0.031448
33	69	0.000000	0.000000	0.009980
33	15	0.000000	0.000002	0.069472
33	42	0.000000	0.000001	0.059455
33	100	0.000000	0.000000	0.000001
33	84	0.000000	0.000000	0.032501
33	37	0.000000	0.010482	0.401872
33	17	0.000000	0.000000	0.006088
33	85	0.000000	0.000000	0.019373
33	43	0.000000	0.000002	0.069758
33	39	0.000000	0.000607	0.227351
33	92	0.000000	0.000000	0.000498
33	9	0.000000	0.000002	0.069493
33	32	0.001893	0.208592	0.730902
33	22	0.000000	0.000006	0.091072
33	16	0.000000	0.000000	0.013762
33	23	0.000000	0.000098	0.157764
33	25	0.000000	0.000060	0.143078
33	65	0.000000	0.000000	0.005777
33	53	0.000000	0.000000	0.033865
33	95	0.000000	0.000000	0.000064
33	7	0.000000	0.000000	0.000784
33	75	0.000000	0.000000	0.000853
33	5	0.000000	0.000000	0.000396
33	55	0.000000	0.000000	0.010155
33	4	0.000000	0.000000	0.000439
33	96	0.000000	0.000000	0.000002
33	1	0.000000	0.000000	0.000278
33	2	0.000000	0.000000	0.000153
33	10	0.000000	0.000001	0.062378
33	68	0.000000	0.000000	0.012504
33	29	0.000000	0.000179	0.178096
33	81	0.000000	0.000000	0.003682
33	98	0.000000	0.000000	0.000002
33	28	0.000000	0.000035	0.128164
33	30	0.000000	0.000418	0.211022
33	27	0.000000	0.000804	0.240452
33	26	0.000000	0.000936	0.247882
33	11	0.000000	0.000000	0.051580
33	13	0.000000	0.000000	0.029207
33	80	0.000000	0.000000	0.004759
33	82	0.000000	0.000000	0.002434
33	19	0.000000	0.000000	0.001744
33	57	0.000000	0.000000	0.011089
33	71	0.000000	0.000000	0.005681
33	83	0.000000	0.000000	0.001986
33	45	0.000000	0.000000	0.039518
33	52	0.000000	0.000000	0.051218
33	47	0.000000	0.000000	0.018576
33	59	0.000000	0.000000	0.019388
33	61	0.000000	0.000000	0.008172
33	60	0.000000	0.000000	0.011257
33	62	0.000000	0.000000	0.006780
33	91	0.000000	0.000000	0.004670
33	88	0.000000	0.000000	0.005617
34	99	0.000000	0.000000	0.000001
34	12	0.000000	0.000104	0.159874
34	18	0.000000	0.000001	0.061642
34	63	0.000000	0.000000	0.010277
34	66	0.000000	0.000000	0.014978
34	67	0.000000	0.000000	0.013463
34	94	0.000000	0.000000	0.000115
34	93	0.000000	0.000000	0.000094
34	51	0.000000	0.000026	0.120772
34	35	0.144789	0.616857	0.907898
34	38	0.000000	0.020366	0.458965
34	40	0.000000	0.014143	0.426685
34	31	0.000000	0.015258	0.433210
34	24	0.000000	0.000001	0.058223
34	49	0.000000	0.000000	0.038754
34	48	0.000000	0.000000	0.019885
34	73	0.000000	0.000000	0.006278
34	72	0.000000	0.000000	0.014893
34	89	0.000000	0.000000	0.007463
34	86	0.000000	0.000000	0.010391
34	20	0.000000	0.000000	0.001298
34	87	0.000000	0.000000	0.010997
34	21	0.000000	0.000000	0.000347
34	36	0.891434	0.971678	0.994270
34	41	0.000000	0.008259	0.383166
34	44	0.000000	0.000459	0.214943
34	70	0.000000	0.000000	0.029946
34	14	0.000000	0.000108	0.160949
34	90	0.000000	0.000000	0.010137
34	46	0.000000	0.000007	0.094043
34	69	0.000000	0.000000	0.030299
34	15	0.000000	0.000402	0.209365
34	42	0.000000	0.000176	0.177536
34	100	0.000000	0.000000	0.000001
34	84	0.000000	0.000000	0.020002
34	37	0.000017	0.064149	0.577349
34	17	0.000000	0.000000	0.016072
34	85	0.000000	0.000000	0.014307
34	43	0.000000	0.000248	0.190107
34	39	0.000000	0.005342	0.351195
34	92	0.000000	0.000000	0.000501
34	9	0.000000	0.000097	0.157414
34	32	0.005037	0.266410	0.767556
34	22	0.000000	0.000000	0.043435
34	16	0.000000	0.000000	0.038254
34	23	0.000000	0.000004	0.083330
34	25	0.000000	0.000001	0.056761
34	65	0.000000	0.000000	0.017338
34	53	0.000000	0.000004	0.082397
34	95	0.000000	0.000000	0.000059
34	7	0.000000	0.000000	0.000299
34	75	0.000000	0.000000	0.002541
34	5	0.000000	0.000000	0.000159
34	55	0.000000	0.000000	0.024058
34	4	0.000000	0.000000	0.000182
34	96	0.000000	0.000000	0.000001
34	1	0.000000	0.000000	0.000105
34	2	0.000000	0.000000	0.000066
34	10	0.000000	0.000080	0.151498
34	68	0.000000	0.000000	0.037786
34	29	0.000000	0.001128	0.257317
34	81	0.000000	0.000000	0.010567
34	98	0.000000	0.000000	0.000001
34	28	0.000000	0.000420	0.211143
34	30	0.000000	0.002308	0.296914
34	27	0.000000	0.000121	0.164718
34	26	0.000000	0.000055	0.140824
34	11	0.000000	0.000040	0.132064
34	13	0.000000	0.000002	0.075222
34	80	0.000000	0.000000	0.013724
34	82	0.000000	0.000000	0.006946
34	19	0.000000	0.000000	0.005253
34	57	0.000000	0.000000	0.024831
34	71	0.000000	0.000000	0.017277
34	83	0.000000	0.000000	0.004989
34	45	0.000000	0.000014	0.107438
34	52	0.000000	0.000017	0.110955
34	47	0.000000	0.000000	0.051653
34	59	0.000000	0.000000	0.038193
34	61	0.000000	0.000000	0.016185
34	60	0.000000	0.000000	0.020755
34	62	0.000000	0.000000	0.014047
34	91	0.000000	0.000000	0.007888
34	88	0.000000	0.000000	0.006735
99	12	0.000000	0.000000	0.000000
99	18	0.000000	0.000000	0.000000
99	63	0.000000	0.000000	0.000017
99	66	0.000000	0.000000	0.000000
99	67	0.000000	0.000000	0.000000
99	94	0.000000	0.000000	0.004313
99	93	0.000000	0.000000	0.004070
99	51	0.000000	0.000000	0.000006
99	35	0.000000	0.000000	0.000002
99	38	0.000000	0.000000	0.000003
99	40	0.000000	0.000000	0.000003
99	31	0.000000	0.000000	0.000001
99	24	0.000000	0.000000	0.000000
99	49	0.000000	0.000000	0.000003
99	48	0.000000	0.000000	0.000002
99	73	0.000000	0.000000	0.000000
99	72	0.000000	0.000000	0.000001
99	89	0.000000	0.000000	0.000088
99	86	0.000000	0.000000	0.000161
99	20	0.000000	0.000000	0.000000
99	87	0.000000	0.000000	0.000104
99	21	0.000000	0.000000	0.000000
99	36	0.000000	0.000000	0.000003
99	41	0.000000	0.000000	0.000003
99	44	0.000000	0.000000	0.000003
99	70	0.000000	0.000000	0.000001
99	14	0.000000	0.000000	0.000000
99	90	0.000000	0.000000	0.000071
99	46	0.000000	0.000000	0.000001
99	69	0.000000	0.000000	0.000000
99	15	0.000000	0.000000	0.000001
99	42	0.000000	0.000000	0.000001
99	100	0.000000	0.010893	0.404976
99	84	0.000000	0.000000	0.000080
99	37	0.000000	0.000000	0.000003
99	17	0.000000	0.000000	0.000000
99	85	0.000000	0.000000	0.000113
99	43	0.000000	0.000000	0.000002
99	39	0.000000	0.000000	0.000005
99	92	0.000000	0.000000	0.002281
99	9	0.000000	0.000000	0.000000
99	32	0.000000	0.000000	0.000001
99	22	0.000000	0.000000	0.000000
99	16	0.000000	0.000000	0.000000
99	23	0.000000	0.000000	0.000000
99	25	0.000000	0.000000	0.000001
99	65	0.000000	0.000000	0.000000
99	53	0.000000	0.000000	0.000005
99	95	0.000000	0.000000	0.016538
99	7	0.000000	0.000000	0.000000
99	75	0.000000	0.000000	0.000000
99	5	0.000000	0.000000	0.000000
99	55	0.000000	0.000000	0.000008
99	4	0.000000	0.000000	0.000000
99	96	0.000000	0.000000	0.015372
99	1	0.000000	0.000000	0.000000
99	2	0.000000	0.000000	0.000000
99	10	0.000000	0.000000	0.000000
99	68	0.000000	0.000000	0.000000
99	29	0.000000	0.000000	0.000000
99	81	0.000000	0.000000	0.000001
99	98	0.013354	0.339941	0.805899
99	28	0.000000	0.000000	0.000000
99	30	0.000000	0.000000	0.000000
99	27	0.000000	0.000000	0.000000
99	26	0.000000	0.000000	0.000000
99	11	0.000000	0.000000	0.000000
99	13	0.000000	0.000000	0.000000
99	80	0.000000	0.000000	0.000001
99	82	0.000000	0.000000	0.000001
99	19	0.000000	0.000000	0.000000
99	57	0.000000	0.000000	0.000007
99	71	0.000000	0.000000	0.000000
99	83	0.000000	0.000000	0.000004
99	45	0.000000	0.000000	0.000003
99	52	0.000000	0.000000	0.000007
99	47	0.000000	0.000000	0.000002
99	59	0.000000	0.000000	0.000012
99	61	0.000000	0.000000	0.000015
99	60	0.000000	0.000000	0.000017
99	62	0.000000	0.000000	0.000013
99	91	0.000000	0.000000	0.000041
99	88	0.000000	0.000000	0.000142
12	18	0.000000	0.009629	0.395108
12	63	0.000000	0.000000	0.006968
12	66	0.000000	0.000003	0.077079
12	67	0.000000	0.000001	0.066338
12	94	0.000000	0.000000	0.000036
12	93	0.000000	0.000000	0.000031
12	51	0.000000	0.000001	0.055582
12	35	0.000000	0.000032	0.126053
12	38	0.000000	0.000006	0.091329
12	40	0.000000	0.000010	0.100071
12	31	0.000000	0.000032	0.125936
12	24	0.000000	0.000000	0.016931
12	49	0.000000	0.000000	0.048718
12	48	0.000000	0.000000	0.035403
12	73	0.000000	0.000000	0.025984
12	72	0.000000	0.000001	0.062277
12	89	0.000000	0.000000	0.002959
12	86	0.000000	0.000000	0.002289
12	20	0.000000	0.000000	0.005305
12	87	0.000000	0.000000	0.003185
12	21	0.000000	0.000000	0.001344
12	36	0.000000	0.001788	0.282146
12	41	0.000000	0.000032	0.125891
12	44	0.000000	0.000029	0.124017
12	70	0.000000	0.000008	0.094565
12	14	0.000631	0.158519	0.691857
12	90	0.000000	0.000000	0.004490
12	46	0.000000	0.000217	0.185078
12	69	0.000000	0.000055	0.140638
12	15	0.000001	0.026617	0.484207
12	42	0.000000	0.000731	0.235940
12	100	0.000000	0.000000	0.000000
12	84	0.000000	0.000000	0.003103
12	37	0.000000	0.000006	0.090826
12	17	0.000000	0.000036	0.129265
12	85	0.000000	0.000000	0.002545
12	43	0.000000	0.000110	0.161597
12	39	0.000000	0.000003	0.079208
12	92	0.000000	0.000000	0.000139
12	9	0.000462	0.146640	0.681163
12	32	0.000000	0.000264	0.192416
12	22	0.000000	0.000000	0.016005
12	16	0.000000	0.002266	0.295829
12	23	0.000000	0.000000	0.030999
12	25	0.000000	0.000000	0.014685
12	65	0.000000	0.000010	0.100538
12	53	0.000000	0.000001	0.063184
12	95	0.000000	0.000000	0.000016
12	7	0.000000	0.000000	0.000096
12	75	0.000000	0.000000	0.008624
12	5	0.000000	0.000000	0.000060
12	55	0.000000	0.000000	0.023492
12	4	0.000000	0.000000	0.000075
12	96	0.000000	0.000000	0.000000
12	1	0.000000	0.000000	0.000034
12	2	0.000000	0.000000	0.000031
12	10	0.045214	0.461125	0.856572
12	68	0.000000	0.000234	0.187866
12	29	0.000000	0.000578	0.225100
12	81	0.000000	0.000000	0.024727
12	98	0.000000	0.000000	0.000000
12	28	0.000000	0.002571	0.303413
12	30	0.000000	0.000349	0.203522
12	27	0.000000	0.000001	0.068071
12	26	0.000000	0.000000	0.048841
12	11	0.952225	0.987836	0.997555
12	13	0.000028	0.072982	0.592438
12	80	0.000000	0.000000	0.031934
12	82	0.000000	0.000000	0.016531
12	19	0.000000	0.000000	0.030843
12	57	0.000000	0.000000	0.020534
12	71	0.000000	0.000002	0.073531
12	83	0.000000	0.000000	0.007346
12	45	0.000000	0.000017	0.111303
12	52	0.000000	0.000001	0.057951
12	47	0.000000	0.000003	0.076156
12	59	0.000000	0.000000	0.021337
12	61	0.000000	0.000000	0.010625
12	60	0.000000	0.000000	0.011359
12	62	0.000000	0.000000	0.010613
12	91	0.000000	0.000000	0.004230
12	88	0.000000	0.000000	0.002073
18	63	0.000000	0.000000	0.009732
18	66	0.000000	0.000585	0.225629
18	67	0.000000	0.000270	0.193307
18	94	0.000000	0.000000	0.000038
18	93	0.000000	0.000000	0.000033
18	51	0.000000	0.000000	0.048506
18	35	0.000000	0.000000	0.047175
18	38	0.000000	0.000000	0.046222
18	40	0.000000	0.000000	0.053567
18	31	0.000000	0.000000	0.039988
18	24	0.000000	0.000000	0.005167
18	49	0.000000	0.000003	0.076522
18	48	0.000000	0.000002	0.073738
18	73	0.000000	0.000002	0.074212
18	72	0.000000	0.000165	0.175136
18	89	0.000000	0.000000	0.003222
18	86	0.000000	0.000000	0.001693
18	20	0.000000	0.000000	0.015345
18	87	0.000000	0.000000	0.002817
18	21	0.000000	0.000000	0.003880
18	36	0.000000	0.000016	0.109935
18	41	0.000000	0.000002	0.074116
18	44	0.000000	0.000011	0.102631
18	70	0.000000	0.000584	0.225605
18	14	0.000021	0.067556	0.583355
18	90	0.000000	0.000000	0.005116
18	46	0.000000	0.001234	0.261975
18	69	0.000000	0.009532	0.394308
18	15	0.000000	0.003655	0.325527
18	42	0.000000	0.000541	0.222166
18	100	0.000000	0.000000	0.000000
18	84	0.000000	0.000000	0.001679
18	37	0.000000	0.000000	0.040928
18	17	0.000000	0.000843	0.242727
18	85	0.000000	0.000000	0.001580
18	43	0.000000	0.000113	0.162470
18	39	0.000000	0.000000	0.043980
18	92	0.000000	0.000000	0.000132
18	9	0.000000	0.000429	0.212093
18	32	0.000000	0.000001	0.065802
18	22	0.000000	0.000000	0.004828
18	16	0.000035	0.076662	0.598296
18	23	0.000000	0.000000	0.009385
18	25	0.000000	0.000000	0.004512
18	65	0.000000	0.002238	0.295101
18	53	0.000000	0.000002	0.072271
18	95	0.000000	0.000000	0.000015
18	7	0.000000	0.000000	0.000029
18	75	0.000000	0.000000	0.023860
18	5	0.000000	0.000000	0.000018
18	55	0.000000	0.000000	0.039322
18	4	0.000000	0.000000	0.000023
18	96	0.000000	0.000000	0.000000
18	1	0.000000	0.000000	0.000010
18	2	0.000000	0.000000	0.000010
18	10	0.000000	0.001402	0.268745
18	68	0.000003	0.041613	0.529474
18	29	0.000000	0.000001	0.067909
18	81	0.000000	0.000001	0.057544
18	98	0.000000	0.000000	0.000000
18	28	0.000000	0.000006	0.091438
18	30	0.000000	0.000001	0.061932
18	27	0.000000	0.000000	0.020685
18	26	0.000000	0.000000	0.014887
18	11	0.000000	0.005014	0.346762
18	13	0.000000	0.017737	0.446453
18	80	0.000000	0.000002	0.072788
18	82	0.000000	0.000000	0.039635
18	19	0.000000	0.000006	0.089773
18	57	0.000000	0.000000	0.028991
18	71	0.000000	0.000368	0.205690
18	83	0.000000	0.000000	0.015222
18	45	0.000000	0.000036	0.128900
18	52	0.000000	0.000000	0.053959
18	47	0.000000	0.000025	0.120175
18	59	0.000000	0.000000	0.024405
18	61	0.000000	0.000000	0.014161
18	60	0.000000	0.000000	0.013732
18	62	0.000000	0.000000	0.015273
18	91	0.000000	0.000000	0.005466
18	88	0.000000	0.000000	0.001951
63	66	0.000000	0.000000	0.012476
63	67	0.000000	0.000000	0.013512
63	94	0.000000	0.000000	0.003872
63	93	0.000000	0.000000	0.003533
63	51	0.000000	0.000010	0.100147
63	35	0.000000	0.000000	0.010192
63	38	0.000000	0.000000	0.023181
63	40	0.000000	0.000000	0.026737
63	31	0.000000	0.000000	0.003732
63	24	0.000000	0.000000	0.000584
63	49	0.000000	0.000081	0.151896
63	48	0.000000	0.000101	0.158943
63	73	0.000000	0.000000	0.021238
63	72	0.000000	0.000000	0.037535
63	89	0.000000	0.000841	0.242616
63	86	0.000000	0.000000	0.040728
63	20	0.000000	0.000000	0.008102
63	87	0.000000	0.000014	0.106669
63	21	0.000000	0.000000	0.003501
63	36	0.000000	0.000000	0.025442
63	41	0.000000	0.000000	0.034708
63	44	0.000000	0.000008	0.096391
63	70	0.000000	0.000000	0.037297
63	14	0.000000	0.000000	0.013976
63	90	0.000000	0.008744	0.387561
63	46	0.000000	0.000001	0.068034
63	69	0.000000	0.000000	0.021603
63	15	0.000000	0.000000	0.016306
63	42	0.000000	0.000000	0.033624
63	100	0.000000	0.000000	0.000006
63	84	0.000000	0.000000	0.010711
63	37	0.000000	0.000000	0.016748
63	17	0.000000	0.000000	0.002547
63	85	0.000000	0.000000	0.018647
63	43	0.000000	0.000000	0.053736
63	39	0.000000	0.000000	0.031948
63	92	0.000000	0.000000	0.010503
63	9	0.000000	0.000000	0.004058
63	32	0.000000	0.000000	0.006776
63	22	0.000000	0.000000	0.000401
63	16	0.000000	0.000000	0.005268
63	23	0.000000	0.000000	0.000742
63	25	0.000000	0.000000	0.000616
63	65	0.000000	0.000000	0.009640
63	53	0.000000	0.000419	0.211059
63	95	0.000000	0.000000	0.001304
63	7	0.000000	0.000000	0.000004
63	75	0.000000	0.000000	0.018159
63	5	0.000000	0.000000	0.000002
63	55	0.000003	0.042310	0.531236
63	4	0.000000	0.000000	0.000002
63	96	0.000000	0.000000	0.000003
63	1	0.000000	0.000000	0.000001
63	2	0.000000	0.000000	0.000001
63	10	0.000000	0.000000	0.004776
63	68	0.000000	0.000000	0.015325
63	29	0.000000	0.000000	0.002741
63	81	0.000000	0.000002	0.070760
63	98	0.000000	0.000000	0.000017
63	28	0.000000	0.000000	0.002768
63	30	0.000000	0.000000	0.002997
63	27	0.000000	0.000000	0.001420
63	26	0.000000	0.000000	0.001242
63	11	0.000000	0.000000	0.005471
63	13	0.000000	0.000000	0.004466
63	80	0.000000	0.000002	0.070491
63	82	0.000000	0.000001	0.062663
63	19	0.000000	0.000000	0.005702
63	57	0.000000	0.012994	0.419513
63	71	0.000000	0.000000	0.019883
63	83	0.000000	0.000188	0.179779
63	45	0.000000	0.000005	0.085272
63	52	0.000000	0.000160	0.174056
63	47	0.000000	0.000010	0.099774
63	59	0.000000	0.006725	0.367743
63	61	0.002775	0.229523	0.745015
63	60	0.000004	0.043959	0.535315
63	62	0.037195	0.439157	0.848250
63	91	0.000032	0.075250	0.596076
63	88	0.000000	0.000013	0.106185
66	67	0.612532	0.884672	0.975790
66	94	0.000000	0.000000	0.000042
66	93	0.000000	0.000000	0.000038
66	51	0.000000	0.000000	0.026077
66	35	0.000000	0.000000	0.011666
66	38	0.000000	0.000000	0.014412
66	40	0.000000	0.000000	0.017289
66	31	0.000000	0.000000	0.008353
66	24	0.000000	0.000000	0.001034
66	49	0.000000	0.000004	0.085093
66	48	0.000000	0.000081	0.152123
66	73	0.000000	0.006383	0.363915
66	72	0.000923	0.174311	0.705123
66	89	0.000000	0.000000	0.003097
66	86	0.000000	0.000000	0.001014
66	20	0.000000	0.000003	0.078364
66	87	0.000000	0.000000	0.002067
66	21	0.000000	0.000000	0.019810
66	36	0.000000	0.000000	0.026898
66	41	0.000000	0.000000	0.025856
66	44	0.000000	0.000001	0.057697
66	70	0.000000	0.009689	0.395598
66	14	0.000000	0.000040	0.131823
66	90	0.000000	0.000000	0.005081
66	46	0.000000	0.000072	0.148390
66	69	0.000203	0.119430	0.653766
66	15	0.000000	0.000004	0.082440
66	42	0.000000	0.000004	0.084074
66	100	0.000000	0.000000	0.000000
66	84	0.000000	0.000000	0.000685
66	37	0.000000	0.000000	0.011630
66	17	0.000000	0.000154	0.172781
66	85	0.000000	0.000000	0.000764
66	43	0.000000	0.000003	0.077473
66	39	0.000000	0.000000	0.015045
66	92	0.000000	0.000000	0.000120
66	9	0.000000	0.000000	0.041279
66	32	0.000000	0.000000	0.014494
66	22	0.000000	0.000000	0.000946
66	16	0.000000	0.000468	0.215754
66	23	0.000000	0.000000	0.001848
66	25	0.000000	0.000000	0.000916
66	65	0.008413	0.302857	0.787495
66	53	0.000000	0.000000	0.049711
66	95	0.000000	0.000000	0.000014
66	7	0.000000	0.000000	0.000006
66	75	0.000000	0.000017	0.111478
66	5	0.000000	0.000000	0.000004
66	55	0.000000	0.000001	0.059548
66	4	0.000000	0.000000	0.000004
66	96	0.000000	0.000000	0.000000
66	1	0.000000	0.000000	0.000002
66	2	0.000000	0.000000	0.000002
66	10	0.000000	0.000000	0.052260
66	68	0.000000	0.021895	0.465659
66	29	0.000000	0.000000	0.013277
66	81	0.000000	0.000112	0.162018
66	98	0.000000	0.000000	0.000000
66	28	0.000000	0.000000	0.017767
66	30	0.000000	0.000000	0.012235
66	27	0.000000	0.000000	0.004086
66	26	0.000000	0.000000	0.002964
66	11	0.000000	0.000001	0.067451
66	13	0.000000	0.000009	0.097302
66	80	0.000000	0.000199	0.181960
66	82	0.000000	0.000035	0.128405
66	19	0.000000	0.009457	0.393684
66	57	0.000000	0.000000	0.033039
66	71	0.002099	0.214034	0.734677
66	83	0.000000	0.000000	0.039709
66	45	0.000000	0.000003	0.075894
66	52	0.000000	0.000000	0.031247
66	47	0.000000	0.000021	0.115799
66	59	0.000000	0.000000	0.021029
66	61	0.000000	0.000000	0.016163
66	60	0.000000	0.000000	0.013466
66	62	0.000000	0.000000	0.019626
66	91	0.000000	0.000000	0.006485
66	88	0.000000	0.000000	0.001590
67	94	0.000000	0.000000	0.000045
67	93	0.000000	0.000000	0.000042
67	51	0.000000	0.000000	0.025561
67	35	0.000000	0.000000	0.010533
67	38	0.000000	0.000000	0.013366
67	40	0.000000	0.000000	0.016079
67	31	0.000000	0.000000	0.007342
67	24	0.000000	0.000000	0.000901
67	49	0.000000	0.000005	0.088411
67	48	0.000000	0.000135	0.168270
67	73	0.000000	0.016311	0.439034
67	72	0.011586	0.328080	0.800195
67	89	0.000000	0.000000	0.003276
67	86	0.000000	0.000000	0.001025
67	20	0.000000	0.000007	0.093471
67	87	0.000000	0.000000	0.002129
67	21	0.000000	0.000000	0.023624
67	36	0.000000	0.000000	0.024629
67	41	0.000000	0.000000	0.024181
67	44	0.000000	0.000001	0.056567
67	70	0.000000	0.011554	0.409777
67	14	0.000000	0.000021	0.115460
67	90	0.000000	0.000000	0.005383
67	46	0.000000	0.000063	0.144393
67	69	0.000025	0.070785	0.588827
67	15	0.000000	0.000002	0.073530
67	42	0.000000	0.000003	0.077993
67	100	0.000000	0.000000	0.000000
67	84	0.000000	0.000000	0.000664
67	37	0.000000	0.000000	0.010679
67	17	0.000000	0.000069	0.146998
67	85	0.000000	0.000000	0.000754
67	43	0.000000	0.000002	0.073687
67	39	0.000000	0.000000	0.014111
67	92	0.000000	0.000000	0.000128
67	9	0.000000	0.000000	0.035304
67	32	0.000000	0.000000	0.012844
67	22	0.000000	0.000000	0.000819
67	16	0.000000	0.000196	0.181360
67	23	0.000000	0.000000	0.001602
67	25	0.000000	0.000000	0.000802
67	65	0.000272	0.128463	0.663369
67	53	0.000000	0.000000	0.049860
67	95	0.000000	0.000000	0.000015
67	7	0.000000	0.000000	0.000005
67	75	0.000000	0.000044	0.134635
67	5	0.000000	0.000000	0.000003
67	55	0.000000	0.000001	0.064603
67	4	0.000000	0.000000	0.000004
67	96	0.000000	0.000000	0.000000
67	1	0.000000	0.000000	0.000002
67	2	0.000000	0.000000	0.000002
67	10	0.000000	0.000000	0.044725
67	68	0.000000	0.011510	0.409463
67	29	0.000000	0.000000	0.011459
67	81	0.000000	0.000225	0.186460
67	98	0.000000	0.000000	0.000000
67	28	0.000000	0.000000	0.015260
67	30	0.000000	0.000000	0.010604
67	27	0.000000	0.000000	0.003544
67	26	0.000000	0.000000	0.002578
67	11	0.000000	0.000001	0.057714
67	13	0.000000	0.000004	0.082251
67	80	0.000000	0.000366	0.205453
67	82	0.000000	0.000080	0.151411
67	19	0.000000	0.012510	0.416341
67	57	0.000000	0.000000	0.034967
67	71	0.008126	0.300240	0.786129
67	83	0.000000	0.000000	0.046050
67	45	0.000000	0.000002	0.073799
67	52	0.000000	0.000000	0.031119
67	47	0.000000	0.000022	0.117398
67	59	0.000000	0.000000	0.021714
67	61	0.000000	0.000000	0.017241
67	60	0.000000	0.000000	0.014150
67	62	0.000000	0.000000	0.021181
67	91	0.000000	0.000000	0.006994
67	88	0.000000	0.000000	0.001658
94	93	0.150499	0.622850	0.909655
94	51	0.000000	0.000000	0.000758
94	35	0.000000	0.000000	0.000133
94	38	0.000000	0.000000	0.000291
94	40	0.000000	0.000000	0.000300
94	31	0.000000	0.000000	0.000047
94	24	0.000000	0.000000	0.000015
94	49	0.000000	0.000000	0.000538
94	48	0.000000	0.000000	0.000543
94	73	0.000000	0.000000	0.000082
94	72	0.000000	0.000000	0.000135
94	89	0.000000	0.000000	0.016514
94	86	0.000000	0.000000	0.012409
94	20	0.000000	0.000000	0.000045
94	87	0.000000	0.000000	0.012973
94	21	0.000000	0.000000	0.000028
94	36	0.000000	0.000000	0.000252
94	41	0.000000	0.000000	0.000304
94	44	0.000000	0.000000	0.000482
94	70	0.000000	0.000000	0.000125
94	14	0.000000	0.000000	0.000067
94	90	0.000000	0.000000	0.013818
94	46	0.000000	0.000000	0.000259
94	69	0.000000	0.000000	0.000073
94	15	0.000000	0.000000	0.000085
94	42	0.000000	0.000000	0.000169
94	100	0.000000	0.000000	0.001490
94	84	0.000000	0.000000	0.002752
94	37	0.000000	0.000000	0.000257
94	17	0.000000	0.000000	0.000009
94	85	0.000000	0.000000	0.005269
94	43	0.000000	0.000000	0.000312
94	39	0.000000	0.000000	0.000433
94	92	0.000000	0.001756	0.281117
94	9	0.000000	0.000000	0.000024
94	32	0.000000	0.000000	0.000083
94	22	0.000000	0.000000	0.000009
94	16	0.000000	0.000000	0.000020
94	23	0.000000	0.000000	0.000014
94	25	0.000000	0.000000	0.000018
94	65	0.000000	0.000000	0.000032
94	53	0.000000	0.000000	0.000896
94	95	0.000000	0.003292	0.318782
94	7	0.000000	0.000000	0.000000
94	75	0.000000	0.000000	0.000086
94	5	0.000000	0.000000	0.000000
94	55	0.000000	0.000000	0.001889
94	4	0.000000	0.000000	0.000000
94	96	0.000000	0.000000	0.000222
94	1	0.000000	0.000000	0.000000
94	2	0.000000	0.000000	0.000000
[truncated: 2,952 more rows]

## Sheet: Prob. of connection with SS
		Scenario 4 (5 km movements, with stepping stones)	Scenario 5 (20 km movements, with stepping stones)	Scenario 6 (100 km movements, with stepping stones)
Node 1	Node 2	Probability of connection	Probability of connection	Probability of connection
1	10	0.000000	0.000000	0.000044
1	100	0.000000	0.000000	0.000000
1	101	0.000000	0.000000	0.000001
1	102	0.000000	0.000000	0.000012
1	103	0.000000	0.000000	0.000008
1	104	0.000000	0.000000	0.000001
1	105	0.000000	0.000000	0.000001
1	106	0.000000	0.000000	0.000004
1	107	0.000000	0.000000	0.000001
1	108	0.000000	0.000000	0.000001
1	109	0.000000	0.000000	0.000000
1	11	0.000000	0.000000	0.000034
1	110	0.000000	0.000000	0.001310
1	111	0.000000	0.000000	0.000001
1	112	0.000000	0.000000	0.000001
1	113	0.000000	0.000000	0.000001
1	114	0.000000	0.000000	0.000001
1	115	0.000000	0.000000	0.000609
1	116	0.000000	0.000000	0.001000
1	117	0.000000	0.000000	0.000011
1	118	0.000000	0.000000	0.000001
1	119	0.000000	0.000000	0.000001
1	12	0.000000	0.000000	0.000034
1	120	0.000000	0.000000	0.000001
1	121	0.000000	0.000000	0.000001
1	122	0.000000	0.000000	0.000001
1	123	0.000000	0.000000	0.000001
1	124	0.000000	0.000000	0.000001
1	125	0.000000	0.000000	0.000033
1	126	0.000000	0.000000	0.000000
1	127	0.000000	0.000000	0.000000
1	128	0.000000	0.000000	0.000001
1	129	0.000000	0.000000	0.000001
1	13	0.000000	0.000000	0.000022
1	130	0.000000	0.000000	0.000134
1	131	0.000000	0.000000	0.000001
1	132	0.000000	0.000000	0.000007
1	133	0.000000	0.000000	0.006632
1	134	0.000000	0.000000	0.000000
1	135	0.000000	0.000000	0.000000
1	136	0.000000	0.000000	0.000000
1	137	0.000000	0.000000	0.000032
1	138	0.000000	0.000000	0.000010
1	139	0.000000	0.000000	0.000001
1	14	0.000000	0.000000	0.000022
1	140	0.000000	0.000000	0.000759
1	141	0.000000	0.000000	0.000002
1	142	0.000000	0.000000	0.000001
1	143	0.000000	0.000000	0.009936
1	144	0.000000	0.000000	0.000001
1	145	0.000000	0.000000	0.000001
1	146	0.000000	0.000000	0.000002
1	147	0.000000	0.000000	0.000002
1	148	0.000000	0.000000	0.000001
1	149	0.000000	0.000000	0.001673
1	15	0.000000	0.000000	0.000024
1	150	0.000000	0.000000	0.002628
1	151	0.000000	0.000000	0.000006
1	152	0.000000	0.000000	0.000003
1	153	0.000000	0.000000	0.000007
1	154	0.000000	0.000000	0.000005
1	155	0.000000	0.000000	0.000005
1	156	0.000000	0.000000	0.000005
1	157	0.000000	0.000000	0.000000
1	158	0.000000	0.000000	0.003147
1	159	0.000000	0.000000	0.000001
1	16	0.000000	0.000000	0.000009
1	160	0.000000	0.000000	0.000001
1	161	0.000000	0.000000	0.000001
1	162	0.000000	0.000000	0.000006
1	163	0.000000	0.000000	0.000000
1	164	0.000000	0.000000	0.000020
1	165	0.000000	0.000000	0.000004
1	166	0.000000	0.000000	0.000797
1	167	0.000000	0.000000	0.000940
1	168	0.000000	0.000000	0.000992
1	169	0.000000	0.000000	0.000004
1	17	0.000000	0.000000	0.000006
1	170	0.000000	0.000000	0.000003
1	171	0.000000	0.000000	0.000010
1	172	0.000000	0.000000	0.000892
1	173	0.000000	0.000000	0.000020
1	174	0.000000	0.000000	0.000001
1	175	0.000000	0.000000	0.000017
1	176	0.000000	0.000000	0.000009
1	177	0.000005	0.047757	0.544262
1	178	0.000000	0.000000	0.000001
1	179	0.000000	0.000000	0.000000
1	18	0.000000	0.000000	0.000010
1	180	0.000000	0.000000	0.000000
1	181	0.000000	0.000000	0.000000
1	182	0.000000	0.000000	0.000000
1	183	0.000000	0.000000	0.000000
1	184	0.000000	0.000000	0.003016
1	185	0.000000	0.000000	0.002759
1	186	0.000000	0.000000	0.003141
1	187	0.000000	0.000000	0.003426
1	188	0.000000	0.000000	0.002588
1	189	0.000000	0.000009	0.098580
1	19	0.000000	0.000000	0.000001
1	190	0.000000	0.000000	0.001762
1	191	0.000000	0.000000	0.000001
1	192	0.000000	0.000000	0.000002
1	193	0.000000	0.000000	0.000138
1	194	0.000000	0.000000	0.000014
1	195	0.000000	0.000000	0.000974
1	196	0.000000	0.000000	0.000001
1	197	0.000000	0.000000	0.000754
1	198	0.000000	0.000000	0.000819
1	199	0.000000	0.000000	0.000001
1	2	0.000000	0.000066	0.145796
1	20	0.000000	0.000000	0.000000
1	200	0.000000	0.000000	0.000010
1	201	0.000000	0.000000	0.000009
1	202	0.000000	0.000000	0.000007
1	203	0.000000	0.000000	0.000005
1	204	0.000000	0.000000	0.000029
1	205	0.000000	0.000000	0.000002
1	206	0.000000	0.000000	0.000002
1	207	0.000000	0.000000	0.000002
1	208	0.000000	0.000000	0.000001
1	209	0.000000	0.000000	0.000023
1	21	0.000000	0.000000	0.000000
1	210	0.000000	0.000000	0.000004
1	211	0.000000	0.000000	0.000001
1	212	0.000000	0.000000	0.001644
1	213	0.000000	0.000000	0.000001
1	214	0.000000	0.000000	0.000002
1	215	0.000000	0.000000	0.001596
1	216	0.000000	0.000000	0.000002
1	217	0.000000	0.000000	0.000004
1	218	0.000000	0.000000	0.000003
1	219	0.000000	0.000000	0.000004
1	22	0.000000	0.000000	0.002546
1	220	0.000000	0.000000	0.000002
1	221	0.000000	0.000000	0.000001
1	222	0.000000	0.000000	0.000001
1	223	0.000000	0.000000	0.000001
1	224	0.000000	0.000000	0.000002
1	225	0.000000	0.000000	0.000001
1	226	0.000000	0.000000	0.013576
1	227	0.000000	0.000000	0.013860
1	228	0.000000	0.000000	0.001459
1	229	0.000000	0.000000	0.001634
1	23	0.000000	0.000000	0.001630
1	230	0.000000	0.000000	0.000000
1	231	0.000000	0.000000	0.000029
1	232	0.000000	0.000000	0.000001
1	233	0.000000	0.000000	0.000000
1	234	0.000000	0.000000	0.000016
1	235	0.000000	0.000000	0.000015
1	236	0.000000	0.000000	0.000001
1	237	0.000000	0.000000	0.011207
1	238	0.000000	0.000000	0.000003
1	239	0.000000	0.000000	0.000003
1	24	0.000000	0.000000	0.002080
1	240	0.000000	0.000000	0.000000
1	241	0.000000	0.000000	0.000000
1	242	0.000000	0.000000	0.000753
1	243	0.000000	0.000000	0.000649
1	244	0.000000	0.000000	0.000774
1	245	0.000000	0.000000	0.000001
1	246	0.000000	0.000000	0.000001
1	247	0.000000	0.000000	0.000001
1	248	0.000000	0.000000	0.000001
1	249	0.000000	0.000000	0.000001
1	25	0.000000	0.000000	0.002709
1	250	0.000000	0.000000	0.000002
1	251	0.000000	0.000000	0.000002
1	252	0.000000	0.000000	0.000002
1	253	0.000000	0.000000	0.000000
1	254	0.000000	0.000000	0.000001
1	255	0.000000	0.000000	0.001095
1	256	0.000000	0.000000	0.000005
1	257	0.000000	0.013075	0.420036
1	258	0.000000	0.000000	0.000001
1	259	0.000000	0.000000	0.000034
1	26	0.000000	0.000000	0.000766
1	260	0.000000	0.000000	0.000002
1	261	0.000000	0.000000	0.000001
1	262	0.000000	0.000000	0.000001
1	263	0.000000	0.000000	0.000001
1	264	0.000000	0.000000	0.034580
1	265	0.000000	0.000000	0.000002
1	266	0.000000	0.000000	0.000001
1	267	0.000000	0.000000	0.000001
1	268	0.000000	0.000000	0.000001
1	269	0.000000	0.000000	0.000002
1	27	0.000000	0.000000	0.000579
1	270	0.000000	0.000000	0.000004
1	271	0.000000	0.002651	0.305266
1	272	0.000000	0.000000	0.000035
1	273	0.000000	0.000000	0.000005
1	274	0.000000	0.000000	0.000001
1	275	0.000000	0.000000	0.001432
1	276	0.000000	0.000000	0.000003
1	277	0.000000	0.000000	0.000003
1	278	0.000000	0.000000	0.001197
1	279	0.000000	0.000000	0.000003
1	28	0.000000	0.000000	0.000137
1	280	0.000000	0.000000	0.000003
1	281	0.000000	0.000000	0.000001
1	282	0.000000	0.000000	0.000396
1	283	0.000000	0.000000	0.000007
1	284	0.000000	0.000000	0.000025
1	285	0.000000	0.000000	0.000001
1	286	0.000000	0.000000	0.000006
1	287	0.000000	0.000000	0.000005
1	288	0.000000	0.000000	0.000001
1	289	0.000000	0.000000	0.000001
1	29	0.000000	0.000000	0.000182
1	290	0.000000	0.000000	0.000001
1	291	0.000000	0.000000	0.000001
1	292	0.000000	0.000000	0.000001
1	293	0.000000	0.000000	0.000005
1	294	0.000000	0.000000	0.000004
1	295	0.000000	0.000000	0.000005
1	296	0.000000	0.000000	0.000930
1	297	0.000000	0.000000	0.000001
1	298	0.000000	0.000000	0.000001
1	299	0.000000	0.000000	0.000000
1	3	0.000000	0.000767	0.238188
1	30	0.000000	0.000000	0.000186
1	300	0.000000	0.000000	0.000000
1	301	0.000000	0.000000	0.000001
1	302	0.000000	0.000000	0.000004
1	303	0.000000	0.000000	0.000001
1	304	0.000000	0.000000	0.000007
1	305	0.000000	0.000000	0.000001
1	306	0.000000	0.000000	0.000000
1	307	0.000000	0.000000	0.000001
1	308	0.000000	0.000000	0.000001
1	309	0.000000	0.000000	0.000208
1	31	0.000000	0.000000	0.000262
1	310	0.000000	0.000000	0.000001
1	311	0.000000	0.000000	0.000001
1	312	0.000000	0.000000	0.000004
1	313	0.000000	0.000000	0.000003
1	314	0.000000	0.000000	0.010677
1	315	0.000000	0.000000	0.000003
1	316	0.000000	0.000000	0.000618
1	317	0.000000	0.000000	0.000001
1	318	0.000000	0.000000	0.000001
1	319	0.000000	0.000000	0.000427
1	32	0.000000	0.000000	0.000663
1	320	0.000000	0.000000	0.000000
1	321	0.000000	0.000000	0.000000
1	322	0.000000	0.000000	0.000000
1	323	0.000000	0.000000	0.000000
1	324	0.000000	0.000000	0.000000
1	325	0.000000	0.000000	0.000000
1	326	0.000000	0.000000	0.003570
1	327	0.000000	0.000000	0.000001
1	328	0.000000	0.000000	0.002090
1	329	0.000000	0.000000	0.000007
1	33	0.000000	0.000000	0.000278
1	330	0.000000	0.000000	0.000007
1	331	0.000000	0.000000	0.000000
1	332	0.000000	0.000000	0.000000
1	333	0.000000	0.000000	0.000001
1	334	0.000000	0.000000	0.000001
1	335	0.000000	0.000000	0.000002
1	336	0.000000	0.000000	0.000002
1	337	0.000000	0.000000	0.000002
1	338	0.000000	0.000000	0.000002
1	339	0.000000	0.000000	0.009548
1	34	0.000000	0.000000	0.000105
1	340	0.000000	0.000000	0.000036
1	341	0.000000	0.000000	0.000033
1	342	0.000000	0.000000	0.000005
1	343	0.000000	0.000030	0.124468
1	344	0.000000	0.000025	0.120207
1	345	0.000000	0.000000	0.000001
1	346	0.000000	0.000000	0.000010
1	347	0.000000	0.000000	0.000005
1	348	0.000000	0.000000	0.000001
1	349	0.000000	0.000000	0.000002
1	35	0.000000	0.000000	0.000149
1	350	0.000000	0.000000	0.000002
1	351	0.000000	0.000004	0.084841
1	352	0.000000	0.000000	0.000011
1	353	0.000000	0.000000	0.000011
1	354	0.000000	0.000000	0.001930
1	355	0.000000	0.000000	0.000002
1	356	0.000000	0.000000	0.002556
1	357	0.000000	0.000000	0.002365
1	358	0.000000	0.000000	0.000003
1	359	0.000000	0.000000	0.000002
1	36	0.000000	0.000000	0.000117
1	360	0.000000	0.000000	0.000010
1	361	0.000000	0.000000	0.000010
1	362	0.000000	0.000000	0.000000
1	363	0.000000	0.000000	0.002010
1	364	0.000000	0.000000	0.000007
1	365	0.000000	0.000000	0.000001
1	366	0.000000	0.000000	0.000306
1	367	0.000000	0.000000	0.003450
1	368	0.000000	0.000000	0.001848
1	369	0.000000	0.000000	0.000002
1	37	0.000000	0.000000	0.000093
1	370	0.000000	0.000000	0.000001
1	371	0.000000	0.000000	0.000004
1	372	0.000000	0.000000	0.000004
1	373	0.000000	0.000000	0.001252
1	374	0.000000	0.000000	0.012928
1	375	0.000000	0.000000	0.000003
1	376	0.000000	0.000001	0.065403
1	377	0.000000	0.000000	0.000002
1	378	0.000721	0.163844	0.696444
1	379	0.000000	0.000000	0.000000
1	38	0.000000	0.000000	0.000059
1	380	0.000000	0.000000	0.000004
1	381	0.000000	0.000000	0.000004
1	382	0.000000	0.000000	0.015961
1	383	0.000000	0.000002	0.074968
1	384	0.000000	0.000000	0.001754
1	385	0.000000	0.000000	0.000001
1	386	0.000000	0.000000	0.000001
1	387	0.000000	0.000000	0.000013
1	388	0.000000	0.001893	0.285373
1	389	0.000000	0.000000	0.000002
1	39	0.000000	0.000000	0.000056
1	390	0.000000	0.000000	0.000002
1	391	0.000000	0.000000	0.000002
1	392	0.000000	0.000000	0.000002
1	393	0.000000	0.000000	0.000002
1	394	0.000000	0.000000	0.000001
1	4	0.000000	0.001486	0.271882
1	40	0.000000	0.000000	0.000049
1	41	0.000000	0.000000	0.000037
1	42	0.000000	0.000000	0.000016
1	43	0.000000	0.000000	0.000017
1	44	0.000000	0.000000	0.000020
1	45	0.000000	0.000000	0.000009
1	46	0.000000	0.000000	0.000009
1	47	0.000000	0.000000	0.000005
1	48	0.000000	0.000000	0.000002
1	49	0.000000	0.000000	0.000003
1	5	0.000000	0.013188	0.420764
1	50	0.000000	0.000000	0.000003
1	51	0.000000	0.000000	0.000014
1	52	0.000000	0.000000	0.000012
1	53	0.000000	0.000000	0.000008
1	54	0.000000	0.000000	0.000003
1	55	0.000000	0.000000	0.000002
1	56	0.000000	0.000000	0.000005
1	57	0.000000	0.000000	0.000003
1	58	0.000000	0.000000	0.000006
1	59	0.000000	0.000000	0.000005
1	6	0.000103	0.100790	0.631951
1	60	0.000000	0.000000	0.000003
1	61	0.000000	0.000000	0.000002
1	62	0.000000	0.000000	0.000002
1	63	0.000000	0.000000	0.000001
1	64	0.000000	0.000000	0.000001
1	65	0.000000	0.000000	0.000003
1	66	0.000000	0.000000	0.000002
1	67	0.000000	0.000000	0.000002
1	68	0.000000	0.000000	0.000005
1	69	0.000000	0.000000	0.000004
1	7	0.000000	0.018936	0.452332
1	70	0.000000	0.000000	0.000003
1	71	0.000000	0.000000	0.000002
1	72	0.000000	0.000000	0.000002
1	73	0.000000	0.000000	0.000001
1	74	0.000000	0.000000	0.000000
1	75	0.000000	0.000000	0.000000
1	76	0.000000	0.000000	0.000000
1	77	0.000000	0.000000	0.000000
1	78	0.000000	0.000000	0.000001
1	79	0.000000	0.000000	0.000001
1	8	0.000000	0.000000	0.000072
1	80	0.000000	0.000000	0.000001
1	81	0.000000	0.000000	0.000001
1	82	0.000000	0.000000	0.000001
1	83	0.000000	0.000000	0.000000
1	84	0.000000	0.000000	0.000064
1	85	0.000000	0.000000	0.000025
1	86	0.000000	0.000000	0.000010
1	87	0.000000	0.000000	0.000005
1	88	0.000000	0.000000	0.000003
1	89	0.000000	0.000000	0.000002
1	9	0.000000	0.000000	0.000056
1	90	0.000000	0.000000	0.000002
1	91	0.000000	0.000000	0.000001
1	92	0.000000	0.000000	0.000001
1	93	0.000000	0.000000	0.000000
1	94	0.000000	0.000000	0.000000
1	95	0.000000	0.000000	0.000000
1	96	0.000000	0.000000	0.000000
1	97	0.000000	0.000000	0.000000
1	98	0.000000	0.000000	0.000000
1	99	0.000000	0.000000	0.000000
10	1	0.000000	0.000000	0.000044
10	100	0.000000	0.000000	0.000000
10	101	0.000000	0.000000	0.004878
10	102	0.000000	0.000006	0.090560
10	103	0.000000	0.000000	0.023423
10	104	0.000000	0.000000	0.012933
10	105	0.000000	0.000000	0.013519
10	106	0.000000	0.000000	0.017194
10	107	0.000000	0.000000	0.013351
10	108	0.000000	0.000000	0.011424
10	109	0.000000	0.000000	0.007854
10	11	0.121355	0.590221	0.899918
10	110	0.000000	0.000000	0.015469
10	111	0.000000	0.000000	0.011241
10	112	0.000000	0.000000	0.010470
10	113	0.000000	0.000000	0.021399
10	114	0.000000	0.000000	0.013885
10	115	0.000000	0.000003	0.078534
10	116	0.000000	0.000000	0.045401
10	117	0.000000	0.000003	0.077772
10	118	0.000000	0.000000	0.027039
10	119	0.000000	0.000000	0.021193
10	12	0.045214	0.461125	0.856572
10	120	0.000000	0.000000	0.006472
10	121	0.000000	0.000000	0.005184
10	122	0.000000	0.000000	0.004383
10	123	0.000000	0.000000	0.004123
10	124	0.000000	0.000000	0.007038
10	125	0.000005	0.048331	0.545563
10	126	0.000000	0.000000	0.007732
10	127	0.000000	0.000000	0.008881
10	128	0.000000	0.000000	0.031074
10	129	0.000000	0.000000	0.013762
10	13	0.000005	0.046966	0.542447
10	130	0.000000	0.000062	0.144217
10	131	0.000000	0.000000	0.001325
10	132	0.000000	0.000000	0.022120
10	133	0.000000	0.000000	0.003833
10	134	0.000000	0.000000	0.005481
10	135	0.000000	0.000000	0.007442
10	136	0.000000	0.000000	0.005997
10	137	0.000000	0.000004	0.081590
10	138	0.000000	0.000000	0.030108
10	139	0.000000	0.000000	0.001376
10	14	0.000000	0.019278	0.453954
10	140	0.000000	0.000001	0.059808
10	141	0.000000	0.000000	0.012756
10	142	0.000000	0.000000	0.008968
10	143	0.000000	0.000000	0.000816
10	144	0.000000	0.000000	0.012723
10	145	0.000000	0.000000	0.014553
10	146	0.000000	0.000000	0.027890
10	147	0.000000	0.000000	0.031151
10	148	0.000000	0.000000	0.023856
10	149	0.000000	0.000000	0.029576
10	15	0.000000	0.004546	0.340034
10	150	0.000000	0.000000	0.009841
10	151	0.000000	0.000001	0.055046
10	152	0.000000	0.000000	0.026565
10	153	0.000000	0.000052	0.138976
10	154	0.000000	0.000008	0.094628
10	155	0.000000	0.000030	0.124499
10	156	0.000000	0.000018	0.111915
10	157	0.000000	0.000000	0.000922
10	158	0.000000	0.000000	0.012610
10	159	0.000000	0.000000	0.018384
10	16	0.000000	0.000646	0.230172
10	160	0.000000	0.000000	0.019920
10	161	0.000000	0.000000	0.011672
10	162	0.000000	0.000000	0.048124
10	163	0.000000	0.000000	0.003061
10	164	0.000000	0.022291	0.467331
10	165	0.000000	0.000000	0.039245
10	166	0.000000	0.000000	0.020145
10	167	0.000000	0.000000	0.016306
10	168	0.000000	0.000000	0.019138
10	169	0.000000	0.000000	0.035321
10	17	0.000000	0.000019	0.113696
10	170	0.000000	0.000000	0.027697
10	171	0.000000	0.000054	0.140064
10	172	0.000000	0.000000	0.048225
10	173	0.000000	0.000046	0.135699
10	174	0.000000	0.000000	0.006207
10	175	0.000000	0.000021	0.116433
10	176	0.000000	0.000000	0.041649
10	177	0.000000	0.000000	0.000044
10	178	0.000000	0.000000	0.003139
10	179	0.000000	0.000000	0.007015
10	18	0.000000	0.001402	0.268745
10	180	0.000000	0.000000	0.009730
10	181	0.000000	0.000000	0.007845
10	182	0.000000	0.000000	0.007654
10	183	0.000000	0.000000	0.004174
10	184	0.000000	0.000000	0.006307
10	185	0.000000	0.000000	0.016132
10	186	0.000000	0.000000	0.008057
10	187	0.000000	0.000000	0.007225
10	188	0.000000	0.000000	0.007127
10	189	0.000000	0.000000	0.000574
10	19	0.000000	0.000000	0.021856
10	190	0.000000	0.000000	0.017418
10	191	0.000000	0.000000	0.004416
10	192	0.000000	0.000000	0.011942
10	193	0.000000	0.003150	0.315982
10	194	0.000000	0.000007	0.091774
10	195	0.000000	0.000000	0.043414
10	196	0.000000	0.000000	0.004864
10	197	0.000000	0.000001	0.061788
10	198	0.000000	0.000001	0.056487
10	199	0.000000	0.000000	0.007121
10	2	0.000000	0.000000	0.000042
10	20	0.000000	0.000000	0.003551
10	200	0.000000	0.000005	0.087274
10	201	0.000000	0.000000	0.051249
10	202	0.000000	0.000000	0.049347
10	203	0.000000	0.000000	0.053590
10	204	0.000000	0.007029	0.371004
10	205	0.000000	0.000001	0.059622
10	206	0.000000	0.000001	0.057885
10	207	0.000000	0.000000	0.054477
10	208	0.000000	0.000000	0.005837
10	209	0.000000	0.001717	0.279868
10	21	0.000000	0.000000	0.000898
10	210	0.000000	0.000008	0.095911
10	211	0.000000	0.000000	0.005636
10	212	0.000000	0.000000	0.010974
10	213	0.000000	0.000000	0.017696
10	214	0.000000	0.000000	0.027569
10	215	0.000000	0.000000	0.026088
10	216	0.000000	0.000000	0.005795
10	217	0.000000	0.000000	0.009398
10	218	0.000000	0.000000	0.007140
10	219	0.000000	0.000000	0.009495
10	22	0.000000	0.000000	0.020641
10	220	0.000000	0.000000	0.039590
10	221	0.000000	0.000000	0.023595
10	222	0.000000	0.000000	0.016476
10	223	0.000000	0.000000	0.018642
10	224	0.000000	0.000000	0.001333
10	225	0.000000	0.000000	0.006671
10	226	0.000000	0.000000	0.000288
10	227	0.000000	0.000000	0.000311
10	228	0.000000	0.000000	0.030071
10	229	0.000000	0.000000	0.028346
10	23	0.000000	0.000000	0.039605
10	230	0.000000	0.000000	0.007887
10	231	0.005282	0.269585	0.769377
10	232	0.000000	0.000000	0.013219
10	233	0.000000	0.000000	0.007766
10	234	0.000000	0.000025	0.120588
10	235	0.000000	0.000040	0.131807
10	236	0.000000	0.000000	0.008695
10	237	0.000000	0.000000	0.001106
10	238	0.000000	0.000000	0.031353
10	239	0.000000	0.000000	0.032885
10	24	0.000000	0.000000	0.021172
10	240	0.000000	0.000000	0.010689
10	241	0.000000	0.000000	0.012416
10	242	0.000000	0.000001	0.064011
10	243	0.000000	0.000002	0.070653
10	244	0.000000	0.000000	0.051808
10	245	0.000000	0.000000	0.017535
10	246	0.000000	0.000000	0.014525
10	247	0.000000	0.000000	0.021859
10	248	0.000000	0.000000	0.021921
10	249	0.000000	0.000000	0.018251
10	25	0.000000	0.000000	0.018028
10	250	0.000000	0.000000	0.030249
10	251	0.000000	0.000000	0.028352
10	252	0.000000	0.000000	0.027312
10	253	0.000000	0.000000	0.000000
10	254	0.000000	0.000000	0.020902
10	255	0.000000	0.000000	0.037935
10	256	0.000000	0.000034	0.128104
10	257	0.000000	0.000000	0.000101
10	258	0.000000	0.000000	0.001428
10	259	0.000000	0.000012	0.103650
10	26	0.000000	0.000001	0.061075
10	260	0.000000	0.000000	0.048644
10	261	0.000000	0.000000	0.012703
10	262	0.000000	0.000000	0.012353
10	263	0.000000	0.000000	0.006592
10	264	0.000000	0.000000	0.001146
10	265	0.000000	0.000000	0.049096
10	266	0.000000	0.000000	0.015706
10	267	0.000000	0.000000	0.015028
10	268	0.000000	0.000000	0.022557
10	269	0.000000	0.000000	0.024992
10	27	0.000000	0.000005	0.086163
10	270	0.000000	0.000000	0.022044
10	271	0.000000	0.000000	0.000129
10	272	0.000000	0.001828	0.283399
10	273	0.000000	0.000000	0.013474
10	274	0.000000	0.000000	0.001960
10	275	0.000000	0.000000	0.031754
10	276	0.000000	0.000001	0.065622
10	277	0.000000	0.000001	0.057078
10	278	0.000000	0.000000	0.035251
10	279	0.000000	0.000002	0.068442
10	28	0.000000	0.010007	0.398164
10	280	0.000000	0.000001	0.065065
10	281	0.000000	0.000000	0.014439
10	282	0.000000	0.000023	0.118259
10	283	0.000000	0.000144	0.170396
10	284	0.000121	0.104916	0.637042
10	285	0.000000	0.000000	0.010804
10	286	0.000000	0.000000	0.026724
10	287	0.000000	0.000000	0.021729
10	288	0.000000	0.000000	0.009822
10	289	0.000000	0.000000	0.010786
10	29	0.000000	0.001958	0.287327
10	290	0.000000	0.000000	0.007428
10	291	0.000000	0.000000	0.007536
10	292	0.000000	0.000000	0.008030
10	293	0.000000	0.000026	0.121000
10	294	0.000000	0.000019	0.113957
10	295	0.000000	0.000026	0.120833
10	296	0.000000	0.000000	0.050872
10	297	0.000000	0.000000	0.019461
10	298	0.000000	0.000000	0.021291
10	299	0.000000	0.000000	0.009655
10	3	0.000000	0.000000	0.000057
10	30	0.000000	0.001033	0.252801
10	300	0.000000	0.000000	0.008104
10	301	0.000000	0.000000	0.004591
10	302	0.000000	0.000016	0.109388
10	303	0.000000	0.000000	0.005731
10	304	0.000000	0.000000	0.029858
10	305	0.000000	0.000000	0.003453
10	306	0.000000	0.000000	0.009286
10	307	0.000000	0.000000	0.014757
10	308	0.000000	0.000000	0.014884
10	309	0.000000	0.000522	0.220602
10	31	0.000000	0.000066	0.145853
10	310	0.000000	0.000000	0.014684
10	311	0.000000	0.000000	0.015943
10	312	0.000000	0.000000	0.007040
10	313	0.000000	0.000000	0.018122
10	314	0.000000	0.000000	0.000900
10	315	0.000000	0.000000	0.006230
10	316	0.000000	0.000002	0.068587
10	317	0.000000	0.000000	0.025258
10	318	0.000000	0.000000	0.029553
10	319	0.000000	0.000015	0.109159
10	32	0.000000	0.000304	0.197954
10	320	0.000000	0.000000	0.007028
10	321	0.000000	0.000000	0.007415
10	322	0.000000	0.000000	0.007355
10	323	0.000000	0.000000	0.008731
10	324	0.000000	0.000000	0.006143
10	325	0.000000	0.000000	0.008887
10	326	0.000000	0.000000	0.004610
10	327	0.000000	0.000000	0.015858
10	328	0.000000	0.000000	0.016136
10	329	0.000000	0.000000	0.023724
10	33	0.000000	0.000001	0.062378
10	330	0.000000	0.000000	0.026112
10	331	0.000000	0.000000	0.000000
10	332	0.000000	0.000000	0.000000
10	333	0.000000	0.000000	0.018319
10	334	0.000000	0.000000	0.004227
10	335	0.000000	0.000000	0.005569
10	336	0.000000	0.000000	0.005622
10	337	0.000000	0.000000	0.006195
10	338	0.000000	0.000000	0.004354
10	339	0.000000	0.000000	0.001186
10	34	0.000000	0.000080	0.151498
10	340	0.000000	0.008305	0.383590
10	341	0.000000	0.007580	0.376645
10	342	0.000000	0.000000	0.043044
10	343	0.000000	0.000000	0.000362
10	344	0.000000	0.000000	0.000374
10	345	0.000000	0.000000	0.017124
10	346	0.000000	0.000001	0.067140
10	347	0.000000	0.000000	0.032586
10	348	0.000000	0.000000	0.008209
10	349	0.000000	0.000000	0.020788
10	35	0.000000	0.000028	0.122657
10	350	0.000000	0.000000	0.018532
10	351	0.000000	0.000000	0.000424
10	352	0.000000	0.000000	0.030963
10	353	0.000000	0.000000	0.032481
10	354	0.000000	0.000000	0.024332
10	355	0.000000	0.000000	0.010701
10	356	0.000000	0.000000	0.013258
10	357	0.000000	0.000000	0.014350
10	358	0.000000	0.000000	0.021474
10	359	0.000000	0.000000	0.004334
10	36	0.000000	0.001205	0.260746
10	360	0.000000	0.000984	0.250392
10	361	0.000000	0.000505	0.219089
10	362	0.000000	0.000000	0.000000
10	363	0.000000	0.000000	0.020733
10	364	0.000000	0.000001	0.056372
10	365	0.000000	0.000000	0.010118
10	366	0.000000	0.000074	0.149081
10	367	0.000000	0.000000	0.007843
10	368	0.000000	0.000000	0.015583
10	369	0.000000	0.000000	0.033751
10	37	0.000000	0.000003	0.080605
10	370	0.000000	0.000000	0.016865
10	371	0.000000	0.000000	0.017693
10	372	0.000000	0.000000	0.017310
10	373	0.000000	0.000000	0.035924
10	374	0.000000	0.000000	0.000809
10	375	0.000000	0.000000	0.051021
10	376	0.000000	0.000000	0.000329
10	377	0.000000	0.000000	0.027884
10	378	0.000000	0.000000	0.000038
10	379	0.000000	0.000000	0.003412
10	38	0.000000	0.000003	0.077080
10	380	0.000000	0.000000	0.052451
10	381	0.000000	0.000001	0.055961
10	382	0.000000	0.000000	0.000285
10	383	0.000000	0.000000	0.000593
10	384	0.000000	0.000000	0.016277
10	385	0.000000	0.000000	0.003470
10	386	0.000000	0.000000	0.001107
10	387	0.000000	0.000001	0.059302
10	388	0.000000	0.000000	0.000159
10	389	0.000000	0.000000	0.052280
10	39	0.000000	0.000001	0.064898
10	390	0.000000	0.000000	0.034794
10	391	0.000000	0.000000	0.051962
10	392	0.000000	0.000000	0.044555
10	393	0.000000	0.000000	0.052199
10	394	0.000000	0.000000	0.036478
10	4	0.000000	0.000000	0.000100
10	40	0.000000	0.000004	0.082464
10	41	0.000000	0.000010	0.099898
10	42	0.000000	0.000122	0.164932
10	43	0.000000	0.000019	0.113442
10	44	0.000000	0.000006	0.090674
10	45	0.000000	0.000003	0.076658
10	46	0.000000	0.000027	0.121848
10	47	0.000000	0.000000	0.050209
10	48	0.000000	0.000000	0.022857
10	49	0.000000	0.000000	0.032280
10	5	0.000000	0.000000	0.000080
10	50	0.000000	0.000000	0.026879
10	51	0.000000	0.000000	0.040818
10	52	0.000000	0.000000	0.042029
10	53	0.000000	0.000000	0.044243
10	54	0.000000	0.000000	0.019015
10	55	0.000000	0.000000	0.015741
10	56	0.000000	0.000000	0.020700
10	57	0.000000	0.000000	0.013948
10	58	0.000000	0.000000	0.015584
10	59	0.000000	0.000000	0.015147
10	6	0.000000	0.000000	0.000088
10	60	0.000000	0.000000	0.008027
10	61	0.000000	0.000000	0.007337
10	62	0.000000	0.000000	0.007214
10	63	0.000000	0.000000	0.004776
10	64	0.000000	0.000000	0.004653
10	65	0.000000	0.000002	0.069697
10	66	0.000000	0.000000	0.052260
10	67	0.000000	0.000000	0.044725
10	68	0.000000	0.000030	0.124681
10	69	0.000000	0.000007	0.093004
10	7	0.000000	0.000000	0.000126
10	70	0.000000	0.000001	0.061031
10	71	0.000000	0.000000	0.048498
10	72	0.000000	0.000000	0.041135
10	73	0.000000	0.000000	0.017260
10	74	0.000000	0.000000	0.010016
10	75	0.000000	0.000000	0.005653
10	76	0.000000	0.000000	0.004869
10	77	0.000000	0.000000	0.009641
10	78	0.000000	0.000000	0.012127
10	79	0.000000	0.000000	0.013437
10	8	0.000697	0.162505	0.695302
10	80	0.000000	0.000000	0.020570
10	81	0.000000	0.000000	0.015928
10	82	0.000000	0.000000	0.010653
10	83	0.000000	0.000000	0.004758
10	84	0.000000	0.000000	0.002681
10	85	0.000000	0.000000	0.002102
10	86	0.000000	0.000000	0.001800
10	87	0.000000	0.000000	0.002395
10	88	0.000000	0.000000	0.001542
10	89	0.000000	0.000000	0.002139
10	9	0.231048	0.693307	0.929362
10	90	0.000000	0.000000	0.003217
10	91	0.000000	0.000000	0.002960
10	92	0.000000	0.000000	0.000104
10	93	0.000000	0.000000	0.000022
10	94	0.000000	0.000000	0.000026
10	95	0.000000	0.000000	0.000012
10	96	0.000000	0.000000	0.000000
10	97	0.000000	0.000000	0.000000
10	98	0.000000	0.000000	0.000000
10	99	0.000000	0.000000	0.000000
100	1	0.000000	0.000000	0.000000
100	10	0.000000	0.000000	0.000000
100	101	0.000000	0.000000	0.000003
100	102	0.000000	0.000000	0.000001
100	103	0.000000	0.000000	0.000003
100	104	0.000000	0.000000	0.000001
100	105	0.000000	0.000000	0.000001
100	106	0.000000	0.000000	0.000006
100	107	0.000000	0.000000	0.000000
100	108	0.000000	0.000000	0.000000
100	109	0.000000	0.000000	0.000000
100	11	0.000000	0.000000	0.000000
100	110	0.000000	0.000000	0.000000
100	111	0.000000	0.000000	0.000001
100	112	0.000000	0.000000	0.000001
100	113	0.000000	0.000000	0.000000
100	114	0.000000	0.000000	0.000000
100	115	0.000000	0.000000	0.000000
100	116	0.000000	0.000000	0.000000
100	117	0.000000	0.000000	0.000001
100	118	0.000000	0.000000	0.000000
100	119	0.000000	0.000000	0.000000
100	12	0.000000	0.000000	0.000000
100	120	0.000000	0.000000	0.000004
100	121	0.000000	0.000000	0.000002
100	122	0.000000	0.000000	0.000003
100	123	0.000000	0.000000	0.000003
100	124	0.000000	0.000000	0.000001
100	125	0.000000	0.000000	0.000000
100	126	0.000000	0.000000	0.000000
100	127	0.000000	0.000000	0.000000
100	128	0.000000	0.000000	0.000000
100	129	0.000000	0.000000	0.000000
100	13	0.000000	0.000000	0.000000
100	130	0.000000	0.000000	0.000000
100	131	0.000000	0.000000	0.000020
100	132	0.000000	0.000000	0.000004
100	133	0.000000	0.000000	0.000000
100	134	0.000000	0.000000	0.000000
100	135	0.000000	0.000000	0.000000
100	136	0.000000	0.000000	0.000000
100	137	0.000000	0.000000	0.000001
100	138	0.000000	0.000000	0.000002
100	139	0.000000	0.000000	0.000024
100	14	0.000000	0.000000	0.000000
100	140	0.000000	0.000000	0.000000
100	141	0.000000	0.000000	0.000002
100	142	0.000000	0.000000	0.000001
100	143	0.000000	0.000000	0.000001
100	144	0.000000	0.000000	0.000000
100	145	0.000000	0.000000	0.000000
100	146	0.000000	0.000000	0.000000
100	147	0.000000	0.000000	0.000000
100	148	0.000000	0.000000	0.000000
100	149	0.000000	0.000000	0.000000
100	15	0.000000	0.000000	0.000000
100	150	0.000000	0.000000	0.000000
100	151	0.000000	0.000000	0.000001
100	152	0.000000	0.000000	0.000002
100	153	0.000000	0.000000	0.000000
100	154	0.000000	0.000000	0.000000
100	155	0.000000	0.000000	0.000000
100	156	0.000000	0.000000	0.000000
100	157	0.000000	0.000000	0.000016
100	158	0.000000	0.000000	0.000000
100	159	0.000000	0.000000	0.000000
100	16	0.000000	0.000000	0.000000
100	160	0.000000	0.000000	0.000000
100	161	0.000000	0.000000	0.000000
100	162	0.000000	0.000000	0.000001
100	163	0.000000	0.000000	0.000001
100	164	0.000000	0.000000	0.000000
100	165	0.000000	0.000000	0.000001
100	166	0.000000	0.000000	0.000000
100	167	0.000000	0.000000	0.000000
100	168	0.000000	0.000000	0.000000
100	169	0.000000	0.000000	0.000001
100	17	0.000000	0.000000	0.000000
100	170	0.000000	0.000000	0.000001
100	171	0.000000	0.000000	0.000000
100	172	0.000000	0.000000	0.000000
100	173	0.000000	0.000000	0.000001
100	174	0.000000	0.000000	0.000002
100	175	0.000000	0.000000	0.000001
100	176	0.000000	0.000000	0.000002
100	177	0.000000	0.000000	0.000000
100	178	0.000000	0.000000	0.000010
100	179	0.000000	0.000000	0.000000
100	18	0.000000	0.000000	0.000000
100	180	0.000000	0.000000	0.000000
100	181	0.000000	0.000000	0.000000
100	182	0.000000	0.000000	0.000000
100	183	0.000000	0.000000	0.000001
100	184	0.000000	0.000000	0.000000
100	185	0.000000	0.000000	0.000000
100	186	0.000000	0.000000	0.000000
100	187	0.000000	0.000000	0.000000
100	188	0.000000	0.000000	0.000000
100	189	0.000000	0.000000	0.000000
100	19	0.000000	0.000000	0.000000
100	190	0.000000	0.000000	0.000000
100	191	0.000000	0.000000	0.000004
100	192	0.000000	0.000000	0.000004
100	193	0.000000	0.000000	0.000000
100	194	0.000000	0.000000	0.000001
100	195	0.000000	0.000000	0.000000
100	196	0.000000	0.000000	0.000005
100	197	0.000000	0.000000	0.000000
100	198	0.000000	0.000000	0.000000
100	199	0.000000	0.000000	0.000001
100	2	0.000000	0.000000	0.000000
100	20	0.000000	0.000000	0.000000
100	200	0.000000	0.000000	0.000001
100	201	0.000000	0.000000	0.000001
100	202	0.000000	0.000000	0.000001
100	203	0.000000	0.000000	0.000001
100	204	0.000000	0.000000	0.000000
100	205	0.000000	0.000000	0.000000
100	206	0.000000	0.000000	0.000000
100	207	0.000000	0.000000	0.000000
100	208	0.000000	0.000000	0.000001
100	209	0.000000	0.000000	0.000000
100	21	0.000000	0.000000	0.000000
100	210	0.000000	0.000000	0.000000
100	211	0.000000	0.000000	0.000003
100	212	0.000000	0.000000	0.000000
100	213	0.000000	0.000000	0.000000
100	214	0.000000	0.000000	0.000001
100	215	0.000000	0.000000	0.000000
100	216	0.000000	0.000000	0.000008
100	217	0.000000	0.000000	0.000006
100	218	0.000000	0.000000	0.000007
100	219	0.000000	0.000000	0.000006
100	22	0.000000	0.000000	0.000000
100	220	0.000000	0.000000	0.000000
100	221	0.000000	0.000000	0.000000
100	222	0.000000	0.000000	0.000000
100	223	0.000000	0.000000	0.000000
100	224	0.000000	0.000000	0.000039
100	225	0.000000	0.000000	0.000001
100	226	0.000000	0.000000	0.000000
100	227	0.000000	0.000000	0.000000
100	228	0.000000	0.000000	0.000000
100	229	0.000000	0.000000	0.000000
100	23	0.000000	0.000000	0.000000
100	230	0.000000	0.000000	0.000000
100	231	0.000000	0.000000	0.000000
100	232	0.000000	0.000000	0.000001
100	233	0.000000	0.000000	0.000000
100	234	0.000000	0.000000	0.000001
100	235	0.000000	0.000000	0.000001
100	236	0.000000	0.000000	0.000002
100	237	0.000000	0.000000	0.000000
100	238	0.000000	0.000000	0.000001
100	239	0.000000	0.000000	0.000001
100	24	0.000000	0.000000	0.000000
100	240	0.000000	0.000000	0.000000
100	241	0.000000	0.000000	0.000000
100	242	0.000000	0.000000	0.000000
100	243	0.000000	0.000000	0.000000
100	244	0.000000	0.000000	0.000000
100	245	0.000000	0.000000	0.000000
100	246	0.000000	0.000000	0.000000
100	247	0.000000	0.000000	0.000000
100	248	0.000000	0.000000	0.000000
100	249	0.000000	0.000000	0.000000
100	25	0.000000	0.000000	0.000000
100	250	0.000000	0.000000	0.000001
100	251	0.000000	0.000000	0.000001
100	252	0.000000	0.000000	0.000001
100	253	0.000000	0.022991	0.470229
100	254	0.000000	0.000000	0.000000
100	255	0.000000	0.000000	0.000000
100	256	0.000000	0.000000	0.000000
100	257	0.000000	0.000000	0.000000
100	258	0.000000	0.000000	0.000013
100	259	0.000000	0.000000	0.000001
100	26	0.000000	0.000000	0.000000
100	260	0.000000	0.000000	0.000000
100	261	0.000000	0.000000	0.000001
100	262	0.000000	0.000000	0.000001
100	263	0.000000	0.000000	0.000001
100	264	0.000000	0.000000	0.000000
100	265	0.000000	0.000000	0.000000
100	266	0.000000	0.000000	0.000000
100	267	0.000000	0.000000	0.000000
100	268	0.000000	0.000000	0.000000
100	269	0.000000	0.000000	0.000001
100	27	0.000000	0.000000	0.000000
100	270	0.000000	0.000000	0.000002
100	271	0.000000	0.000000	0.000000
100	272	0.000000	0.000000	0.000000
100	273	0.000000	0.000000	0.000005
100	274	0.000000	0.000000	0.000007
100	275	0.000000	0.000000	0.000000
100	276	0.000000	0.000000	0.000000
100	277	0.000000	0.000000	0.000000
100	278	0.000000	0.000000	0.000000
100	279	0.000000	0.000000	0.000000
100	28	0.000000	0.000000	0.000000
100	280	0.000000	0.000000	0.000000
100	281	0.000000	0.000000	0.000000
100	282	0.000000	0.000000	0.000000
100	283	0.000000	0.000000	0.000000
100	284	0.000000	0.000000	0.000000
100	285	0.000000	0.000000	0.000001
100	286	0.000000	0.000000	0.000002
100	287	0.000000	0.000000	0.000002
100	288	0.000000	0.000000	0.000001
100	289	0.000000	0.000000	0.000001
100	29	0.000000	0.000000	0.000000
100	290	0.000000	0.000000	0.000003
100	291	0.000000	0.000000	0.000001
100	292	0.000000	0.000000	0.000001
100	293	0.000000	0.000000	0.000000
100	294	0.000000	0.000000	0.000000
100	295	0.000000	0.000000	0.000000
100	296	0.000000	0.000000	0.000000
100	297	0.000000	0.000000	0.000000
100	298	0.000000	0.000000	0.000000
100	299	0.000000	0.000000	0.000000
100	3	0.000000	0.000000	0.000000
100	30	0.000000	0.000000	0.000000
100	300	0.000000	0.000000	0.000000
100	301	0.000000	0.000000	0.000002
100	302	0.000000	0.000000	0.000000
100	303	0.000000	0.000000	0.000004
100	304	0.000000	0.000000	0.000002
100	305	0.000000	0.000000	0.000010
100	306	0.000000	0.000000	0.000000
100	307	0.000000	0.000000	0.000000
100	308	0.000000	0.000000	0.000000
100	309	0.000000	0.000000	0.000000
100	31	0.000000	0.000000	0.000000
100	310	0.000000	0.000000	0.000000
100	311	0.000000	0.000000	0.000000
100	312	0.000000	0.000000	0.000008
100	313	0.000000	0.000000	0.000003
100	314	0.000000	0.000000	0.000000
100	315	0.000000	0.000000	0.000009
100	316	0.000000	0.000000	0.000000
100	317	0.000000	0.000000	0.000000
100	318	0.000000	0.000000	0.000000
100	319	0.000000	0.000000	0.000000
100	32	0.000000	0.000000	0.000001
100	320	0.000000	0.000000	0.000000
100	321	0.000000	0.000000	0.000000
100	322	0.000000	0.000000	0.000000
100	323	0.000000	0.000000	0.000000
100	324	0.000000	0.000000	0.000000
100	325	0.000000	0.000000	0.000000
100	326	0.000000	0.000000	0.000001
100	327	0.000000	0.000000	0.000001
100	328	0.000000	0.000000	0.000000
100	329	0.000000	0.000000	0.000003
100	33	0.000000	0.000000	0.000001
100	330	0.000000	0.000000	0.000002
100	331	0.000000	0.014480	0.428698
100	332	0.000000	0.018195	0.448733
100	333	0.000000	0.000000	0.000000
100	334	0.000000	0.000000	0.000009
100	335	0.000000	0.000000	0.000006
100	336	0.000000	0.000000	0.000006
100	337	0.000000	0.000000	0.000006
100	338	0.000000	0.000000	0.000008
100	339	0.000000	0.000000	0.000001
100	34	0.000000	0.000000	0.000001
100	340	0.000000	0.000000	0.000000
100	341	0.000000	0.000000	0.000000
100	342	0.000000	0.000000	0.000001
100	343	0.000000	0.000000	0.000000
100	344	0.000000	0.000000	0.000000
100	345	0.000000	0.000000	0.000000
100	346	0.000000	0.000000	0.000001
100	347	0.000000	0.000000	0.000001
100	348	0.000000	0.000000	0.000001
100	349	0.000000	0.000000	0.000002
100	35	0.000000	0.000000	0.000001
100	350	0.000000	0.000000	0.000001
100	351	0.000000	0.000000	0.000000
100	352	0.000000	0.000000	0.000003
100	353	0.000000	0.000000	0.000002
100	354	0.000000	0.000000	0.000000
100	355	0.000000	0.000000	0.000003
100	356	0.000000	0.000000	0.000000
100	357	0.000000	0.000000	0.000000
100	358	0.000000	0.000000	0.000002
100	359	0.000000	0.000000	0.000011
100	36	0.000000	0.000000	0.000001
100	360	0.000000	0.000000	0.000000
100	361	0.000000	0.000000	0.000000
100	362	0.000006	0.048643	0.546266
100	363	0.000000	0.000000	0.000000
100	364	0.000000	0.000000	0.000001
100	365	0.000000	0.000000	0.000001
100	366	0.000000	0.000000	0.000000
100	367	0.000000	0.000000	0.000000
100	368	0.000000	0.000000	0.000000
100	369	0.000000	0.000000	0.000000
100	37	0.000000	0.000000	0.000001
100	370	0.000000	0.000000	0.000000
100	371	0.000000	0.000000	0.000002
100	372	0.000000	0.000000	0.000002
100	373	0.000000	0.000000	0.000000
100	374	0.000000	0.000000	0.000000
100	375	0.000000	0.000000	0.000000
100	376	0.000000	0.000000	0.000000
100	377	0.000000	0.000000	0.000000
100	378	0.000000	0.000000	0.000000
100	379	0.000000	0.000000	0.000001
100	38	0.000000	0.000000	0.000001
100	380	0.000000	0.000000	0.000001
100	381	0.000000	0.000000	0.000001
100	382	0.000000	0.000000	0.000000
100	383	0.000000	0.000000	0.000000
100	384	0.000000	0.000000	0.000000
100	385	0.000000	0.000000	0.000010
100	386	0.000000	0.000000	0.000024
100	387	0.000000	0.000000	0.000002
100	388	0.000000	0.000000	0.000000
100	389	0.000000	0.000000	0.000000
100	39	0.000000	0.000000	0.000002
100	390	0.000000	0.000000	0.000000
100	391	0.000000	0.000000	0.000000
100	392	0.000000	0.000000	0.000000
100	393	0.000000	0.000000	0.000000
100	394	0.000000	0.000000	0.000000
100	4	0.000000	0.000000	0.000000
100	40	0.000000	0.000000	0.000001
100	41	0.000000	0.000000	0.000001
100	42	0.000000	0.000000	0.000000
100	43	0.000000	0.000000	0.000001
100	44	0.000000	0.000000	0.000001
100	45	0.000000	0.000000	0.000001
100	46	0.000000	0.000000	0.000001
100	47	0.000000	0.000000	0.000001
100	48	0.000000	0.000000	0.000001
100	49	0.000000	0.000000	0.000001
100	5	0.000000	0.000000	0.000000
100	50	0.000000	0.000000	0.000001
100	51	0.000000	0.000000	0.000002
100	52	0.000000	0.000000	0.000003
100	53	0.000000	0.000000	0.000002
100	54	0.000000	0.000000	0.000002
100	55	0.000000	0.000000	0.000003
100	56	0.000000	0.000000	0.000003
100	57	0.000000	0.000000	0.000003
100	58	0.000000	0.000000	0.000004
100	59	0.000000	0.000000	0.000004
100	6	0.000000	0.000000	0.000000
100	60	0.000000	0.000000	0.000006
100	61	0.000000	0.000000	0.000005
100	62	0.000000	0.000000	0.000005
100	63	0.000000	0.000000	0.000006
100	64	0.000000	0.000000	0.000003
100	65	0.000000	0.000000	0.000000
100	66	0.000000	0.000000	0.000000
100	67	0.000000	0.000000	0.000000
100	68	0.000000	0.000000	0.000000
100	69	0.000000	0.000000	0.000000
100	7	0.000000	0.000000	0.000000
100	70	0.000000	0.000000	0.000000
100	71	0.000000	0.000000	0.000000
100	72	0.000000	0.000000	0.000000
100	73	0.000000	0.000000	0.000000
100	74	0.000000	0.000000	0.000000
100	75	0.000000	0.000000	0.000000
100	76	0.000000	0.000000	0.000000
100	77	0.000000	0.000000	0.000000
100	78	0.000000	0.000000	0.000000
100	79	0.000000	0.000000	0.000000
100	8	0.000000	0.000000	0.000000
100	80	0.000000	0.000000	0.000000
100	81	0.000000	0.000000	0.000000
100	82	0.000000	0.000000	0.000000
100	83	0.000000	0.000000	0.000001
100	84	0.000000	0.000000	0.000035
100	85	0.000000	0.000000	0.000047
100	86	0.000000	0.000000	0.000063
100	87	0.000000	0.000000	0.000039
100	88	0.000000	0.000000	0.000052
100	89	0.000000	0.000000	0.000032
100	9	0.000000	0.000000	0.000000
100	90	0.000000	0.000000	0.000026
100	91	0.000000	0.000000	0.000015
100	92	0.000000	0.000000	0.000820
100	93	0.000000	0.000000	0.001404
100	94	0.000000	0.000000	0.001490
100	95	0.000000	0.000000	0.005762
100	96	0.000000	0.000000	0.025377
100	97	0.000000	0.012248	0.414582
100	98	0.000000	0.020589	0.459966
100	99	0.000000	0.010893	0.404976
101	1	0.000000	0.000000	0.000001
101	10	0.000000	0.000000	0.004878
101	100	0.000000	0.000000	0.000003
101	102	0.000000	0.000000	0.052887
101	103	0.000000	0.000018	0.112692
101	104	0.000000	0.000283	0.195079
101	105	0.000000	0.000540	0.222071
101	106	0.000000	0.002757	0.307672
101	107	0.000000	0.000021	0.116211
101	108	0.000000	0.000066	0.145997
101	109	0.000000	0.000072	0.148215
101	11	0.000000	0.000000	0.005766
101	110	0.000000	0.000000	0.000080
101	111	0.000000	0.003328	0.319475
101	112	0.000000	0.001637	0.277216
101	113	0.000000	0.000000	0.005782
101	114	0.000000	0.000000	0.015052
101	115	0.000000	0.000000	0.000613
101	116	0.000000	0.000000	0.000698
101	117	0.000000	0.000001	0.061988
101	118	0.000000	0.000000	0.031804
101	119	0.000000	0.000000	0.023386
101	12	0.000000	0.000000	0.007338
101	120	0.000125	0.105737	0.638036
101	121	0.000239	0.124399	0.659119
101	122	0.362260	0.775810	0.950498
101	123	0.540471	0.857419	0.969703
101	124	0.000000	0.000996	0.251010
101	125	0.000000	0.000000	0.009456
101	126	0.000000	0.000000	0.034282
101	127	0.000000	0.000000	0.035292
101	128	0.000000	0.000007	0.093552
101	129	0.000000	0.000000	0.006140
101	13	0.000000	0.000000	0.005114
101	130	0.000000	0.000000	0.005568
101	131	0.000000	0.000157	0.173368
101	132	0.000000	0.000158	0.173725
101	133	0.000000	0.000000	0.000027
101	134	0.000000	0.000156	0.173217
101	135	0.000000	0.000064	0.144932
101	136	0.000000	0.000000	0.005532
101	137	0.000000	0.000000	0.025852
101	138	0.000000	0.000006	0.090167
101	139	0.000000	0.000068	0.146598
101	14	0.000000	0.000000	0.014715
101	140	0.000000	0.000000	0.000450
101	141	0.000000	0.007496	0.375813
101	142	0.000000	0.000311	0.198844
101	143	0.000000	0.000000	0.000055
101	144	0.000000	0.000002	0.073101
101	145	0.000000	0.000001	0.067274
101	146	0.000000	0.000041	0.132735
101	147	0.000000	0.000009	0.096827
101	148	0.000000	0.000009	0.098959
101	149	0.000000	0.000000	0.000221
101	15	0.000000	0.000000	0.016244
101	150	0.000000	0.000000	0.000057
101	151	0.000000	0.000006	0.090163
101	152	0.000000	0.001382	0.267966
101	153	0.000000	0.000000	0.005209
101	154	0.000000	0.000000	0.003060
101	155	0.000000	0.000000	0.007047
101	156	0.000000	0.000000	0.006364
101	157	0.000000	0.000227	0.186791
101	158	0.000000	0.000000	0.000076
101	159	0.000000	0.000003	0.080519
101	16	0.000000	0.000000	0.006934
101	160	0.000000	0.000010	0.099588
101	161	0.000000	0.000001	0.064155
101	162	0.000000	0.000023	0.117685
101	163	0.000000	0.002875	0.310266
101	164	0.000000	0.000000	0.010517
101	165	0.000000	0.000040	0.131756
101	166	0.000000	0.000000	0.000096
101	167	0.000000	0.000000	0.000078
101	168	0.000000	0.000000	0.000096
101	169	0.000000	0.000099	0.158195
101	17	0.000000	0.000000	0.003657
101	170	0.000000	0.000208	0.183505
101	171	0.000000	0.000000	0.038555
101	172	0.000000	0.000000	0.000357
101	173	0.000000	0.000000	0.031139
101	174	0.146297	0.618456	0.908368
101	175	0.000000	0.000000	0.036550
101	176	0.000000	0.000005	0.087148
101	177	0.000000	0.000000	0.000001
101	178	0.000000	0.003168	0.316345
101	179	0.000000	0.000000	0.017240
101	18	0.000000	0.000000	0.012127
101	180	0.000000	0.000000	0.020543
101	181	0.000000	0.000000	0.021454
101	182	0.000000	0.000000	0.024950
101	183	0.000000	0.001714	0.279766
101	184	0.000000	0.000000	0.000036
101	185	0.000000	0.000000	0.000273
101	186	0.000000	0.000000	0.000045
101	187	0.000000	0.000000	0.000044
101	188	0.000000	0.000000	0.000040
101	189	0.000000	0.000000	0.000011
101	19	0.000000	0.000000	0.010498
101	190	0.000000	0.000000	0.000512
101	191	0.258284	0.712893	0.934555
101	192	0.000019	0.066308	0.581184
101	193	0.000000	0.000000	0.001644
101	194	0.000000	0.000000	0.045646
101	195	0.000000	0.000000	0.000303
101	196	0.000018	0.064832	0.578573
101	197	0.000000	0.000000	0.000513
101	198	0.000000	0.000000	0.000464
101	199	0.000000	0.001959	0.287336
101	2	0.000000	0.000000	0.000000
101	20	0.000000	0.000000	0.018412
101	200	0.000000	0.000001	0.062574
101	201	0.000000	0.000013	0.105140
101	202	0.000000	0.000009	0.097154
101	203	0.000000	0.000007	0.094406
101	204	0.000000	0.000000	0.012892
101	205	0.000000	0.000000	0.005491
101	206	0.000000	0.000000	0.006458
101	207	0.000000	0.000000	0.005907
101	208	0.000000	0.013193	0.420790
101	209	0.000000	0.000000	0.017333
101	21	0.000000	0.000000	0.008142
101	210	0.000000	0.000000	0.023831
101	211	0.003662	0.245992	0.755413
101	212	0.000000	0.000000	0.000058
101	213	0.000000	0.000000	0.020362
101	214	0.000000	0.000512	0.219704
101	215	0.000000	0.000000	0.000194
101	216	0.000000	0.002212	0.294425
101	217	0.000000	0.000816	0.241182
101	218	0.000000	0.000419	0.211105
101	219	0.000000	0.000220	0.185577
101	22	0.000000	0.000000	0.000280
101	220	0.000000	0.000004	0.084903
101	221	0.000000	0.000000	0.042878
101	222	0.000000	0.000000	0.054905
101	223	0.000000	0.000001	0.055589
101	224	0.000000	0.000003	0.079312
101	225	0.000000	0.006930	0.369952
101	226	0.000000	0.000000	0.000002
101	227	0.000000	0.000000	0.000002
101	228	0.000000	0.000000	0.000253
101	229	0.000000	0.000000	0.000263
101	23	0.000000	0.000000	0.000533
101	230	0.000000	0.000019	0.113567
101	231	0.000000	0.000000	0.006294
101	232	0.000000	0.006243	0.362304
101	233	0.000000	0.000000	0.008248
101	234	0.000000	0.000000	0.038076
101	235	0.000000	0.000000	0.036175
101	236	0.000140	0.108720	0.641597
101	237	0.000000	0.000000	0.000007
101	238	0.000000	0.000104	0.159863
101	239	0.000000	0.000064	0.144866
101	24	0.000000	0.000000	0.000392
101	240	0.000000	0.000000	0.016237
101	241	0.000000	0.000000	0.016754
101	242	0.000000	0.000000	0.000633
101	243	0.000000	0.000000	0.000750
101	244	0.000000	0.000000	0.000807
101	245	0.000000	0.000038	0.130407
101	246	0.000000	0.000065	0.145411
101	247	0.000000	0.000000	0.015462
101	248	0.000000	0.000000	0.016914
101	249	0.000000	0.000000	0.015896
101	25	0.000000	0.000000	0.000403
101	250	0.000000	0.000061	0.143690
101	251	0.000000	0.000082	0.152194
101	252	0.000000	0.000138	0.169024
101	253	0.000000	0.000000	0.000007
101	254	0.000000	0.000000	0.005387
101	255	0.000000	0.000000	0.000554
101	256	0.000000	0.000000	0.012702
101	257	0.000000	0.000000	0.000002
101	258	0.000000	0.001042	0.253274
101	259	0.000000	0.000000	0.025436
101	26	0.000000	0.000000	0.000900
101	260	0.000000	0.000000	0.039476
101	261	0.000000	0.006380	0.363885
101	262	0.000000	0.009739	0.396007
101	263	0.000000	0.002733	0.307141
101	264	0.000000	0.000000	0.000025
101	265	0.000000	0.000001	0.062147
101	266	0.000000	0.000000	0.026058
101	267	0.000000	0.000000	0.028764
101	268	0.000000	0.000105	0.160178
101	269	0.000000	0.000253	0.190814
101	27	0.000000	0.000000	0.001066
101	270	0.000000	0.000343	0.202821
101	271	0.000000	0.000000	0.000002
101	272	0.000000	0.000000	0.013686
101	273	0.000000	0.000481	0.217007
101	274	0.000000	0.017202	0.443729
101	275	0.000000	0.000000	0.000494
101	276	0.000000	0.000000	0.044414
101	277	0.000000	0.000000	0.041170
101	278	0.000000	0.000000	0.000254
101	279	0.000000	0.000000	0.036163
101	28	0.000000	0.000000	0.002481
101	280	0.000000	0.000000	0.034889
101	281	0.000000	0.000107	0.160674
101	282	0.000000	0.000000	0.000977
101	283	0.000000	0.000000	0.022635
101	284	0.000000	0.000000	0.007555
101	285	0.000000	0.003256	0.318071
101	286	0.000000	0.000101	0.158860
101	287	0.000000	0.000288	0.195766
101	288	0.000000	0.000443	0.213476
101	289	0.000000	0.000377	0.206625
101	29	0.000000	0.000000	0.002321
101	290	0.000073	0.092440	0.621115
101	291	0.000001	0.028656	0.491409
101	292	0.000000	0.023634	0.472834
101	293	0.000000	0.000000	0.015951
101	294	0.000000	0.000000	0.014525
101	295	0.000000	0.000000	0.013463
101	296	0.000000	0.000000	0.000514
101	297	0.000000	0.000000	0.020626
101	298	0.000000	0.000000	0.018472
101	299	0.000000	0.000000	0.038799
101	3	0.000000	0.000000	0.000001
101	30	0.000000	0.000000	0.002484
101	300	0.000000	0.000000	0.042904
101	301	0.000158	0.112102	0.645539
101	302	0.000000	0.000000	0.019277
101	303	0.301709	0.741134	0.941845
101	304	0.000000	0.000023	0.118547
101	305	0.000005	0.047061	0.542664
101	306	0.000000	0.000000	0.004373
101	307	0.000000	0.000001	0.060231
101	308	0.000000	0.000000	0.049359
101	309	0.000000	0.000000	0.001835
101	31	0.000000	0.000000	0.002807
101	310	0.000000	0.000000	0.013954
101	311	0.000000	0.000000	0.012410
101	312	0.000000	0.000185	0.179244
101	313	0.000000	0.004381	0.337532
101	314	0.000000	0.000000	0.000006
101	315	0.000000	0.000273	0.193766
101	316	0.000000	0.000000	0.000870
101	317	0.000000	0.000000	0.014202
101	318	0.000000	0.000000	0.016504
101	319	0.000000	0.000000	0.000812
101	32	0.000000	0.000000	0.005215
101	320	0.000000	0.000000	0.014903
101	321	0.000000	0.000000	0.019610
101	322	0.000000	0.000000	0.054678
101	323	0.000000	0.000000	0.051231
101	324	0.000000	0.000000	0.040113
101	325	0.000000	0.000002	0.068966
101	326	0.000000	0.000000	0.000227
101	327	0.000000	0.001406	0.268907
101	328	0.000000	0.000000	0.000388
101	329	0.000000	0.000042	0.133418
101	33	0.000000	0.000000	0.003428
101	330	0.000000	0.000031	0.125528
101	331	0.000000	0.000000	0.000007
101	332	0.000000	0.000000	0.000007
101	333	0.000000	0.000000	0.011021
101	334	0.000000	0.015537	0.434787
101	335	0.000001	0.032957	0.505347
101	336	0.000000	0.010508	0.402075
101	337	0.000000	0.005955	0.358905
101	338	0.000000	0.002843	0.309567
101	339	0.000000	0.000000	0.000069
101	34	0.000000	0.000000	0.007634
101	340	0.000000	0.000000	0.011314
101	341	0.000000	0.000000	0.012056
101	342	0.000000	0.000039	0.131492
101	343	0.000000	0.000000	0.000006
101	344	0.000000	0.000000	0.000006
101	345	0.000000	0.000000	0.010327
101	346	0.000000	0.000002	0.069853
101	347	0.000000	0.000158	0.173663
101	348	0.000000	0.011064	0.406236
101	349	0.000000	0.003768	0.327506
101	35	0.000000	0.000000	0.007225
101	350	0.000000	0.002017	0.289028
101	351	0.000000	0.000000	0.000010
101	352	0.000000	0.000003	0.077466
101	353	0.000000	0.000003	0.078402
101	354	0.000000	0.000000	0.000320
101	355	0.000000	0.008046	0.381168
101	356	0.000000	0.000000	0.000089
101	357	0.000000	0.000000	0.000098
101	358	0.000000	0.000721	0.235297
101	359	0.000000	0.000830	0.242023
101	36	0.000000	0.000000	0.018985
101	360	0.000000	0.000000	0.014397
101	361	0.000000	0.000000	0.004072
101	362	0.000000	0.000000	0.000006
101	363	0.000000	0.000000	0.000430
101	364	0.000000	0.000005	0.087224
101	365	0.000000	0.016633	0.440751
101	366	0.000000	0.000000	0.001179
101	367	0.000000	0.000000	0.000048
101	368	0.000000	0.000000	0.000457
101	369	0.000000	0.000000	0.053784
101	37	0.000000	0.000000	0.011044
101	370	0.000000	0.000000	0.034953
101	371	0.000000	0.000588	0.225882
101	372	0.000000	0.000693	0.233444
101	373	0.000000	0.000000	0.000288
101	374	0.000000	0.000000	0.000005
101	375	0.000000	0.000001	0.058341
101	376	0.000000	0.000000	0.000011
101	377	0.000000	0.000032	0.126358
101	378	0.000000	0.000000	0.000001
101	379	0.000000	0.010247	0.400054
101	38	0.000000	0.000000	0.015674
101	380	0.000000	0.000013	0.104971
101	381	0.000000	0.000006	0.089023
101	382	0.000000	0.000000	0.000002
101	383	0.000000	0.000000	0.000008
101	384	0.000000	0.000000	0.000098
101	385	0.000000	0.002740	0.307287
101	386	0.000000	0.000077	0.150283
101	387	0.000000	0.000013	0.105198
101	388	0.000000	0.000000	0.000003
101	389	0.000000	0.000000	0.020135
101	39	0.000000	0.000000	0.021046
101	390	0.000000	0.000000	0.049415
101	391	0.000000	0.000000	0.014533
101	392	0.000000	0.000000	0.013930
101	393	0.000000	0.000000	0.015821
101	394	0.000000	0.000000	0.020106
101	4	0.000000	0.000000	0.000001
101	40	0.000000	0.000000	0.018519
101	41	0.000000	0.000000	0.025664
101	42	0.000000	0.000000	0.032700
101	43	0.000000	0.000000	0.050168
101	44	0.000000	0.000004	0.084672
101	45	0.000000	0.000003	0.080077
101	46	0.000000	0.000003	0.078867
101	47	0.000000	0.000024	0.119438
101	48	0.000000	0.001625	0.276819
101	49	0.000000	0.000190	0.180254
101	5	0.000000	0.000000	0.000001
101	50	0.000000	0.000595	0.226386
101	51	0.000000	0.000002	0.069465
101	52	0.000000	0.000024	0.119060
101	53	0.000000	0.000248	0.190065
101	54	0.000000	0.002408	0.299443
101	55	0.187877	0.658368	0.919801
101	56	0.000000	0.000433	0.212468
101	57	0.000000	0.007889	0.379673
101	58	0.000000	0.000101	0.158789
101	59	0.000000	0.000581	0.225355
101	6	0.000000	0.000000	0.000002
101	60	0.000000	0.001471	0.271361
101	61	0.000000	0.011800	0.411509
101	62	0.000009	0.055035	0.559922
101	63	0.000002	0.039638	0.524351
101	64	0.198202	0.667233	0.922264
101	65	0.000000	0.000000	0.015199
101	66	0.000000	0.000000	0.020535
101	67	0.000000	0.000000	0.022833
101	68	0.000000	0.000000	0.021437
101	69	0.000000	0.000000	0.032383
101	7	0.000000	0.000000	0.000002
101	70	0.000000	0.000001	0.057576
101	71	0.000000	0.000000	0.032755
101	72	0.000000	0.000002	0.072699
101	73	0.000000	0.000000	0.043308
101	74	0.000000	0.000000	0.049142
101	75	0.000000	0.000000	0.040344
101	76	0.000000	0.000000	0.037566
101	77	0.000000	0.000001	0.060576
101	78	0.000000	0.000005	0.086541
101	79	0.000000	0.000008	0.095455
101	8	0.000000	0.000000	0.003153
101	80	0.000000	0.000034	0.127770
101	81	0.000000	0.000049	0.137291
101	82	0.000000	0.000040	0.131739
101	83	0.000000	0.012833	0.418471
101	84	0.000000	0.000000	0.004947
101	85	0.000000	0.000000	0.008488
101	86	0.000000	0.000000	0.018394
101	87	0.000000	0.000000	0.048240
101	88	0.000000	0.000000	0.049224
101	89	0.000000	0.000019	0.114163
101	9	0.000000	0.000000	0.004046
101	90	0.000000	0.000179	0.178027
101	91	0.000000	0.002278	0.296140
101	92	0.000000	0.000000	0.005556
101	93	0.000000	0.000000	0.002170
101	94	0.000000	0.000000	0.002316
101	95	0.000000	0.000000	0.000733
101	96	0.000000	0.000000	0.000001
101	97	0.000000	0.000000	0.000003
101	98	0.000000	0.000000	0.000009
101	99	0.000000	0.000000	0.000009
102	1	0.000000	0.000000	0.000012
102	10	0.000000	0.000006	0.090560
102	100	0.000000	0.000000	0.000001
102	101	0.000000	0.000000	0.052887
102	103	0.000000	0.001297	0.264587
102	104	0.000000	0.000003	0.078356
102	105	0.000000	0.000005	0.085618
102	106	0.000000	0.000411	0.210225
102	107	0.000000	0.000001	0.062518
102	108	0.000000	0.000001	0.061596
102	109	0.000000	0.000000	0.043045
102	11	0.000000	0.000011	0.101414
102	110	0.000000	0.000000	0.001658
102	111	0.000000	0.000003	0.079050
102	112	0.000000	0.000003	0.077559
102	113	0.000000	0.000000	0.015732
102	114	0.000000	0.000000	0.020835
102	115	0.000000	0.000000	0.012567
102	116	0.000000	0.000000	0.012836
102	117	0.339302	0.763215	0.947391
102	118	0.000000	0.000000	0.049433
102	119	0.000000	0.000000	0.036826
102	12	0.000000	0.000035	0.128636
102	120	0.000000	0.000002	0.074710
102	121	0.000000	0.000000	0.049661
102	122	0.000000	0.000000	0.046608
102	123	0.000000	0.000000	0.044746
102	124	0.000000	0.000000	0.048217
102	125	0.000000	0.000208	0.183471
102	126	0.000000	0.000000	0.020693
102	127	0.000000	0.000000	0.024056
102	128	0.000000	0.000020	0.115248
102	129	0.000000	0.000000	0.012309
102	13	0.000000	0.000002	0.075604
102	130	0.000000	0.000011	0.101371
102	131	0.000000	0.000000	0.016182
102	132	0.000000	0.001184	0.259831
102	133	0.000000	0.000000	0.000540
102	134	0.000000	0.000000	0.033483
102	135	0.000000	0.000000	0.040541
102	136	0.000000	0.000000	0.006883
102	137	0.000000	0.005495	0.353183
102	138	0.000000	0.003353	0.319957
102	139	0.000000	0.000000	0.016697
102	14	0.000000	0.001018	0.252102
102	140	0.000000	0.000000	0.009222
102	141	0.000000	0.000069	0.147091
102	142	0.000000	0.000001	0.055691
102	143	0.000000	0.000000	0.000543
102	144	0.000000	0.000000	0.046940
102	145	0.000000	0.000000	0.051458
102	146	0.000000	0.000067	0.146149
102	147	0.000000	0.000071	0.147856
102	148	0.000000	0.000015	0.109141
102	149	0.000000	0.000000	0.004497
102	15	0.000000	0.002792	0.308441
102	150	0.000000	0.000000	0.001187
102	151	0.000005	0.047994	0.544801
102	152	0.000000	0.001534	0.273618
102	153	0.000000	0.000000	0.038794
102	154	0.000000	0.000000	0.022988
102	155	0.000000	0.000000	0.050740
102	156	0.000000	0.000000	0.044364
102	157	0.000000	0.000000	0.011105
102	158	0.000000	0.000000	0.001576
102	159	0.000000	0.000002	0.071508
102	16	0.000000	0.000001	0.067839
102	160	0.000000	0.000005	0.085734
102	161	0.000000	0.000000	0.040861
102	162	0.000006	0.049635	0.548477
102	163	0.000000	0.000000	0.025106
102	164	0.000000	0.000121	0.164668
102	165	0.000000	0.005041	0.347143
102	166	0.000000	0.000000	0.001984
102	167	0.000000	0.000000	0.001611
102	168	0.000000	0.000000	0.001985
102	169	0.000000	0.005848	0.357605
102	17	0.000000	0.000000	0.028010
102	170	0.000000	0.002063	0.290326
102	171	0.000001	0.030606	0.497923
102	172	0.000000	0.000000	0.007297
102	173	0.000120	0.104731	0.636818
102	174	0.000000	0.000001	0.061587
102	175	0.003258	0.238911	0.751013
102	176	0.000001	0.026985	0.485540
102	177	0.000000	0.000000	0.000014
102	178	0.000000	0.000000	0.038395
102	179	0.000000	0.000000	0.013901
102	18	0.000000	0.000040	0.131687
102	180	0.000000	0.000000	0.019109
102	181	0.000000	0.000000	0.016684
102	182	0.000000	0.000000	0.017977
102	183	0.000000	0.000000	0.031347
102	184	0.000000	0.000000	0.000753
102	185	0.000000	0.000000	0.004716
102	186	0.000000	0.000000	0.000930
102	187	0.000000	0.000000	0.000901
102	188	0.000000	0.000000	0.000825
102	189	0.000000	0.000000	0.000170
102	19	0.000000	0.000000	0.022611
102	190	0.000000	0.000000	0.007742
102	191	0.000000	0.000000	0.049719
102	192	0.000000	0.000050	0.138166
102	193	0.000000	0.000000	0.033773
102	194	0.129315	0.599670	0.902781
102	195	0.000000	0.000000	0.006223
102	196	0.000000	0.000001	0.058086
102	197	0.000000	0.000000	0.010405
102	198	0.000000	0.000000	0.009410
102	199	0.000000	0.000000	0.051773
102	2	0.000000	0.000000	0.000008
102	20	0.000000	0.000000	0.008446
102	200	0.301709	0.741134	0.941845
102	201	0.000074	0.092895	0.621726
102	202	0.000019	0.066438	0.581410
102	203	0.000000	0.015112	0.432380
102	204	0.000000	0.001120	0.256936
102	205	0.000000	0.000000	0.027778
102	206	0.000000	0.000000	0.030686
102	207	0.000000	0.000000	0.027862
102	208	0.000000	0.000000	0.049184
102	209	0.000000	0.004480	0.339043
102	21	0.000000	0.000000	0.002404
102	210	0.000000	0.000038	0.130662
102	211	0.000000	0.000001	0.064379
102	212	0.000000	0.000000	0.001205
102	213	0.000000	0.000000	0.029579
102	214	0.000000	0.000529	0.221183
102	215	0.000000	0.000000	0.003934
102	216	0.000000	0.000002	0.070637
102	217	0.000000	0.000019	0.113379
102	218	0.000000	0.000005	0.085508
102	219	0.000000	0.000018	0.112584
102	22	0.000000	0.000000	0.005111
102	220	0.000000	0.000093	0.156209
102	221	0.000000	0.000001	0.057733
102	222	0.000000	0.000000	0.050414
102	223	0.000000	0.000001	0.055719
102	224	0.000000	0.000000	0.015280
102	225	0.000000	0.000000	0.053199
102	226	0.000000	0.000000	0.000036
102	227	0.000000	0.000000	0.000039
102	228	0.000000	0.000000	0.005061
102	229	0.000000	0.000000	0.005186
102	23	0.000000	0.000000	0.009960
102	230	0.000000	0.000000	0.037995
102	231	0.000000	0.000015	0.108645
102	232	0.000000	0.000018	0.112522
102	233	0.000000	0.000000	0.010077
102	234	0.008996	0.307970	0.790136
102	235	0.001401	0.193471	0.719985
102	236	0.000000	0.000004	0.081827
102	237	0.000000	0.000000	0.000145
102	238	0.000000	0.001098	0.255952
102	239	0.000000	0.001167	0.259056
102	24	0.000000	0.000000	0.006701
102	240	0.000000	0.000000	0.018223
102	241	0.000000	0.000000	0.020643
102	242	0.000000	0.000000	0.012605
102	243	0.000000	0.000000	0.014848
102	244	0.000000	0.000000	0.014911
102	245	0.000000	0.000006	0.090198
102	246	0.000000	0.000003	0.078145
102	247	0.000000	0.000000	0.029518
102	248	0.000000	0.000000	0.031311
102	249	0.000000	0.000000	0.026093
102	25	0.000000	0.000000	0.006530
102	250	0.000000	0.000307	0.198352
102	251	0.000000	0.000307	0.198355
102	252	0.000000	0.000404	0.209541
102	253	0.000000	0.000000	0.000002
102	254	0.000000	0.000000	0.014790
102	255	0.000000	0.000000	0.010219
102	256	0.000000	0.000005	0.087293
102	257	0.000000	0.000000	0.000024
102	258	0.000000	0.000000	0.017324
102	259	0.000000	0.011963	0.412637
102	26	0.000000	0.000000	0.016864
102	260	0.000000	0.000017	0.110540
102	261	0.000000	0.000021	0.116368
102	262	0.000000	0.000023	0.117655
102	263	0.000000	0.000000	0.049131
102	264	0.000000	0.000000	0.000367
102	265	0.000000	0.000059	0.142484
102	266	0.000000	0.000000	0.028785
102	267	0.000000	0.000000	0.031441
102	268	0.000000	0.000023	0.118298
102	269	0.000000	0.000159	0.173931
102	27	0.000000	0.000000	0.020783
102	270	0.000000	0.001215	0.261171
102	271	0.000000	0.000000	0.000031
102	272	0.000000	0.001850	0.284080
102	273	0.000000	0.000104	0.159724
102	274	0.000000	0.000000	0.022761
102	275	0.000000	0.000000	0.008877
102	276	0.000000	0.000119	0.164203
102	277	0.000000	0.000048	0.136600
102	278	0.000000	0.000000	0.005189
102	279	0.000000	0.000025	0.120032
102	28	0.000000	0.000000	0.051320
102	280	0.000000	0.000037	0.129987
102	281	0.000000	0.000004	0.083204
102	282	0.000000	0.000000	0.020065
102	283	0.000000	0.000321	0.200159
102	284	0.000000	0.000031	0.125575
102	285	0.000000	0.000005	0.085295
102	286	0.000000	0.003724	0.326741
102	287	0.000000	0.001311	0.265176
102	288	0.000000	0.000001	0.063038
102	289	0.000000	0.000002	0.069131
102	29	0.000000	0.000000	0.048226
102	290	0.000000	0.000004	0.084677
102	291	0.000000	0.000001	0.067004
102	292	0.000000	0.000002	0.072580
102	293	0.000000	0.000011	0.102224
102	294	0.000000	0.000006	0.090722
102	295	0.000000	0.000005	0.087935
102	296	0.000000	0.000000	0.010095
102	297	0.000000	0.000000	0.031703
102	298	0.000000	0.000000	0.032406
102	299	0.000000	0.000000	0.026729
102	3	0.000000	0.000000	0.000011
102	30	0.000000	0.000000	0.051328
102	300	0.000000	0.000000	0.024161
102	301	0.000000	0.000000	0.043654
102	302	0.000000	0.000022	0.117113
102	303	0.000000	0.000001	0.063596
102	304	0.000000	0.005866	0.357819
102	305	0.000000	0.000000	0.041832
102	306	0.000000	0.000000	0.007965
102	307	0.000000	0.000000	0.048397
102	308	0.000000	0.000000	0.043873
102	309	0.000000	0.000000	0.038046
102	31	0.000000	0.000000	0.053738
102	310	0.000000	0.000000	0.020431
102	311	0.000000	0.000000	0.020306
102	312	0.000000	0.000004	0.083028
102	313	0.000000	0.000378	0.206821
102	314	0.000000	0.000000	0.000115
102	315	0.000000	0.000002	0.073384
102	316	0.000000	0.000000	0.016745
102	317	0.000000	0.000000	0.030984
102	318	0.000000	0.000000	0.038294
102	319	0.000000	0.000000	0.016759
102	32	0.000000	0.000011	0.101595
102	320	0.000000	0.000000	0.012940
102	321	0.000000	0.000000	0.015504
102	322	0.000000	0.000000	0.025496
102	323	0.000000	0.000000	0.028677
102	324	0.000000	0.000000	0.019169
102	325	0.000000	0.000000	0.033479
102	326	0.000000	0.000000	0.002727
102	327	0.000000	0.000039	0.130958
102	328	0.000000	0.000000	0.006145
102	329	0.000000	0.001773	0.281681
102	33	0.000000	0.000000	0.049963
102	330	0.000000	0.002968	0.312233
102	331	0.000000	0.000000	0.000002
102	332	0.000000	0.000000	0.000002
102	333	0.000000	0.000000	0.021147
102	334	0.000000	0.000000	0.051433
102	335	0.000000	0.000001	0.067311
102	336	0.000000	0.000002	0.068737
102	337	0.000000	0.000002	0.075760
102	338	0.000000	0.000000	0.053185
102	339	0.000000	0.000000	0.000733
102	34	0.000000	0.000050	0.137807
102	340	0.000000	0.000665	0.231538
102	341	0.000000	0.000904	0.246144
102	342	0.000000	0.023895	0.473872
102	343	0.000000	0.000000	0.000099
102	344	0.000000	0.000000	0.000098
102	345	0.000000	0.000000	0.019404
102	346	0.017749	0.365000	0.817445
102	347	0.000000	0.008636	0.386602
102	348	0.000000	0.000001	0.066506
102	349	0.000000	0.000319	0.199846
102	35	0.000000	0.000025	0.119725
102	350	0.000000	0.000230	0.187297
102	351	0.000000	0.000000	0.000143
102	352	0.000000	0.003282	0.318582
102	353	0.000000	0.004481	0.339059
102	354	0.000000	0.000000	0.005920
102	355	0.000000	0.000035	0.128515
102	356	0.000000	0.000000	0.001815
102	357	0.000000	0.000000	0.002004
102	358	0.000000	0.000837	0.242388
102	359	0.000000	0.000000	0.052468
102	36	0.000000	0.002990	0.312700
102	360	0.000000	0.000100	0.158538
102	361	0.000000	0.000000	0.043045
102	362	0.000000	0.000000	0.000001
102	363	0.000000	0.000000	0.007146
102	364	0.000200	0.118854	0.653135
102	365	0.000000	0.000007	0.094115
102	366	0.000000	0.000000	0.024352
102	367	0.000000	0.000000	0.000992
102	368	0.000000	0.000000	0.006870
102	369	0.000000	0.000010	0.099612
102	37	0.000000	0.000078	0.150695
102	370	0.000000	0.000000	0.039664
102	371	0.000000	0.000463	0.215361
102	372	0.000000	0.000400	0.209079
102	373	0.000000	0.000000	0.005813
102	374	0.000000	0.000000	0.000107
102	375	0.000000	0.000142	0.169899
102	376	0.000000	0.000000	0.000136
102	377	0.000000	0.000103	0.159420
102	378	0.000000	0.000000	0.000012
102	379	0.000000	0.000000	0.029493
102	38	0.000000	0.000363	0.205133
102	380	0.000000	0.005819	0.357251
102	381	0.000000	0.007818	0.378982
102	382	0.000000	0.000000	0.000037
102	383	0.000000	0.000000	0.000135
102	384	0.000000	0.000000	0.002024
102	385	0.000000	0.000000	0.042433
102	386	0.000000	0.000000	0.013530
102	387	0.000095	0.098712	0.629324
102	388	0.000000	0.000000	0.000042
102	389	0.000000	0.000001	0.058707
102	39	0.000000	0.000707	0.234380
102	390	0.000000	0.000007	0.093966
102	391	0.000000	0.000000	0.052141
102	392	0.000000	0.000000	0.045385
102	393	0.000000	0.000001	0.056006
102	394	0.000000	0.000000	0.050972
102	4	0.000000	0.000000	0.000021
102	40	0.000000	0.000981	0.250247
102	41	0.000000	0.008360	0.384097
102	42	0.000108	0.102009	0.633472
102	43	0.869389	0.965614	0.993026
102	44	0.044159	0.458410	0.855561
102	45	0.043965	0.457907	0.855373
102	46	0.000010	0.055582	0.561031
102	47	0.000000	0.011097	0.406479
102	48	0.000000	0.000099	0.158222
102	49	0.000000	0.002722	0.306879
102	5	0.000000	0.000000	0.000018
102	50	0.000000	0.001299	0.264697
102	51	0.000000	0.010384	0.401121
102	52	0.000000	0.018416	0.449820
102	53	0.000005	0.046364	0.541049
102	54	0.000000	0.000332	0.201418
102	55	0.000000	0.000156	0.173220
102	56	0.000000	0.001038	0.253045
102	57	0.000000	0.000117	0.163637
102	58	0.000000	0.000209	0.183732
102	59	0.000000	0.000205	0.183039
102	6	0.000000	0.000000	0.000024
102	60	0.000000	0.000009	0.097699
102	61	0.000000	0.000006	0.089335
102	62	0.000000	0.000005	0.085522
102	63	0.000000	0.000001	0.057717
102	64	0.000000	0.000000	0.048348
102	65	0.000000	0.000001	0.064541
102	66	0.000000	0.000001	0.066193
102	67	0.000000	0.000001	0.063407
102	68	0.000000	0.000051	0.138533
102	69	0.000000	0.000047	0.136253
102	7	0.000000	0.000000	0.000034
102	70	0.000000	0.000201	0.182178
102	71	0.000000	0.000006	0.090074
102	72	0.000000	0.000008	0.094430
102	73	0.000000	0.000000	0.037660
102	74	0.000000	0.000000	0.030707
102	75	0.000000	0.000000	0.017863
102	76	0.000000	0.000000	0.015433
102	77	0.000000	0.000000	0.033193
102	78	0.000000	0.000000	0.048735
102	79	0.000000	0.000001	0.056445
102	8	0.000000	0.000001	0.062112
102	80	0.000000	0.000012	0.103948
102	81	0.000000	0.000003	0.080651
102	82	0.000000	0.000000	0.053372
102	83	0.000000	0.000000	0.039108
102	84	0.000000	0.000000	0.011375
102	85	0.000000	0.000000	0.012004
102	86	0.000000	0.000000	0.013930
102	87	0.000000	0.000000	0.023369
102	88	0.000000	0.000000	0.015949
102	89	0.000000	0.000000	0.024732
102	9	0.000000	0.000003	0.077601
102	90	0.000000	0.000000	0.038160
102	91	0.000000	0.000000	0.036185
102	92	0.000000	0.000000	0.001068
102	93	0.000000	0.000000	0.000253
102	94	0.000000	0.000000	0.000293
102	95	0.000000	0.000000	0.000120
102	96	0.000000	0.000000	0.000001
102	97	0.000000	0.000000	0.000001
102	98	0.000000	0.000000	0.000002
102	99	0.000000	0.000000	0.000002
103	1	0.000000	0.000000	0.000008
103	10	0.000000	0.000000	0.023423
103	100	0.000000	0.000000	0.000003
103	101	0.000000	0.000018	0.112692
103	102	0.000000	0.001297	0.264587
103	104	0.000000	0.000001	0.067309
103	105	0.000000	0.000002	0.075181
103	106	0.000043	0.080752	0.604548
103	107	0.000000	0.000000	0.045272
103	108	0.000000	0.000000	0.049633
103	109	0.000000	0.000000	0.038439
103	11	0.000000	0.000000	0.025373
103	110	0.000000	0.000000	0.000578
103	111	0.000000	0.000003	0.079947
103	112	0.000000	0.000004	0.083092
103	113	0.000000	0.000000	0.005152
103	114	0.000000	0.000000	0.008747
103	115	0.000000	0.000000	0.004818
103	116	0.000000	0.000000	0.006291
103	117	0.000000	0.002144	0.292583
103	118	0.000000	0.000000	0.020131
103	119	0.000000	0.000000	0.015298
103	12	0.000000	0.000000	0.032430
103	120	0.000000	0.000182	0.178589
103	121	0.000000	0.000004	0.084430
103	122	0.000000	0.000009	0.096994
103	123	0.000000	0.000009	0.097746
103	124	0.000000	0.000000	0.052736
103	125	0.000000	0.000000	0.047665
103	126	0.000000	0.000000	0.011980
103	127	0.000000	0.000000	0.013565
103	128	0.000000	0.000001	0.061950
103	129	0.000000	0.000000	0.004405
[truncated: 152,844 more rows]
